# Supplementary material for: Superoxide dismutase activity enabled by a redox-active ligand rather than metal
Source: Springer Nature journal article supplement (doi:10.1038/s41557-018-0137-1), 2018-09-19
Supplement: 41557_2018_137_MOESM3_ESM.mol [file 41557_2018_137_MOESM3_ESM.mol]

nchem.17112325D-compH2qtp1.mol
  ChemDraw08121823262D

 34 37  0  0  0  0  0  0  0  0999 V2000
   -0.4125    0.2570    0.0000 C   0  0  0  0  0  0  0  0  0  0  0  0
    0.4125    0.2570    0.0000 C   0  0  0  0  0  0  0  0  0  0  0  0
   -0.8250   -0.4575    0.0000 N   0  0  0  0  0  0  0  0  0  0  0  0
    0.8250   -0.4575    0.0000 N   0  0  0  0  0  0  0  0  0  0  0  0
    1.6500   -0.4575    0.0000 C   0  0  0  0  0  0  0  0  0  0  0  0
   -1.6500   -0.4575    0.0000 C   0  0  0  0  0  0  0  0  0  0  0  0
    2.0625   -1.1719    0.0000 C   0  0  0  0  0  0  0  0  0  0  0  0
   -2.0625   -1.1719    0.0000 C   0  0  0  0  0  0  0  0  0  0  0  0
   -2.8875   -1.1719    0.0000 C   0  0  0  0  0  0  0  0  0  0  0  0
   -3.3000   -1.8864    0.0000 C   0  0  0  0  0  0  0  0  0  0  0  0
   -2.8875   -2.6009    0.0000 C   0  0  0  0  0  0  0  0  0  0  0  0
   -2.0625   -2.6009    0.0000 C   0  0  0  0  0  0  0  0  0  0  0  0
   -1.6500   -1.8864    0.0000 N   0  0  0  0  0  0  0  0  0  0  0  0
    1.6500   -1.8864    0.0000 N   0  0  0  0  0  0  0  0  0  0  0  0
    2.0625   -2.6009    0.0000 C   0  0  0  0  0  0  0  0  0  0  0  0
    2.8875   -2.6009    0.0000 C   0  0  0  0  0  0  0  0  0  0  0  0
    3.3000   -1.8864    0.0000 C   0  0  0  0  0  0  0  0  0  0  0  0
    2.8875   -1.1719    0.0000 C   0  0  0  0  0  0  0  0  0  0  0  0
    1.4437    0.1745    0.0000 C   0  0  0  0  0  0  0  0  0  0  0  0
    1.4437    0.9170    0.0000 C   0  0  0  0  0  0  0  0  0  0  0  0
    2.1582    1.3295    0.0000 C   0  0  0  0  0  0  0  0  0  0  0  0
    2.1582    2.1545    0.0000 C   0  0  0  0  0  0  0  0  0  0  0  0
    1.4437    2.5670    0.0000 C   0  0  0  0  0  0  0  0  0  0  0  0
    0.7293    2.1545    0.0000 C   0  0  0  0  0  0  0  0  0  0  0  0
    0.7293    1.3295    0.0000 C   0  0  0  0  0  0  0  0  0  0  0  0
    2.8727    0.9170    0.0000 O   0  0  0  0  0  0  0  0  0  0  0  0
    0.0148    2.5670    0.0000 O   0  0  0  0  0  0  0  0  0  0  0  0
   -1.4084    0.1259    0.0000 C   0  0  0  0  0  0  0  0  0  0  0  0
   -1.4084    0.9509    0.0000 C   0  0  0  0  0  0  0  0  0  0  0  0
   -0.6939    1.3634    0.0000 C   0  0  0  0  0  0  0  0  0  0  0  0
   -0.6939    2.1884    0.0000 C   0  0  0  0  0  0  0  0  0  0  0  0
   -1.4084    2.6009    0.0000 C   0  0  0  0  0  0  0  0  0  0  0  0
   -2.1228    2.1884    0.0000 C   0  0  0  0  0  0  0  0  0  0  0  0
   -2.1228    1.3634    0.0000 N   0  0  0  0  0  0  0  0  0  0  0  0
  1  2  1  0      
  1  3  1  0      
  2  4  1  0      
  4  5  1  0      
  3  6  1  0      
  5  7  1  0      
  6  8  1  0      
  8  9  2  0      
  9 10  1  0      
 10 11  2  0      
 11 12  1  0      
 12 13  2  0      
 13  8  1  0      
  7 14  2  0      
 14 15  1  0      
 15 16  2  0      
 16 17  1  0      
 17 18  2  0      
 18  7  1  0      
  4 19  1  0      
 19 20  1  0      
 20 21  2  0      
 21 22  1  0      
 22 23  2  0      
 23 24  1  0      
 24 25  2  0      
 25 20  1  0      
 21 26  1  0      
 24 27  1  0      
  3 28  1  0      
 28 29  1  0      
 29 30  2  0      
 30 31  1  0      
 31 32  2  0      
 32 33  1  0      
 33 34  2  0      
 34 29  1  0      
M  END
