# Supplementary material for: Superoxide dismutase activity enabled by a redox-active ligand rather than metal
Source: Springer Nature journal article supplement (doi:10.1038/s41557-018-0137-1), 2018-09-19
Supplement: 41557_2018_137_MOESM20_ESM.fcf [file 41557_2018_137_MOESM20_ESM.fcf]

#
# h,k,l, Fc-squared, Fo-squared, sigma(Fo-squared), status flag
#
data_Goldsmith070715_0ma
_shelx_title ' Goldsmith070715_0ma in Pca2(1)'
_shelx_refln_list_code          4
_shelx_F_calc_maximum      332.42
_exptl_crystal_F_000      1780.00
_reflns_d_resolution_high  0.7583

loop_
 _space_group_symop_operation_xyz
 'x, y, z'
 '-x, -y, z+1/2'
 '-x+1/2, y, z+1/2'
 'x+1/2, -y, z'

_cell_length_a    16.6985
_cell_length_b    12.4092
_cell_length_c    17.7201
_cell_angle_alpha  90.000
_cell_angle_beta   90.000
_cell_angle_gamma  90.000

_shelx_F_squared_multiplier     1.000

loop_
 _refln_index_h
 _refln_index_k
 _refln_index_l
 _refln_F_squared_calc
 _refln_F_squared_meas
 _refln_F_squared_sigma
 _refln_observed_status
   2   0 -23        605.77        573.12        52.86 o
   1   1 -23        169.33        150.48        23.82 o
   2   1 -23        146.15        162.30        22.96 o
   3   1 -23        379.73        483.27        62.73 o
   1   2 -23         46.77        128.38        18.01 o
   2   2 -23        284.84        247.05        23.03 o
   0   0 -22        691.50        757.44       101.07 o
   2   0 -22        163.02        124.30        29.04 o
   4   0 -22        761.09        978.17       104.55 o
   6   0 -22        102.12        217.24        53.44 o
   0   1 -22         60.87         26.56        41.82 o
   1   1 -22        329.19        325.85        27.79 o
   2   1 -22         43.53        123.42        21.04 o
   3   1 -22        100.96        123.36        21.77 o
   4   1 -22        208.76        224.65        24.75 o
   5   1 -22        713.86        706.78        57.80 o
   6   1 -22         53.01        181.43        23.75 o
   7   1 -22        248.34        201.10        59.83 o
   0   2 -22        112.23        333.41        41.82 o
   1   2 -22        271.29        355.24        35.45 o
   2   2 -22        125.92         71.07        17.57 o
   3   2 -22        447.29        373.63        46.88 o
   4   2 -22        491.94        501.40        48.38 o
   5   2 -22        227.95        323.57        63.89 o
   6   2 -22        423.89        379.67        39.38 o
   0   3 -22        499.66        631.06        52.35 o
   1   3 -22        149.77        321.80        42.98 o
   2   3 -22        139.95         90.03        54.02 o
   3   3 -22         42.61         79.61        22.03 o
   4   3 -22        386.00        354.33        62.16 o
   5   3 -22        260.11        245.09        44.90 o
   6   3 -22        730.90        649.81       193.43 o
   0   4 -22        228.70        209.11        39.50 o
   1   4 -22        364.78        324.45        29.00 o
   2   4 -22         49.26        131.61        23.31 o
   3   4 -22         94.15         93.82        40.66 o
   4   4 -22         22.11         36.01        26.72 o
   5   4 -22        548.68        434.10       108.62 o
   0   5 -22        774.39        767.89       175.42 o
   1   5 -22        238.40        233.34        48.21 o
   2   5 -22         22.24         57.15        45.89 o
   3   5 -22         62.32        102.39        25.50 o
   2   0 -21       1802.98       1819.18       140.73 o
   4   0 -21         92.60         70.86        20.91 o
   6   0 -21        304.66        260.22        61.57 o
   8   0 -21         85.18         83.64        24.40 o
   1   1 -21       1315.81       1383.19        79.45 o
   2   1 -21        139.74        294.64        70.28 o
   3   1 -21        701.41        724.32        65.06 o
   4   1 -21        250.64        257.95        49.30 o
   5   1 -21        283.07        300.28        33.26 o
   6   1 -21          7.97         61.19        18.05 o
   7   1 -21        220.90        133.62        58.09 o
   8   1 -21        112.41        214.92        38.34 o
   9   1 -21         77.54         90.64        60.41 o
   1   2 -21        437.26        517.03        72.58 o
   2   2 -21        531.29        526.66        67.69 o
   3   2 -21        839.62        902.90        77.84 o
   4   2 -21         73.19         52.28        17.19 o
   5   2 -21        236.88        172.09        35.09 o
   6   2 -21        133.94        151.95        48.79 o
   7   2 -21        170.63        185.10        36.59 o
   8   2 -21       1168.15        977.56       175.42 o
   9   2 -21        206.83        256.44        50.53 o
   1   3 -21         19.37         60.50        19.64 o
   2   3 -21        218.77        246.04        40.47 o
   3   3 -21         61.80         75.18        22.30 o
   4   3 -21       1294.06       1414.21       108.20 o
   5   3 -21        251.26        241.46        36.53 o
   6   3 -21        435.53        351.72        60.27 o
   7   3 -21        488.42        367.69        56.82 o
   8   3 -21        716.36        471.09        98.17 o
   1   4 -21         29.20         57.91        32.27 o
   2   4 -21        156.54        129.29        18.18 o
   3   4 -21       1027.67        992.61        79.93 o
   4   4 -21        146.96        122.47        32.97 o
   5   4 -21         78.38        108.88        18.78 o
   6   4 -21        111.69        105.13        45.31 o
   7   4 -21        920.12       1033.98       164.58 o
   1   5 -21          0.88         58.00        34.27 o
   2   5 -21        156.35        123.06        36.01 o
   3   5 -21        211.16        199.39        67.96 o
   4   5 -21        163.91        171.81        30.36 o
   5   5 -21          2.14         61.39        29.26 o
   6   5 -21        872.79        789.90        73.44 o
   1   6 -21         93.38         69.89        22.96 o
   2   6 -21        312.50        184.71        32.93 o
   3   6 -21         67.26         81.59        16.43 o
   4   6 -21         38.59         46.50        16.82 o
   5   6 -21        225.58        216.38        28.19 o
   1   7 -21        333.02        352.83        99.33 o
   0   0 -20       1716.31       1737.93       183.55 o
   2   0 -20        200.23        306.20        55.41 o
   4   0 -20        883.95       1033.14        93.26 o
   6   0 -20        762.44        886.39       192.85 o
   8   0 -20        285.71        182.39        52.28 o
  10   0 -20        744.54        738.85        97.58 o
   0   1 -20        592.18        765.86       148.12 o
   1   1 -20        652.39        608.83        67.40 o
   2   1 -20        166.07        150.98        32.04 o
   3   1 -20          1.07         34.98        15.03 o
   4   1 -20        219.26        176.24        48.96 o
   5   1 -20        308.00        363.71        61.63 o
   6   1 -20         92.98        151.50        27.44 o
   7   1 -20        184.59        186.86        68.54 o
   8   1 -20        362.84        526.31       113.27 o
   9   1 -20        624.28        787.09       151.02 o
  10   1 -20        116.03         96.42        34.85 o
  11   1 -20        563.33        714.46       174.26 o
   0   2 -20       1436.08       1386.28       115.04 o
   1   2 -20         99.17        111.00        18.31 o
   2   2 -20        197.26        227.74        27.58 o
   3   2 -20        105.77        128.42        21.14 o
   4   2 -20        419.16        560.71       100.67 o
   5   2 -20        545.45        527.90        54.94 o
   6   2 -20        213.57        246.82        55.73 o
   7   2 -20        154.87        125.43        19.19 o
   8   2 -20        176.50        212.28        45.89 o
   9   2 -20         54.25         27.86        49.37 o
  10   2 -20        182.74        107.94        22.33 o
  11   2 -20         72.78        153.27        48.79 o
   0   3 -20       2523.91       2591.70       173.57 o
   1   3 -20        161.26        146.82        20.79 o
   2   3 -20        245.14        190.51        20.03 o
   3   3 -20        148.18         93.45        17.13 o
   4   3 -20        698.97        653.61        86.41 o
   5   3 -20        335.29        524.05        59.72 o
   6   3 -20        238.75        218.30        38.23 o
   7   3 -20         32.79         87.35        18.78 o
   8   3 -20         54.55         95.92        21.79 o
   9   3 -20         94.03        100.55        69.70 o
  10   3 -20        612.87        847.60       104.55 o
   0   4 -20          8.89         23.23        23.23 o
   1   4 -20       1374.73       1463.17        94.53 o
   2   4 -20         88.16         70.36        22.30 o
   3   4 -20         16.25         96.70        28.82 o
   4   4 -20         49.93         36.65        22.05 o
   5   4 -20        939.10        919.79        77.63 o
   6   4 -20        195.19        278.43        55.23 o
   7   4 -20         93.91         42.98        20.91 o
   8   4 -20         27.80         57.00        32.02 o
   9   4 -20       1162.50       1193.55        82.23 o
  10   4 -20         59.91         60.35        51.70 o
   0   5 -20        384.77        209.11        41.82 o
   1   5 -20        201.13         99.38        27.88 o
   2   5 -20         60.59        117.52        23.82 o
   3   5 -20         79.69        138.11        22.07 o
   4   5 -20        657.46        685.58        68.40 o
   5   5 -20        135.88        163.89        22.73 o
   6   5 -20        165.72        223.05        30.79 o
   7   5 -20        127.91        196.33        46.47 o
   8   5 -20          4.32        225.37        44.15 o
   9   5 -20        623.36        769.03        93.37 o
   0   6 -20        215.55         37.17        37.17 o
   1   6 -20        519.57        469.33       131.27 o
   2   6 -20         68.29        157.05        27.88 o
   3   6 -20         46.16         -5.07        17.19 o
   4   6 -20         76.82         83.92        31.95 o
   5   6 -20        181.11        275.76        78.42 o
   6   6 -20        150.91        198.63        33.40 o
   7   6 -20          1.14        163.47        44.73 o
   0   7 -20        202.53        176.58        60.41 o
   1   7 -20        213.86        175.82        27.06 o
   2   7 -20         34.09         31.56        18.91 o
   3   7 -20        248.10        200.90        31.08 o
   4   7 -20         56.75         53.07        19.80 o
   5   7 -20        779.36        815.89        86.34 o
   6   7 -20        273.60        320.37        74.27 o
   0   8 -20        737.90        501.86       121.98 o
   1   8 -20        135.06        115.01        25.56 o
   2   8 -20        104.58        106.72        45.31 o
   3   8 -20         53.98         66.62        20.11 o
   2   0 -19       2054.43       2237.01       158.59 o
   4   0 -19        146.96        128.20        33.65 o
   6   0 -19         57.70         36.01        19.75 o
   8   0 -19       1814.14       1922.64       230.02 o
  10   0 -19        176.73        195.17        36.01 o
  12   0 -19        706.90        465.85       125.47 o
   1   1 -19       1473.20       1560.95        90.17 o
   2   1 -19        509.96        433.13        53.48 o
   3   1 -19       1145.40       1318.05        79.29 o
   4   1 -19        652.52        638.15        70.29 o
   5   1 -19        168.92        190.52        42.25 o
   6   1 -19        195.41        186.55        69.70 o
   7   1 -19        813.22        741.85        78.66 o
   8   1 -19         51.95        132.44        38.34 o
   9   1 -19        132.74        196.49        36.94 o
  10   1 -19         30.90         41.24        16.43 o
  11   1 -19        299.42        330.18        72.03 o
  12   1 -19        190.12         82.48        26.72 o
   1   2 -19        127.28         88.59        26.63 o
   2   2 -19        576.01        615.83        51.25 o
   3   2 -19       1227.28       1227.24        78.31 o
   4   2 -19        299.33        347.76        55.60 o
   5   2 -19        108.44         73.63        15.69 o
   6   2 -19         17.80         70.54        13.47 o
   7   2 -19        162.17         99.33        21.22 o
   8   2 -19        890.18        796.60        73.13 o
   9   2 -19         87.98        107.57        22.55 o
  10   2 -19         67.81        159.08        51.70 o
  11   2 -19        187.67        118.38        23.06 o
  12   2 -19        342.37        450.16        83.23 o
   1   3 -19        772.39        803.06        85.93 o
   2   3 -19        467.28        496.80        45.76 o
   3   3 -19        274.74        212.64        33.36 o
   4   3 -19        219.07        236.97        44.16 o
   5   3 -19         78.44        135.96        45.74 o
   6   3 -19        676.92        660.46        88.60 o
   7   3 -19        130.05        101.40        33.60 o
   8   3 -19       1119.36        977.15        83.03 o
   9   3 -19         64.82         77.57        15.16 o
  10   3 -19        130.79        159.17        26.24 o
  11   3 -19        549.32        432.89        73.44 o
  12   3 -19        632.90        608.28        93.52 o
   1   4 -19        317.00        366.18        59.64 o
   2   4 -19        229.14        160.74        29.19 o
   3   4 -19       1686.42       1600.46       144.12 o
   4   4 -19        129.87        119.68        19.19 o
   5   4 -19          2.58         16.87        13.83 o
   6   4 -19         16.20         12.04        31.94 o
   7   4 -19       1007.61       1047.58        78.62 o
   8   4 -19         53.55        117.56        20.65 o
   9   4 -19        119.29         65.62        20.13 o
  10   4 -19          9.88         -9.84        24.23 o
  11   4 -19        516.79        591.31       154.51 o
   1   5 -19         26.95        -13.23        13.23 o
   2   5 -19        985.62        862.60        85.41 o
   3   5 -19        254.82        349.59        59.44 o
   4   5 -19       1065.09       1013.57        94.09 o
   5   5 -19        142.72        100.23        24.28 o
   6   5 -19        534.88        604.91        82.24 o
   7   5 -19        146.26        123.97        23.63 o
   8   5 -19        556.21        601.95        48.65 o
   9   5 -19         38.98         46.62        66.80 o
  10   5 -19         16.50         25.08        18.53 o
   1   6 -19        196.96        101.69        31.82 o
   2   6 -19        295.25        264.51       103.04 o
   3   6 -19        750.66        831.90        71.10 o
   4   6 -19        358.23        392.41        98.75 o
   5   6 -19         80.56         77.73        17.69 o
   6   6 -19         86.28        -32.53        32.53 o
   7   6 -19        285.31        307.49        92.91 o
   8   6 -19       1146.83       1079.30        87.03 o
   9   6 -19          0.39         24.29        45.31 o
   1   7 -19        399.97        433.03        91.19 o
   2   7 -19        138.61        134.39        28.24 o
   3   7 -19        313.73        296.24        52.03 o
   4   7 -19         27.60         68.14        24.74 o
   5   7 -19         11.97        136.07        44.67 o
   6   7 -19          6.29         18.22        36.78 o
   7   7 -19        269.73        334.99        54.32 o
   8   7 -19         18.39          9.09        19.76 o
   1   8 -19         66.29        147.54        49.95 o
   2   8 -19        700.35        763.95       133.78 o
   3   8 -19          8.16         29.33        22.65 o
   4   8 -19        133.89         88.89        20.67 o
   5   8 -19        126.60        135.92        41.82 o
   1   9 -19        338.69        283.17        60.56 o
   2   9 -19        113.08         20.21        41.24 o
   3   9 -19        554.32        491.49        90.66 o
   4   9 -19         47.75        137.08        36.01 o
   0   0 -18       6628.89       6464.96       398.47 o
   2   0 -18        461.05        370.84        77.03 o
   4   0 -18       1129.66       1106.74       117.06 o
   6   0 -18        462.96        483.42        81.75 o
   8   0 -18        444.77        368.26       109.20 o
  10   0 -18       1369.57       1585.74       195.17 o
  12   0 -18        226.76        519.29       132.44 o
  14   0 -18        164.36        253.25        88.29 o
   0   1 -18        731.90        906.42       102.97 o
   1   1 -18       1179.41       1422.30        91.55 o
   2   1 -18         26.01         59.54        15.59 o
   3   1 -18        954.61       1064.87        74.19 o
   4   1 -18        606.13        701.69        65.32 o
   5   1 -18       1964.33       2160.31       106.33 o
   6   1 -18        198.44        197.50        33.69 o
   7   1 -18        363.34        311.85        53.26 o
   8   1 -18        205.99        179.02        42.04 o
   9   1 -18       1559.10       1562.66       187.62 o
  10   1 -18         24.32         23.84        18.05 o
  11   1 -18        156.84        189.40        33.93 o
  12   1 -18          8.09         55.39        65.64 o
  13   1 -18         10.75         23.23        33.69 o
   0   2 -18        809.55       1040.84       113.64 o
   1   2 -18       1328.30       1690.37        94.69 o
   2   2 -18        247.60        379.56        39.83 o
   3   2 -18        175.16        166.47        32.10 o
   4   2 -18        647.24        600.70        56.84 o
   5   2 -18        336.91        308.12        51.76 o
   6   2 -18        402.20        443.93        71.57 o
   7   2 -18         47.26        125.60        19.62 o
   8   2 -18        187.59        166.04        27.95 o
   9   2 -18        357.59        515.12        98.23 o
  10   2 -18        621.22        552.09        98.17 o
  11   2 -18        617.85        632.85       109.33 o
  12   2 -18         11.81         55.76        39.50 o
  13   2 -18        268.83        185.60        56.92 o
   0   3 -18        540.44        699.41       105.95 o
   1   3 -18        467.76        499.10        47.55 o
   2   3 -18        632.96        663.73        64.09 o
   3   3 -18        343.39        408.87        43.04 o
   4   3 -18        984.30       1166.08        95.23 o
   5   3 -18        563.37        804.32       128.25 o
   6   3 -18        517.17        498.22        92.31 o
   7   3 -18        130.97        123.17        21.12 o
   8   3 -18        190.42        257.00        35.36 o
   9   3 -18        342.42        359.15        38.75 o
  10   3 -18        619.62        516.11        81.50 o
  11   3 -18         65.59         70.41        41.82 o
  12   3 -18         68.73         91.91        22.13 o
  13   3 -18        376.82        547.17       128.95 o
   0   4 -18        123.12        188.20        41.82 o
   1   4 -18        841.63        780.49        70.35 o
   2   4 -18         90.70         78.14        20.42 o
   3   4 -18        193.81        436.86        49.57 o
   4   4 -18        338.60        312.42        61.86 o
   5   4 -18       1205.42       1237.57       132.61 o
   6   4 -18        290.10        337.74        54.15 o
   7   4 -18        240.67        207.08        32.91 o
   8   4 -18          9.38         -0.64        16.73 o
   9   4 -18        849.63        971.77       114.30 o
  10   4 -18         25.38         38.59        28.26 o
  11   4 -18        333.65        295.65        47.63 o
  12   4 -18         19.11         -7.86        37.76 o
   0   5 -18       3245.93       3378.63       198.00 o
   1   5 -18         39.19        107.87        38.50 o
   2   5 -18        127.30        116.18        35.87 o
   3   5 -18         53.47         53.60        18.86 o
   4   5 -18         50.19         80.37        18.78 o
   5   5 -18        343.36        424.52        56.52 o
   6   5 -18        864.51       1032.81       115.02 o
   7   5 -18        125.89        140.81        24.37 o
   8   5 -18         68.57        141.15        26.70 o
   9   5 -18        207.30        173.09        35.05 o
  10   5 -18        997.89       1184.69        98.91 o
  11   5 -18         15.17        -16.45        21.70 o
  12   5 -18         27.88        172.67        65.64 o
   0   6 -18        710.69       1074.59       228.86 o
   1   6 -18        353.62        356.60        36.66 o
   2   6 -18        531.01        631.45        63.05 o
   3   6 -18        169.54        326.08        51.12 o
   4   6 -18        456.32        677.71        66.64 o
   5   6 -18        139.28        199.20        49.13 o
   6   6 -18        406.04        445.40        83.05 o
   7   6 -18        654.98        688.47        85.60 o
   8   6 -18         84.45         74.81        23.66 o
   9   6 -18        138.78        178.07        29.86 o
  10   6 -18        140.83        197.82        77.25 o
  11   6 -18        303.87        250.52        34.12 o
   0   7 -18        689.60        519.29       132.44 o
   1   7 -18        546.65        732.42       122.73 o
   2   7 -18        225.44        125.77        27.39 o
   3   7 -18         29.91         32.67        17.22 o
   4   7 -18        130.77         65.49        42.34 o
   5   7 -18        426.12        485.94        51.42 o
   6   7 -18         94.26        209.14        45.21 o
   7   7 -18         91.18         81.02        21.84 o
   8   7 -18         59.85         24.09        31.14 o
   9   7 -18        277.76        295.07        30.67 o
  10   7 -18        206.54        224.10        70.28 o
   0   8 -18        560.67        638.94       154.51 o
   1   8 -18          2.60         25.03        26.72 o
   2   8 -18          0.54         36.01        30.20 o
   3   8 -18         49.04         74.54        19.26 o
   4   8 -18       1584.22       1730.64       156.83 o
   5   8 -18         36.22        137.16        29.55 o
   6   8 -18        177.94        156.59        50.53 o
   7   8 -18         74.29         45.12        22.65 o
   8   8 -18        135.35         76.56        33.11 o
   0   9 -18       1131.02       1035.09       224.21 o
   1   9 -18        518.57        645.58       116.11 o
   2   9 -18        130.58        113.32        29.20 o
   3   9 -18         36.62         89.53        34.27 o
   4   9 -18        403.54        405.69        93.23 o
   5   9 -18       1308.38       1339.44       151.81 o
   6   9 -18          7.84         50.97        25.43 o
   7   9 -18         60.91        142.89        45.31 o
   0  10 -18        124.96         24.40        45.31 o
   1  10 -18         57.40        120.78        60.99 o
   2  10 -18         87.68        157.99        37.17 o
   3  10 -18        196.78         73.22        32.07 o
   2   0 -17       3229.95       3201.36       191.68 o
   4   0 -17       1137.93       1077.63       115.19 o
   6   0 -17       3279.93       3042.75       184.16 o
   8   0 -17       6186.13       6784.43       443.78 o
  10   0 -17         58.09         41.82        22.07 o
  12   0 -17        485.21        503.02       130.11 o
  14   0 -17        269.70        157.24        36.94 o
   1   1 -17       1504.57       1788.12        99.42 o
   2   1 -17        477.70        436.59        59.57 o
   3   1 -17       1425.12       1472.06        89.29 o
   4   1 -17          4.54         59.49        20.29 o
   5   1 -17        305.75        345.34        49.83 o
   6   1 -17       1332.26       1416.95        83.36 o
   7   1 -17       1102.17       1155.23       101.45 o
   8   1 -17       1623.50       1504.58       101.31 o
   9   1 -17        932.37        883.53       133.89 o
  10   1 -17        262.91        118.44        76.09 o
  11   1 -17        655.92        815.91       129.76 o
  12   1 -17        144.89        309.26        52.72 o
  13   1 -17        510.82        526.11       105.72 o
  14   1 -17        258.01        221.44        59.04 o
  15   1 -17        135.30        136.47        22.23 o
   1   2 -17         35.73         75.22        19.03 o
   2   2 -17        588.12        639.88        72.85 o
   3   2 -17        381.74        365.24        52.22 o
   4   2 -17         74.28         82.66        23.64 o
   5   2 -17        233.62        319.73        59.72 o
   6   2 -17        396.97        349.15        63.82 o
   7   2 -17       1179.22       1183.74       107.80 o
   8   2 -17        884.26        930.68       108.98 o
   9   2 -17        706.38        757.99        81.47 o
  10   2 -17        267.59        265.32        62.15 o
  11   2 -17        181.95        162.46        47.31 o
  12   2 -17        347.29        312.89        60.99 o
  13   2 -17        374.36        340.96        61.19 o
  14   2 -17         12.74         32.27        20.09 o
   1   3 -17         48.87         85.79        21.19 o
   2   3 -17        569.05        618.26        59.55 o
   3   3 -17        409.73        442.44        56.03 o
   4   3 -17        246.31        214.60        45.64 o
   5   3 -17        720.67        745.02        97.68 o
   6   3 -17        819.98        961.39       112.20 o
   7   3 -17        414.09        355.30        86.57 o
   8   3 -17       1650.44       1677.48       124.05 o
   9   3 -17         34.60         84.99        25.23 o
  10   3 -17          3.33         32.34        34.27 o
  11   3 -17        252.43        378.72       104.55 o
  12   3 -17        342.32        588.99        81.32 o
  13   3 -17         62.92         69.67        19.26 o
  14   3 -17        142.35        140.64        67.96 o
   1   4 -17        188.35        185.88        32.02 o
   2   4 -17        313.29        266.97        40.27 o
   3   4 -17       2291.48       2466.03       142.63 o
   4   4 -17         79.58         37.36        15.37 o
   5   4 -17         74.35        151.87        30.21 o
   6   4 -17        295.78        277.41        47.73 o
   7   4 -17       1375.64       1444.88       104.08 o
   8   4 -17         82.81         72.11        22.98 o
   9   4 -17        237.65        203.66        36.19 o
  10   4 -17        147.30        157.00        20.55 o
  11   4 -17        262.53        288.35        30.99 o
  12   4 -17         88.70        108.12        21.06 o
  13   4 -17        401.98        354.84        67.96 o
  14   4 -17         68.16         13.94        27.88 o
   1   5 -17          9.23          5.40        45.31 o
   2   5 -17       1574.25       1555.41       110.60 o
   3   5 -17        124.32        104.75        26.90 o
   4   5 -17        899.47       1114.89       106.95 o
   5   5 -17        624.16        650.92       195.75 o
   6   5 -17         47.12        127.08        58.98 o
   7   5 -17        439.50        361.17        55.51 o
   8   5 -17        800.47        774.82       134.16 o
   9   5 -17         40.17         70.88        23.27 o
  10   5 -17        206.85        305.27        45.89 o
  11   5 -17         37.35         38.07        17.19 o
  12   5 -17        656.36        473.61        85.79 o
  13   5 -17         38.77         16.42        19.87 o
   1   6 -17       1158.77       1099.06       100.19 o
   2   6 -17        721.38        655.35        71.06 o
   3   6 -17        800.87        894.61        86.95 o
   4   6 -17        216.88        158.37        30.42 o
   5   6 -17         53.76         39.08        21.46 o
   6   6 -17        236.02        228.32        38.72 o
   7   6 -17         85.50         65.78        21.46 o
   8   6 -17        222.83        292.61        59.93 o
   9   6 -17        279.92        324.98        69.07 o
  10   6 -17         54.16        147.79        27.71 o
  11   6 -17         78.15         90.50        38.03 o
  12   6 -17        118.55        104.18        35.43 o
   1   7 -17       1354.34       1594.25       108.52 o
   2   7 -17        196.04        232.48        64.88 o
   3   7 -17       2981.36       3058.16       161.81 o
   4   7 -17        311.31        294.47        62.30 o
   5   7 -17         39.94         55.51        23.82 o
   6   7 -17        479.65        477.30        51.79 o
   7   7 -17        102.66        188.35        89.45 o
   8   7 -17        275.17        187.76        27.94 o
   9   7 -17         66.65         81.83        31.88 o
  10   7 -17         30.71         80.80        26.14 o
  11   7 -17        222.66        181.25        92.94 o
   1   8 -17         42.65         73.78        40.08 o
   2   8 -17        813.54        927.15       153.19 o
   3   8 -17        329.95        224.91        87.71 o
   4   8 -17        943.82       1046.16       217.82 o
   5   8 -17        137.27         82.94        34.85 o
   6   8 -17        436.19        384.95        73.77 o
   7   8 -17        120.55        105.62        45.89 o
   8   8 -17        717.69        889.27       147.35 o
   9   8 -17          2.44        -22.03        51.12 o
  10   8 -17         75.72         39.37        44.15 o
   1   9 -17        337.86        303.40       130.11 o
   2   9 -17        322.65        297.79        76.12 o
   3   9 -17        307.24        224.65       177.74 o
   4   9 -17         25.22        108.04        47.63 o
   5   9 -17         24.70         74.07        45.31 o
   6   9 -17         31.91        200.48        96.42 o
   7   9 -17        830.27        842.94       119.77 o
   8   9 -17        125.78        160.88        40.46 o
   1  10 -17         86.12         73.19        22.86 o
   2  10 -17        308.56        320.45        93.52 o
   3  10 -17        223.00        200.69        56.09 o
   4  10 -17        183.17         87.79        23.67 o
   5  10 -17         35.64         29.59        87.13 o
   6  10 -17         64.47        131.57        27.31 o
   1  11 -17        159.35        138.05        38.50 o
   2  11 -17        150.38        142.72        60.41 o
   0   0 -16       1709.50       1844.81       206.79 o
   2   0 -16        114.28        112.07        44.98 o
   4   0 -16       2057.75       2282.82       157.29 o
   6   0 -16       2440.69       2693.12       167.90 o
   8   0 -16        177.50        179.01        66.22 o
  10   0 -16       2413.05       2712.97       199.82 o
  12   0 -16        692.33        600.10       109.93 o
  14   0 -16       1062.14       1386.97       134.31 o
  16   0 -16        241.19        274.35        37.87 o
   0   1 -16       1527.34       1757.17       138.56 o
   1   1 -16       1311.30       1470.05        91.10 o
   2   1 -16        107.74        176.99        39.52 o
   3   1 -16       2389.66       2361.20       113.48 o
   4   1 -16       1566.17       1648.13        93.84 o
   5   1 -16       1550.98       1687.66        95.11 o
   6   1 -16        257.15        333.18        50.91 o
   7   1 -16         10.91          9.82        16.31 o
   8   1 -16        611.88        595.33        81.85 o
   9   1 -16       1156.74       1156.22        83.41 o
  10   1 -16        150.05        223.35        29.06 o
  11   1 -16       1767.52       1646.21       102.20 o
  12   1 -16        345.99        409.51        50.97 o
  13   1 -16         84.05        183.77        26.66 o
  14   1 -16         80.47        124.57        38.95 o
  15   1 -16        291.47        303.73        33.53 o
   0   2 -16        725.55        750.70       114.69 o
   1   2 -16         29.72         30.22        16.01 o
   2   2 -16        150.08        144.45        32.36 o
   3   2 -16       1595.64       1635.22        93.36 o
   4   2 -16        420.71        529.02        53.32 o
   5   2 -16       2295.82       1981.57       100.98 o
   6   2 -16       1252.13       1262.13       109.03 o
   7   2 -16       1301.79       1560.04       109.18 o
   8   2 -16        112.62        207.77        44.40 o
   9   2 -16        916.05        994.19        85.19 o
  10   2 -16       1304.25       1223.11        89.60 o
  11   2 -16        359.95        190.60        42.73 o
  12   2 -16        106.73         78.37        20.62 o
  13   2 -16        437.41        301.42        55.99 o
  14   2 -16        117.04        151.31        43.88 o
  15   2 -16        603.95        461.19        73.95 o
   0   3 -16       3751.97       4052.36       211.18 o
   1   3 -16        311.52        369.15        55.25 o
   2   3 -16        470.48        475.73        62.29 o
   3   3 -16        216.46        278.42        43.90 o
   4   3 -16        526.89        496.41        50.83 o
   5   3 -16        508.75        520.89        77.18 o
   6   3 -16       1361.87       1562.40       111.27 o
   7   3 -16        284.96        261.91        51.20 o
   8   3 -16        328.21        309.57        53.81 o
   9   3 -16         74.35        113.54        35.52 o
  10   3 -16        971.65        907.86        76.26 o
  11   3 -16        106.73         94.76        18.27 o
  12   3 -16        182.59        205.65        33.41 o
  13   3 -16        151.31        165.23        36.21 o
  14   3 -16        335.54        174.77        61.73 o
  15   3 -16         50.37         40.87        31.62 o
   0   4 -16       1330.08       1503.04       135.53 o
   1   4 -16       1714.64       1779.28        96.98 o
   2   4 -16        572.80        580.93        56.73 o
   3   4 -16        743.35        697.44        63.26 o
   4   4 -16        916.53       1050.81       116.34 o
   5   4 -16        898.09        960.59       112.95 o
   6   4 -16         60.47         65.59        21.43 o
   7   4 -16        793.41        841.53       140.36 o
   8   4 -16        100.51         35.45        17.67 o
   9   4 -16       2648.77       2702.18       152.40 o
  10   4 -16         87.08         91.42        85.90 o
  11   4 -16        183.87        175.47        24.14 o
  12   4 -16          1.40         46.68        34.18 o
  13   4 -16         23.51         38.57        39.50 o
  14   4 -16        106.52         70.32        20.84 o
  15   4 -16         71.73        139.89        42.98 o
   0   5 -16       3541.70       3367.98       191.47 o
   1   5 -16        141.87        127.64        40.58 o
   2   5 -16        133.85        267.89        53.14 o
   3   5 -16        607.57        706.95        94.33 o
   4   5 -16       3146.91       3436.69       171.50 o
   5   5 -16        484.71        555.21        79.99 o
   6   5 -16        591.47        678.05        95.94 o
   7   5 -16        225.21        170.52        33.95 o
   8   5 -16        550.40        665.86        92.83 o
   9   5 -16        150.77        198.65        49.95 o
  10   5 -16       1089.25       1167.62        94.81 o
  11   5 -16         61.79         99.98        29.28 o
  12   5 -16        615.11        460.37        61.79 o
  13   5 -16          6.32         74.15        46.32 o
  14   5 -16        416.00        417.79        71.40 o
   0   6 -16       1514.61       1252.72       144.05 o
   1   6 -16       1464.76       1522.73        91.70 o
   2   6 -16        581.40        594.16        80.80 o
   3   6 -16        262.45        260.32        43.93 o
   4   6 -16       1734.52       1772.79       121.89 o
   5   6 -16        223.40        209.96        55.11 o
   6   6 -16        333.98        468.51        70.73 o
   7   6 -16         88.98        125.45        25.78 o
   8   6 -16         36.08         35.54        17.43 o
   9   6 -16        543.89        585.65        82.10 o
  10   6 -16        545.66        591.94        59.43 o
  11   6 -16        289.92        237.94        31.42 o
  12   6 -16        237.55        342.56        38.07 o
  13   6 -16        114.80        162.22        44.15 o
   0   7 -16        255.67         62.73        46.47 o
   1   7 -16        738.44        791.99        80.74 o
   2   7 -16        243.54        283.58        52.87 o
   3   7 -16        104.94        164.47        33.77 o
   4   7 -16        136.70        214.50        43.88 o
   5   7 -16       2197.65       2579.77       148.02 o
   6   7 -16        182.72        337.53        70.88 o
   7   7 -16         43.83         54.54        37.50 o
   8   7 -16        111.90        100.61        18.93 o
   9   7 -16        179.05         95.29        28.52 o
  10   7 -16         10.29         18.35        28.15 o
  11   7 -16        373.30        334.21        77.85 o
  12   7 -16         31.97         52.93        20.40 o
   0   8 -16       1193.10       1423.10       275.33 o
   1   8 -16         60.38        187.37        58.55 o
   2   8 -16        438.36        449.26        98.90 o
   3   8 -16        151.88        167.33        41.87 o
   4   8 -16        797.31       1054.55       143.82 o
   5   8 -16         22.79         13.65        17.28 o
   6   8 -16        255.63        265.37        90.03 o
   7   8 -16         12.75         67.38        23.23 o
   8   8 -16        392.04        451.75        73.66 o
   9   8 -16         22.56         -7.99        35.63 o
  10   8 -16        600.14        814.73       118.87 o
  11   8 -16         22.14         11.62        69.70 o
   0   9 -16         92.09         95.26        40.66 o
   1   9 -16        509.31        397.32       178.32 o
   2   9 -16        118.67         94.45        41.16 o
   3   9 -16         12.16         12.11        17.86 o
   4   9 -16        160.42        162.25        37.02 o
   5   9 -16       1096.49       1187.75       151.34 o
   6   9 -16        101.02         48.32        27.22 o
   7   9 -16          6.09          6.12        20.88 o
   8   9 -16         55.27         57.84        18.01 o
   9   9 -16        617.32        529.86        85.03 o
  10   9 -16        366.57        368.44        67.28 o
   0  10 -16        154.18         94.10        33.69 o
   1  10 -16        343.85        360.82        63.78 o
   2  10 -16         20.82         -4.69        21.29 o
   3  10 -16        211.86        139.84        23.29 o
   4  10 -16        526.20        614.81       102.52 o
   5  10 -16        333.93        156.99        46.79 o
   6  10 -16        825.98        950.29       136.13 o
   7  10 -16         58.63         88.68        27.75 o
   8  10 -16         91.22        122.45        29.07 o
   0  11 -16         78.22         99.91        54.60 o
   1  11 -16         47.04         -4.69        34.85 o
   2  11 -16         33.10        -11.84        21.85 o
   3  11 -16         96.80         18.99        26.45 o
   4  11 -16        198.07        250.45        51.70 o
   5  11 -16        529.53        374.33        89.48 o
   6  11 -16        662.73        751.77       132.02 o
   2   0 -15        905.86        905.71       124.04 o
   4   0 -15        884.00        745.19       105.84 o
   6   0 -15       1145.49       1103.35        93.06 o
   8   0 -15       2347.55       2570.00       138.51 o
  10   0 -15        185.78        217.99        62.51 o
  12   0 -15        910.69       1098.31       165.11 o
  14   0 -15        378.52        383.68        88.31 o
  16   0 -15        439.38        288.11        68.54 o
   1   1 -15       1882.45       2103.03       107.58 o
   2   1 -15       2652.76       2681.27       120.05 o
   3   1 -15       2138.53       2154.25       107.58 o
   4   1 -15        534.43        545.02        68.40 o
   5   1 -15        511.31        523.58        63.93 o
   6   1 -15        253.08        296.79        36.20 o
   7   1 -15       1472.37       1583.12        82.43 o
   8   1 -15        245.53        258.66        38.76 o
   9   1 -15       1962.12       1878.97        94.21 o
  10   1 -15        135.78        126.14        33.75 o
  11   1 -15        198.96        220.24        40.95 o
  12   1 -15         66.83         70.06        29.95 o
  13   1 -15       1274.26       1297.30        96.83 o
  14   1 -15         56.05         78.84        31.36 o
  15   1 -15        207.41        237.48        42.42 o
  16   1 -15         54.28         57.60        26.66 o
   1   2 -15       2251.85       2159.35       106.75 o
   2   2 -15       1141.80       1345.56        92.82 o
   3   2 -15        853.46        963.22        81.78 o
   4   2 -15       2444.19       2508.66       116.71 o
   5   2 -15        413.53        423.37        58.30 o
   6   2 -15        102.36        157.11        30.00 o
   7   2 -15       1859.24       2019.94       111.59 o
   8   2 -15       1380.22       1347.47        82.62 o
   9   2 -15        367.52        395.47        53.75 o
  10   2 -15        433.39        573.04        68.74 o
  11   2 -15        308.11        275.63        47.73 o
  12   2 -15        871.35       1006.18        93.65 o
  13   2 -15        493.84        560.24        69.32 o
  14   2 -15         92.23         89.00        16.94 o
  15   2 -15        131.66        155.28        33.20 o
  16   2 -15        157.97        145.17        21.72 o
   1   3 -15        109.36         97.77        28.81 o
   2   3 -15       1858.40       1994.77       115.87 o
   3   3 -15        152.26        120.67        31.61 o
   4   3 -15        470.16        578.65        67.06 o
   5   3 -15       1129.93       1132.17        84.26 o
   6   3 -15        616.39        621.48        89.45 o
   7   3 -15        241.86        208.79        44.42 o
   8   3 -15       4613.10       4606.76       176.31 o
   9   3 -15        252.96        276.92        40.46 o
  10   3 -15        103.88         80.94        20.68 o
  11   3 -15        920.61        893.06        71.58 o
  12   3 -15        687.25        630.39        73.63 o
  13   3 -15        225.58        119.04        29.18 o
  14   3 -15        242.89        212.03        35.88 o
  15   3 -15        268.40        284.20        63.72 o
  16   3 -15        272.65        253.49        54.98 o
   1   4 -15       2388.26       2357.94       111.09 o
   2   4 -15         39.79         54.30        30.18 o
   3   4 -15       2078.34       2076.32       103.78 o
   4   4 -15        874.22        966.26       112.55 o
   5   4 -15         56.37         60.06        28.05 o
   6   4 -15        467.28        512.85        80.38 o
   7   4 -15       1734.69       1663.86       132.87 o
   8   4 -15         30.29        243.96        90.61 o
   9   4 -15        198.30        189.23        51.24 o
  10   4 -15         41.92        105.23        32.23 o
  11   4 -15       1277.56       1267.93        89.79 o
  12   4 -15          2.25         35.42        16.43 o
  13   4 -15        141.37        163.78        25.42 o
  14   4 -15         47.91        199.32        28.75 o
  15   4 -15         29.36         41.82        17.86 o
   1   5 -15          2.44          9.14        20.91 o
   2   5 -15       2717.01       2663.23       118.52 o
   3   5 -15       1417.49       1538.52       127.88 o
   4   5 -15       1064.40       1256.76       116.49 o
   5   5 -15        565.52        615.97        90.43 o
   6   5 -15        898.46        771.10       103.62 o
   7   5 -15        327.55        339.48        61.82 o
   8   5 -15        302.84        386.59        69.23 o
   9   5 -15        520.71        486.24        75.33 o
  10   5 -15        316.72        224.36        38.52 o
  11   5 -15        135.37        105.07        63.10 o
  12   5 -15        640.05        669.16        59.67 o
  13   5 -15         74.55        159.39        37.73 o
  14   5 -15        137.54        105.60        58.09 o
  15   5 -15         10.10         72.88        80.74 o
   1   6 -15        673.19        713.29        64.41 o
   2   6 -15        474.26        457.34        71.27 o
   3   6 -15       1140.45       1080.25       105.87 o
   4   6 -15       1191.07       1628.85       115.55 o
   5   6 -15         19.91         70.15        20.78 o
   6   6 -15        721.12        808.50       104.38 o
   7   6 -15       1356.19       1346.83       101.48 o
   8   6 -15        149.15        141.40        32.32 o
   9   6 -15        452.87        405.53        81.52 o
  10   6 -15         87.05        178.19        30.43 o
  11   6 -15        189.34        140.99        19.79 o
  12   6 -15        611.25        604.99        89.14 o
  13   6 -15        379.83        569.24        74.35 o
  14   6 -15        232.02        292.75        75.51 o
   1   7 -15        690.07        728.85        72.64 o
   2   7 -15        484.85        515.66        76.15 o
   3   7 -15       1272.94       1288.45       105.57 o
   4   7 -15        248.67        277.24        46.55 o
   5   7 -15         26.62         67.07        20.78 o
   6   7 -15        621.42        708.09        87.92 o
   7   7 -15        600.51        726.37        88.44 o
   8   7 -15        205.14        237.34        45.68 o
   9   7 -15        509.64        541.14        95.78 o
  10   7 -15        119.56         70.32        32.18 o
  11   7 -15        219.20        171.18        32.04 o
  12   7 -15         30.83         91.66        38.85 o
  13   7 -15       1260.01       1332.48       103.21 o
   1   8 -15        368.87        414.04        91.99 o
   2   8 -15       2438.65       2613.89       170.62 o
   3   8 -15         30.38         56.66        26.56 o
   4   8 -15        374.92        450.08        85.53 o
   5   8 -15         45.57         33.87        27.06 o
   6   8 -15        273.95        267.41        62.95 o
   7   8 -15        248.78        136.65        42.07 o
   8   8 -15       1411.21       1490.94       173.14 o
   9   8 -15        175.62        209.70        54.13 o
  10   8 -15          7.90         48.69        33.16 o
  11   8 -15         44.65         31.20        31.37 o
  12   8 -15        751.83        748.78       101.95 o
   1   9 -15        616.41        522.68        94.33 o
   2   9 -15        342.69        428.36        84.95 o
   3   9 -15       1551.75       1819.77       149.75 o
   4   9 -15        104.10         87.80        37.63 o
   5   9 -15        130.20        147.41        43.77 o
   6   9 -15         18.83        -18.59        47.63 o
   7   9 -15       1093.24       1176.21       120.73 o
   8   9 -15        285.93        389.31        66.10 o
   9   9 -15        458.35        540.77        85.73 o
  10   9 -15         11.98          7.49        21.47 o
  11   9 -15        365.08        366.42        60.07 o
   1  10 -15          5.54         27.63        26.07 o
   2  10 -15        144.43        200.54        39.28 o
   3  10 -15        752.68        811.11       121.58 o
   4  10 -15         63.46         54.54        26.00 o
   5  10 -15        116.57        102.05        76.09 o
   6  10 -15        812.22        869.39       129.89 o
   7  10 -15        715.10        629.24       101.84 o
   8  10 -15        646.34        583.70        93.66 o
   9  10 -15        104.27         69.88        28.53 o
  10  10 -15         49.94          2.26        27.09 o
   1  11 -15         65.91         65.09        20.36 o
   2  11 -15        332.65        370.79        69.31 o
   3  11 -15         48.43         15.67        26.42 o
   4  11 -15        172.52        103.08        21.03 o
   5  11 -15         10.35         86.51        37.11 o
   6  11 -15        536.13        712.34       112.99 o
   7  11 -15         70.25         55.70        24.08 o
   8  11 -15        538.33        505.18        91.52 o
   1  12 -15        200.49        238.40       119.08 o
   2  12 -15         46.64         17.75        19.91 o
   3  12 -15        124.03        149.78        42.50 o
   4  12 -15         87.17        116.73        66.80 o
   0   0 -14       3309.44       3082.04       246.28 o
   2   0 -14       1526.09       1353.08       123.14 o
   4   0 -14       4139.57       4181.82       174.59 o
   6   0 -14        870.62        809.76       114.57 o
   8   0 -14        880.13       1007.35        92.35 o
  10   0 -14       4041.09       4182.32       246.27 o
  12   0 -14        673.04        767.11       132.56 o
  14   0 -14       1076.04       1249.01       143.77 o
  16   0 -14        637.76        863.58       102.73 o
   0   1 -14        627.66        676.39       104.32 o
   1   1 -14       1840.90       1802.41       101.15 o
   2   1 -14        894.80        984.99        88.45 o
   3   1 -14        718.92        723.15        67.66 o
   4   1 -14        803.74        776.45        66.72 o
   5   1 -14       2541.24       2813.06       102.05 o
   6   1 -14         49.36         40.78        12.29 o
   7   1 -14        823.23        851.05        60.73 o
   8   1 -14        281.08        370.86        51.09 o
   9   1 -14        674.02        759.25        76.33 o
  10   1 -14        587.57        682.92        56.95 o
  11   1 -14       1060.67       1118.11       101.72 o
  12   1 -14        436.53        551.15        75.87 o
  13   1 -14        366.11        398.95        60.54 o
  14   1 -14        228.34        257.28        39.90 o
  15   1 -14       1131.96       1427.44        99.84 o
  16   1 -14        442.00        519.21        68.57 o
  17   1 -14          1.24         28.45        25.99 o
   0   2 -14        480.91        403.10       110.94 o
   1   2 -14       2828.71       2964.98       122.94 o
   2   2 -14       2386.63       2407.99       112.28 o
   3   2 -14        405.50        395.41        50.15 o
   4   2 -14       1621.43       1691.06        80.21 o
   5   2 -14       2583.22       2426.69        94.12 o
   6   2 -14       1104.21       1186.19        68.30 o
   7   2 -14        566.34        560.65        66.03 o
   8   2 -14         57.81         60.03        20.30 o
   9   2 -14       2432.99       2472.16       113.74 o
  10   2 -14       1142.59       1167.67        85.11 o
  11   2 -14         93.44         96.66        33.43 o
  12   2 -14         38.58         64.92        35.21 o
  13   2 -14          2.41         31.77        14.37 o
  14   2 -14        403.85        355.24        60.34 o
  15   2 -14        542.80        611.66        79.43 o
  16   2 -14         18.53         83.73        27.98 o
  17   2 -14         17.21         56.03        31.28 o
   0   3 -14        860.55       1121.55       122.66 o
   1   3 -14       1401.50       1525.43        93.49 o
   2   3 -14        228.42        185.97        44.44 o
   3   3 -14        203.33        208.42        42.44 o
   4   3 -14       2879.87       2973.24       122.50 o
   5   3 -14        682.51        864.04        68.05 o
   6   3 -14       2910.49       2694.41       116.62 o
   7   3 -14         25.21         23.08        20.69 o
   8   3 -14        165.15        217.01        41.61 o
   9   3 -14        601.28        698.24        74.51 o
  10   3 -14       1856.18       2198.87       107.62 o
  11   3 -14        733.21        819.07        70.43 o
  12   3 -14          0.75          9.40        19.02 o
  13   3 -14         59.44         73.07        25.56 o
  14   3 -14        286.05        261.45        43.62 o
  15   3 -14        119.75        223.65        42.30 o
  16   3 -14        656.26        615.30        72.85 o
  17   3 -14         86.86        112.34        35.13 o
   0   4 -14        836.78        897.48       122.82 o
   1   4 -14       1689.06       1772.97        95.43 o
   2   4 -14       1021.36       1088.92        85.04 o
   3   4 -14        145.07        142.38        31.21 o
   4   4 -14         87.00         83.04        33.03 o
   5   4 -14       2820.57       2771.76       153.09 o
   6   4 -14         25.44         38.99        35.70 o
   7   4 -14       1951.92       2013.63       130.37 o
   8   4 -14         66.22        132.11        36.54 o
   9   4 -14       2184.11       2289.82       121.96 o
  10   4 -14        147.95        181.45        35.38 o
  11   4 -14        547.82        583.17        78.14 o
  12   4 -14        254.37        187.13        32.51 o
  13   4 -14        234.51        282.16        41.29 o
  14   4 -14        207.62        158.79        23.47 o
  15   4 -14        707.65        706.42        91.28 o
  16   4 -14        163.11        115.44        44.15 o
   0   5 -14       6019.65       5843.86       245.54 o
   1   5 -14        753.34        761.42        76.75 o
   2   5 -14         43.65         35.70        17.03 o
   3   5 -14        125.72        105.39        26.06 o
   4   5 -14       3211.30       3265.50       164.73 o
   5   5 -14        941.73       1126.92       122.13 o
   6   5 -14        149.25        244.37        55.33 o
   7   5 -14        157.44        158.68        42.46 o
   8   5 -14        271.07        270.98        54.27 o
   9   5 -14        161.54        132.72        25.32 o
  10   5 -14        849.31       1014.12        81.20 o
  11   5 -14        193.21        164.37        25.82 o
  12   5 -14        201.82        189.54        42.04 o
  13   5 -14         56.75         57.85        32.19 o
  14   5 -14        349.14        300.50        61.43 o
  15   5 -14        194.80        113.85        32.53 o
  16   5 -14        687.27        797.35        67.41 o
   0   6 -14       1858.11       2070.63       153.35 o
   1   6 -14       2981.70       2899.35       122.05 o
   2   6 -14        327.17        319.05        45.78 o
   3   6 -14        255.34        318.03        59.47 o
   4   6 -14       2196.58       2123.20       122.96 o
   5   6 -14        710.25        700.23        89.19 o
   6   6 -14         39.12         20.66        19.11 o
   7   6 -14        757.45        922.06       103.44 o
   8   6 -14        646.43        759.59        91.04 o
   9   6 -14        184.52        251.61        44.66 o
  10   6 -14        477.99        616.98        77.44 o
  11   6 -14        417.89        299.11        64.22 o
  12   6 -14         88.11         71.12        18.27 o
  13   6 -14        678.97        826.03        99.43 o
  14   6 -14        257.40        221.00        66.90 o
  15   6 -14        687.79        513.43        96.67 o
   0   7 -14       3713.88       3704.08       195.79 o
   1   7 -14       1924.94       1969.36        93.55 o
   2   7 -14        545.43        676.52        65.90 o
   3   7 -14       1574.08       1745.35       117.60 o
   4   7 -14        276.86        304.63        57.20 o
   5   7 -14       1200.43       1460.02       112.12 o
   6   7 -14        236.49        216.81        48.06 o
   7   7 -14        999.19       1057.42       113.84 o
   8   7 -14         42.93         31.52        38.85 o
   9   7 -14        227.88        205.26        46.90 o
  10   7 -14        115.55         53.51        50.53 o
  11   7 -14        615.19        595.63        95.92 o
  12   7 -14         42.41         63.40        20.40 o
  13   7 -14        213.20        231.12        54.48 o
  14   7 -14        513.35        615.11        80.76 o
   0   8 -14       3030.72       2927.74       222.07 o
   1   8 -14        179.95        241.89        68.40 o
   2   8 -14        775.34        758.28       110.20 o
   3   8 -14        203.63        210.02        55.84 o
   4   8 -14       1329.16       1487.68       165.65 o
   5   8 -14         23.13         59.67        34.51 o
   6   8 -14       1737.03       1644.70       157.42 o
   7   8 -14         32.37         98.43        29.38 o
   8   8 -14         63.37         36.54        49.37 o
   9   8 -14         70.74        131.14        33.20 o
  10   8 -14       1070.32       1053.86       138.77 o
  11   8 -14        334.19        242.84        72.00 o
  12   8 -14         63.57         -5.06        43.64 o
  13   8 -14        132.99         89.77        54.84 o
   0   9 -14        626.08        732.98       137.98 o
   1   9 -14        931.47       1004.68       116.62 o
   2   9 -14        251.92        286.17        65.85 o
   3   9 -14        341.91        295.69        63.63 o
   4   9 -14        119.42        144.30        46.06 o
   5   9 -14       1403.18       1377.28       142.68 o
   6   9 -14         81.70        174.55        66.22 o
   7   9 -14         67.55         54.93        49.09 o
   8   9 -14        114.16        120.46        38.25 o
   9   9 -14        828.84        923.62       129.19 o
  10   9 -14        315.43        291.30        82.76 o
  11   9 -14        180.95        163.48        56.48 o
  12   9 -14        245.24        246.65        62.89 o
   0  10 -14       1170.46       1204.03       179.32 o
   1  10 -14        100.47        109.72        41.33 o
   2  10 -14        883.76        908.49       133.63 o
   3  10 -14         32.39          5.24        22.59 o
   4  10 -14        420.81        363.61        75.66 o
   5  10 -14        584.69        616.99       107.52 o
   6  10 -14        257.85        273.41        97.30 o
   7  10 -14        255.33        240.58        57.80 o
   8  10 -14        264.22        217.28        50.67 o
   9  10 -14        205.98        201.41        48.40 o
  10  10 -14        837.12        835.89        86.65 o
  11  10 -14          7.47         77.20        28.76 o
   0  11 -14        612.96        916.59       216.08 o
   1  11 -14         40.00         -7.91        18.12 o
   2  11 -14        175.39        250.75        64.39 o
   3  11 -14        263.80        354.32       127.79 o
   4  11 -14        380.41        291.96       159.74 o
   5  11 -14        398.75        375.27        73.10 o
   6  11 -14        759.05        643.76       103.49 o
   7  11 -14         23.87         45.85        31.13 o
   8  11 -14         14.10         58.09        81.90 o
   9  11 -14        347.74        336.45        55.69 o
   0  12 -14         17.92         45.31        39.50 o
   1  12 -14        398.36        302.25        68.18 o
   2  12 -14        313.21        221.52        53.86 o
   3  12 -14         81.51         90.32        36.49 o
   4  12 -14        227.16        259.06        54.71 o
   5  12 -14        700.96        819.83       119.88 o
   6  12 -14         15.68        -30.77        30.77 o
   7  12 -14         22.27         27.95        30.20 o
   0  13 -14        516.54        585.51       157.99 o
   1  13 -14        271.21        186.84        46.15 o
   2  13 -14         43.46         75.92        60.41 o
   2   0 -13       6415.11       6420.42       228.73 o
   4   0 -13       3081.40       3030.73       144.90 o
   6   0 -13       3395.86       3325.71       152.64 o
   8   0 -13       2055.30       2189.77       124.06 o
  10   0 -13       1455.23       1345.52       149.71 o
  12   0 -13       1340.66       1542.99       192.26 o
  14   0 -13        278.41        234.67        58.61 o
  16   0 -13        666.69        775.08       119.91 o
  18   0 -13        811.48       1127.74       112.22 o
   1   1 -13       3343.10       3484.46       106.55 o
   2   1 -13        536.78        492.75        51.54 o
   3   1 -13       3741.54       3806.23       112.55 o
   4   1 -13        567.93        589.06        57.98 o
   5   1 -13        216.24        166.76        28.95 o
   6   1 -13        620.12        600.75        58.33 o
   7   1 -13       2472.00       2438.39        93.27 o
   8   1 -13       1141.74       1175.10        66.43 o
   9   1 -13        950.86       1083.38        75.98 o
  10   1 -13        152.02        179.04        34.60 o
  11   1 -13       1765.57       1879.39       113.12 o
  12   1 -13        148.06        203.16        41.46 o
  13   1 -13       1950.58       2124.66       147.39 o
  14   1 -13        822.00        909.96        98.14 o
  15   1 -13        440.40        514.16        78.47 o
  16   1 -13        622.98        913.12       118.84 o
  17   1 -13        403.98        391.50        59.85 o
  18   1 -13        133.80        186.67        42.42 o
   1   2 -13       1281.86       1288.36        87.38 o
   2   2 -13       2956.56       2872.56       104.02 o
   3   2 -13       1062.35       1121.21        65.31 o
   4   2 -13       3028.36       2959.84       100.47 o
   5   2 -13        134.72        109.61        32.95 o
   6   2 -13        446.68        515.96        57.57 o
   7   2 -13       1814.32       1929.48        81.32 o
   8   2 -13       2639.60       2784.12       117.71 o
   9   2 -13       1103.86       1270.75        86.70 o
  10   2 -13        118.04        125.47        29.00 o
  11   2 -13        355.81        288.38        46.47 o
  12   2 -13       1591.36       1722.13       107.97 o
  13   2 -13       1101.14       1181.38        98.52 o
  14   2 -13        101.23        154.72        26.06 o
  15   2 -13        118.59        134.11        31.21 o
  16   2 -13        435.17        336.38        47.88 o
  17   2 -13        451.15        493.74        51.81 o
  18   2 -13        294.10        234.31        39.89 o
   1   3 -13        211.07        214.69        46.73 o
   2   3 -13       5634.38       5595.52       161.90 o
   3   3 -13       1667.99       1744.74        82.84 o
   4   3 -13       2542.26       2480.72        98.13 o
   5   3 -13        254.09        220.91        38.06 o
   6   3 -13        232.82        288.97        37.09 o
   7   3 -13        285.97        258.32        45.88 o
   8   3 -13       2175.67       2106.92       103.64 o
   9   3 -13         20.37         17.63        18.44 o
  10   3 -13        283.96        282.20        43.93 o
  11   3 -13        290.88        321.89        48.63 o
  12   3 -13        641.68        689.54        73.38 o
  13   3 -13        162.81        201.86        28.40 o
  14   3 -13        423.51        518.29        72.58 o
  15   3 -13        260.14        430.16       105.73 o
  16   3 -13        659.34        599.09        83.84 o
  17   3 -13        449.51        429.34        47.47 o
   1   4 -13        744.41        684.96        73.40 o
   2   4 -13        221.57        242.75        47.72 o
   3   4 -13       5005.94       4868.77       151.24 o
   4   4 -13         64.55         57.55        23.32 o
   5   4 -13        151.07        105.62        37.40 o
   6   4 -13        710.96        613.07        79.76 o
   7   4 -13        982.46       1115.87       106.92 o
   8   4 -13        135.40         93.26        33.19 o
   9   4 -13       1298.91       1223.52        90.24 o
  10   4 -13        104.72        155.29        35.96 o
  11   4 -13       1055.08       1139.82        94.64 o
  12   4 -13         89.94        120.79        41.82 o
  13   4 -13        769.33        831.14        82.57 o
  14   4 -13         18.32         34.10        15.86 o
  15   4 -13          3.29         15.20        57.50 o
  16   4 -13        135.67        107.45        22.86 o
  17   4 -13        894.66        872.13       167.87 o
   1   5 -13         31.26         -3.47        22.59 o
   2   5 -13       2693.18       2684.13       114.95 o
   3   5 -13       1575.87       1480.62        83.19 o
   4   5 -13        147.50        172.08        53.08 o
   5   5 -13        455.67        312.14        67.85 o
   6   5 -13        258.92        260.97        46.60 o
   7   5 -13        682.93        552.14        82.68 o
   8   5 -13       2096.19       2195.90       115.96 o
   9   5 -13         48.22         75.56        29.95 o
  10   5 -13         75.70        112.25        26.03 o
  11   5 -13        363.82        330.08        47.65 o
  12   5 -13        769.18        825.32        83.65 o
  13   5 -13        143.77        153.27        25.44 o
  14   5 -13        872.19        845.20        83.26 o
  15   5 -13          0.51         27.30        37.10 o
  16   5 -13        573.68        661.83        75.61 o
  17   5 -13         15.04         44.15        33.69 o
   1   6 -13        938.89       1106.93        75.46 o
   2   6 -13       2515.23       2422.99       103.03 o
   3   6 -13        489.61        484.20        71.25 o
   4   6 -13        555.40        620.53        83.23 o
   5   6 -13        165.47         92.48        40.96 o
   6   6 -13        461.16        449.68        72.90 o
   7   6 -13        817.63        860.05        99.30 o
   8   6 -13        389.96        509.12        63.00 o
   9   6 -13        210.65        173.71        30.57 o
  10   6 -13         72.37         73.45        19.54 o
  11   6 -13        202.90        319.28        48.45 o
  12   6 -13        320.31        482.61        84.32 o
  13   6 -13        367.61        335.96        45.36 o
  14   6 -13        137.32        149.70        31.52 o
  15   6 -13         25.07        110.21        38.06 o
  16   6 -13        220.45        144.78        51.70 o
   1   7 -13        539.80        560.66        49.25 o
   2   7 -13         82.61         68.94        24.66 o
   3   7 -13       1859.06       2024.58       118.60 o
   4   7 -13         76.02        126.14        38.59 o
   5   7 -13        685.93        708.12        92.22 o
   6   7 -13        273.12        210.22        60.51 o
   7   7 -13        559.79        655.92       108.54 o
   8   7 -13        825.71        836.10       120.92 o
   9   7 -13        222.56        141.74        65.17 o
  10   7 -13          5.86         69.08        21.79 o
  11   7 -13        127.84        161.34        26.71 o
  12   7 -13        515.64        495.10        48.72 o
  13   7 -13       1010.98       1082.38        93.88 o
  14   7 -13          4.16         95.03        38.92 o
  15   7 -13        156.96        131.82        24.41 o
   1   8 -13        106.36        110.01        32.87 o
   2   8 -13       1010.28       1090.33       117.01 o
   3   8 -13        550.50        525.82        97.25 o
   4   8 -13       1041.72       1030.70       137.15 o
   5   8 -13        334.39        256.63        68.05 o
   6   8 -13       1699.92       1790.13       162.01 o
   7   8 -13         27.61        -13.09        14.69 o
   8   8 -13        590.56        695.38       111.51 o
   9   8 -13        276.68        281.17        67.37 o
  10   8 -13          2.33          8.55        22.28 o
  11   8 -13         37.75         70.10        25.15 o
  12   8 -13        899.35        976.52       103.15 o
  13   8 -13         95.86        116.19       137.66 o
  14   8 -13        290.31        194.63        69.12 o
   1   9 -13       1236.07       1081.88       118.74 o
   2   9 -13        232.49        334.07        59.49 o
   3   9 -13       1127.02       1512.60       168.82 o
   4   9 -13         82.83         97.72        32.62 o
   5   9 -13         34.91        -16.61        17.17 o
   6   9 -13         56.14         72.62        26.44 o
   7   9 -13       1857.43       1976.58       159.42 o
   8   9 -13        449.20        413.84        82.95 o
   9   9 -13        273.00        325.44        66.85 o
  10   9 -13         32.71        -13.54        19.41 o
  11   9 -13        274.69        169.85        43.56 o
  12   9 -13         64.81         24.04        18.66 o
  13   9 -13        583.22        564.07       100.09 o
   1  10 -13        662.85        618.77        89.25 o
   2  10 -13        905.94        875.44       127.06 o
   3  10 -13        221.79        237.40       114.91 o
   4  10 -13        190.89        278.77        74.20 o
   5  10 -13          2.21         67.38        34.85 o
   6  10 -13        390.74        362.11        74.63 o
   7  10 -13       1016.92       1065.35       142.27 o
   8  10 -13        156.54        166.49        65.64 o
   9  10 -13       1123.63       1236.20       152.34 o
  10  10 -13         76.45        125.86        22.02 o
  11  10 -13        576.11        399.51        63.38 o
  12  10 -13        297.58        454.71        58.16 o
   1  11 -13        259.36        175.73        41.00 o
   2  11 -13        279.78        339.14        84.29 o
   3  11 -13        202.74        254.13        51.49 o
   4  11 -13         83.92         73.22        27.94 o
   5  11 -13        212.19        104.30        31.90 o
   6  11 -13        460.86        444.85        87.33 o
   7  11 -13         29.50         32.54        24.40 o
   8  11 -13       1306.26       1442.01       146.10 o
   9  11 -13         96.19         40.83        21.00 o
  10  11 -13         38.33         29.14        28.50 o
   1  12 -13        262.15        330.91        59.10 o
   2  12 -13         69.80         89.45       102.81 o
   3  12 -13       1423.85       1419.64       188.66 o
   4  12 -13         11.75         90.32       116.75 o
   5  12 -13        250.17        177.62        38.56 o
   6  12 -13        129.88         77.34        48.86 o
   7  12 -13        236.57        191.81        32.16 o
   8  12 -13         64.79          1.25        26.46 o
   1  13 -13         55.34         43.08        32.80 o
   2  13 -13        776.99        748.63       106.35 o
   3  13 -13        291.85        248.49        61.64 o
   4  13 -13        387.25        303.96        45.73 o
   5  13 -13         70.47         10.44        24.37 o
   0   0 -12      22335.22      22100.61       458.89 o
   2   0 -12       1682.27       1661.76       102.20 o
   4   0 -12       2852.56       2815.82       133.55 o
   6   0 -12       1223.84       1264.44        96.38 o
   8   0 -12        739.84        768.97        79.72 o
  10   0 -12       4440.32       4188.66       169.51 o
  12   0 -12        302.82        288.01        78.04 o
  14   0 -12       2507.95       2662.39       191.80 o
  16   0 -12       1206.58       1406.41       135.89 o
  18   0 -12        328.72        426.86        73.93 o
   0   1 -12       2714.81       2642.25       106.84 o
   1   1 -12       7921.30       7547.96       139.27 o
   2   1 -12        270.87        250.10        37.89 o
   3   1 -12       1113.49       1187.64        64.08 o
   4   1 -12       2566.73       2638.91        92.20 o
   5   1 -12       1806.03       1906.58        92.80 o
   6   1 -12       1399.04       1350.86        67.12 o
   7   1 -12        462.82        427.16        46.87 o
   8   1 -12        512.61        528.29        47.83 o
   9   1 -12       1838.62       1848.83        82.45 o
  10   1 -12        103.86        127.43        33.42 o
  11   1 -12       1523.38       1549.89        85.33 o
  12   1 -12        610.08        686.37        84.10 o
  13   1 -12        563.07        611.95        82.05 o
  14   1 -12        337.49        440.52        60.33 o
  15   1 -12       1800.08       2085.34       118.04 o
  16   1 -12        104.70        115.16        64.34 o
  17   1 -12        259.90        236.00        52.13 o
  18   1 -12         33.38         44.82        30.28 o
   0   2 -12        685.75        676.84        81.07 o
   1   2 -12       2564.15       2619.37        97.23 o
   2   2 -12        620.43        701.26        58.91 o
   3   2 -12       1351.61       1386.40        67.57 o
   4   2 -12       5493.98       5633.85       133.29 o
   5   2 -12       4383.66       3807.52       153.52 o
   6   2 -12       3323.47       3406.63       104.84 o
   7   2 -12       1559.73       1520.95        71.58 o
   8   2 -12        594.09        570.88        68.32 o
   9   2 -12        585.90        679.67        72.31 o
  10   2 -12       3806.30       4006.41       140.28 o
  11   2 -12         31.44         69.30        17.38 o
  12   2 -12        210.52        156.59        26.30 o
  13   2 -12        397.71        560.81        75.16 o
  14   2 -12        794.28        785.75        92.59 o
  15   2 -12       1032.32       1111.42        81.72 o
  16   2 -12        200.64        275.56        47.79 o
  17   2 -12        242.50        245.26        39.67 o
  18   2 -12         49.73         85.03        37.80 o
   0   3 -12       6867.27       7181.41       248.21 o
   1   3 -12        331.40        353.18        47.19 o
   2   3 -12       1441.18       1378.02        73.61 o
   3   3 -12         38.42          8.73        17.25 o
   4   3 -12        607.53        634.57        54.76 o
   5   3 -12        745.88        700.15        54.17 o
   6   3 -12       3187.83       3169.22        99.58 o
   7   3 -12        909.56       1027.78        83.76 o
   8   3 -12        337.01        260.99        49.17 o
   9   3 -12       1429.52       1330.01        87.00 o
  10   3 -12       5594.14       5787.55       173.83 o
  11   3 -12        273.84        276.09        41.51 o
  12   3 -12        708.33        746.22        72.84 o
  13   3 -12        317.43        327.88        52.02 o
  14   3 -12       1613.66       1639.17       122.74 o
  15   3 -12        425.16        473.57        64.30 o
  16   3 -12        245.32        257.57        35.31 o
  17   3 -12         37.84         94.48        54.03 o
  18   3 -12         25.22         58.60        20.54 o
   0   4 -12        707.53        678.22        97.85 o
   1   4 -12       2028.75       1875.84        95.46 o
   2   4 -12         98.06        116.06        29.06 o
   3   4 -12        226.16        247.60        39.83 o
   4   4 -12        604.29        554.97        50.35 o
   5   4 -12       5186.02       5069.43       129.23 o
   6   4 -12        881.01        889.08        96.34 o
   7   4 -12        932.63       1008.79        92.82 o
   8   4 -12         93.86        100.68        32.14 o
   9   4 -12       3221.14       3223.97       133.62 o
  10   4 -12        695.65        650.55        69.18 o
  11   4 -12       1133.07       1169.82        83.97 o
  12   4 -12         83.94        103.66        42.09 o
  13   4 -12        132.75        142.16        33.76 o
  14   4 -12        101.17        183.61        33.38 o
  15   4 -12       1125.03       1226.34        98.98 o
  16   4 -12         22.71         55.45        30.32 o
  17   4 -12         25.32         49.90        27.30 o
  18   4 -12         50.68         70.28        91.19 o
   0   5 -12        813.27        724.39       102.06 o
   1   5 -12        594.92        595.21        62.44 o
   2   5 -12       1668.86       1678.63        86.55 o
   3   5 -12       1243.86       1269.57        71.44 o
   4   5 -12       2248.25       2145.32        84.60 o
   5   5 -12        123.96        119.21        52.71 o
   6   5 -12        343.93        391.51        57.24 o
   7   5 -12        441.93        519.39        70.51 o
   8   5 -12        905.94       1032.84        96.63 o
   9   5 -12        691.52        831.31        85.86 o
  10   5 -12       2113.89       2031.72       112.28 o
  11   5 -12        348.21        370.49        53.91 o
  12   5 -12       1000.82       1180.19        96.30 o
  13   5 -12        120.21        126.94        18.67 o
  14   5 -12        739.14        876.01        95.58 o
  15   5 -12        140.62         71.88        23.54 o
  16   5 -12        360.33        473.41        75.76 o
  17   5 -12        470.53        486.05        66.43 o
   0   6 -12        242.79        233.17        55.72 o
   1   6 -12        746.03        893.23        67.39 o
   2   6 -12       1324.44       1370.87        80.88 o
   3   6 -12        564.15        462.88        42.64 o
   4   6 -12       1075.00       1183.64       111.15 o
   5   6 -12       2041.40       2146.40       129.35 o
   6   6 -12        513.55        672.32        78.13 o
   7   6 -12         35.60         59.15        27.00 o
   8   6 -12        458.41        591.82        74.46 o
   9   6 -12       1435.43       1720.26       108.03 o
  10   6 -12        405.63        485.14        76.13 o
  11   6 -12        586.48        580.97        77.20 o
  12   6 -12         39.64         22.76        18.78 o
  13   6 -12         85.87         83.31        18.45 o
  14   6 -12        134.61         92.62        38.73 o
  15   6 -12        651.06        779.59       106.67 o
  16   6 -12        256.46        184.32        49.74 o
   0   7 -12       3226.65       3146.04       218.87 o
   1   7 -12       2933.72       2887.22       149.91 o
   2   7 -12        889.66        893.70       104.16 o
   3   7 -12        597.73        586.97       102.93 o
   4   7 -12          1.89         -9.19        30.16 o
   5   7 -12       1234.27       1406.84       139.37 o
   6   7 -12       1124.96       1163.38       140.09 o
   7   7 -12        112.69        268.74        72.15 o
   8   7 -12        154.53        107.58        40.24 o
   9   7 -12       1559.26       1697.39       116.42 o
  10   7 -12         36.87         80.03        32.03 o
  11   7 -12        255.49        289.74        57.47 o
  12   7 -12         43.33         45.65        22.37 o
  13   7 -12         93.11        158.62        37.49 o
  14   7 -12        780.82        924.54        87.03 o
  15   7 -12        475.24        465.34        58.49 o
  16   7 -12        421.89        268.81        49.95 o
   0   8 -12       2157.43       2296.83       192.84 o
   1   8 -12        398.20        490.15        76.62 o
   2   8 -12        781.61       1031.36       113.70 o
   3   8 -12        115.57        146.39        44.52 o
   4   8 -12       1128.71       1052.67       139.03 o
   5   8 -12         46.16         20.50        41.80 o
   6   8 -12       1268.13       1301.03       152.92 o
   7   8 -12        684.32        717.77       112.26 o
   8   8 -12        320.13        320.48        70.35 o
   9   8 -12         62.83         91.39        43.37 o
  10   8 -12       1630.96       1731.47       143.13 o
  11   8 -12         33.56         34.41        34.27 o
  12   8 -12       1057.92       1321.91       101.98 o
  13   8 -12        365.70        333.76        35.78 o
  14   8 -12        306.93        269.41        65.06 o
  15   8 -12         13.44        -28.55        28.55 o
   0   9 -12        649.51        651.42       128.14 o
   1   9 -12       2393.91       2166.14       132.66 o
   2   9 -12         45.67         20.12        37.39 o
   3   9 -12         21.04         39.22        23.23 o
   4   9 -12        333.31        393.52        93.99 o
   5   9 -12       1781.59       2110.16       163.92 o
   6   9 -12        281.52        251.64        56.24 o
   7   9 -12        268.99        194.92        62.22 o
   8   9 -12        111.05         42.95        31.85 o
   9   9 -12       1121.93       1229.63       129.29 o
  10   9 -12        562.75        649.77       105.61 o
  11   9 -12        748.67        710.08       109.79 o
  12   9 -12        129.54        135.40        37.36 o
  13   9 -12        115.20         88.17        19.37 o
  14   9 -12        253.45        164.54        57.45 o
   0  10 -12       2310.28       2595.14       209.24 o
   1  10 -12       1228.10       1433.25       129.55 o
   2  10 -12         49.75         13.97        36.68 o
   3  10 -12        158.21         99.36        39.24 o
   4  10 -12        243.44        330.46        82.00 o
   5  10 -12       1499.37       1765.49       148.69 o
   6  10 -12        217.78        169.26        49.20 o
   7  10 -12        195.80        217.85        46.76 o
   8  10 -12        177.19        220.73       117.33 o
   9  10 -12        376.26        340.01        62.75 o
  10  10 -12        510.31        372.85        84.63 o
  11  10 -12        221.76        220.47        35.54 o
  12  10 -12         59.35         77.02        31.96 o
  13  10 -12        329.29        315.84        69.70 o
   0  11 -12       2597.17       2606.29       214.92 o
   1  11 -12        135.61        236.69        52.10 o
   2  11 -12        241.55        203.60        46.56 o
   3  11 -12       1113.22       1266.21       130.72 o
   4  11 -12        941.50       1094.84       148.21 o
   5  11 -12         18.06         19.05        20.72 o
   6  11 -12        486.67        601.90        98.34 o
   7  11 -12        772.83        890.85       127.68 o
   8  11 -12        211.14        122.77        58.96 o
   9  11 -12        118.11         87.31        27.97 o
  10  11 -12        338.40        218.47        99.38 o
  11  11 -12         21.06         87.13        31.37 o
   0  12 -12        102.44        156.65        68.54 o
   1  12 -12        388.90        443.23        85.78 o
   2  12 -12          7.33        -21.05        21.05 o
   3  12 -12        264.70        277.76        54.34 o
   4  12 -12         38.69        -12.65        38.64 o
   5  12 -12        476.65        451.93        78.57 o
   6  12 -12        147.57        145.47        54.43 o
   7  12 -12          0.55        -19.15        19.15 o
   9  12 -12        142.89         94.18        31.74 o
   0  13 -12       1055.23       1018.83       241.64 o
   1  13 -12         78.18         33.66        38.65 o
   2  13 -12        411.65        253.48        54.14 o
   3  13 -12         57.19         18.04        20.61 o
   4  13 -12        271.30        190.31        57.17 o
   5  13 -12         58.25         35.35        41.78 o
   6  13 -12        228.73        180.51        24.34 o
   7  13 -12          5.13        -16.26        30.20 o
   0  14 -12        922.01        816.69       203.30 o
   1  14 -12        454.78        342.13        54.07 o
   2   0 -11       5897.44       5809.73       180.25 o
   4   0 -11       1569.56       1565.19        95.37 o
   6   0 -11       2156.18       1902.92       109.07 o
   8   0 -11       4493.65       4392.09       165.51 o
  10   0 -11        443.98        464.87        66.07 o
  12   0 -11       1611.59       1949.04       161.27 o
  14   0 -11       3257.57       3478.74       220.51 o
  16   0 -11       1215.72       1345.03       143.19 o
  18   0 -11       2538.35       2960.98       194.41 o
   1   1 -11       1163.03       1199.34        53.76 o
   2   1 -11       4508.78       4552.24       102.32 o
   3   1 -11       8838.14       8434.81       153.89 o
   4   1 -11         42.36         25.19        13.08 o
   5   1 -11        365.99        367.28        42.33 o
   6   1 -11        228.39        229.06        36.14 o
   7   1 -11       2144.97       2197.23        82.28 o
   8   1 -11       1062.71       1119.38        64.24 o
   9   1 -11        174.80        178.29        30.86 o
  10   1 -11        192.71        222.77        40.86 o
  11   1 -11        944.06        978.89        75.65 o
  12   1 -11        703.71        708.42        72.61 o
  13   1 -11       2837.74       2877.48       138.88 o
  14   1 -11        197.91        242.46        46.72 o
  15   1 -11        344.05        423.87        59.43 o
  16   1 -11        380.16        459.67        59.57 o
  17   1 -11        813.59        886.77       135.72 o
  18   1 -11        440.02        524.05        52.31 o
  19   1 -11        216.66        190.04        25.92 o
   1   2 -11       1329.71       1350.34        60.55 o
   2   2 -11       2892.71       2689.93        77.61 o
   3   2 -11       4493.48       4338.32       111.24 o
   4   2 -11       3421.28       3341.01       105.21 o
   5   2 -11        782.65        673.80        50.54 o
   6   2 -11       1993.83       1936.25        76.63 o
   7   2 -11        921.00        918.78        59.43 o
   8   2 -11       2288.11       2451.81        87.14 o
   9   2 -11       3515.57       3529.63       130.06 o
  10   2 -11        265.98        309.22        49.21 o
  11   2 -11        978.23       1167.80        81.68 o
  12   2 -11       1081.26       1058.48        75.86 o
  13   2 -11        320.36        345.06        46.67 o
  14   2 -11        419.36        430.55        57.85 o
  15   2 -11        434.84        409.52        57.68 o
  16   2 -11       1267.13       1393.41        93.84 o
  17   2 -11        660.66        850.70        88.00 o
  18   2 -11        245.70        198.76       170.19 o
  19   2 -11        349.56        465.57        79.34 o
   1   3 -11        148.15        106.24        21.66 o
   2   3 -11       1521.98       1344.23        69.30 o
   3   3 -11        324.39        311.37        43.02 o
   4   3 -11       2817.07       2962.56       100.00 o
   5   3 -11       1324.80       1298.06        69.73 o
   6   3 -11       1929.57       1914.71        71.67 o
   7   3 -11       2121.92       2017.36        93.67 o
   8   3 -11       1611.06       1744.51        90.31 o
   9   3 -11       2114.08       2072.98        96.85 o
  10   3 -11        348.50        317.44        45.68 o
  11   3 -11         15.82         21.91        18.62 o
  12   3 -11       1760.13       1781.70        89.98 o
  13   3 -11        234.02        217.82        38.71 o
  14   3 -11         46.76        119.12        27.10 o
  15   3 -11        490.00        622.45        89.89 o
  16   3 -11        480.30        466.60        74.35 o
  17   3 -11        144.72        162.41        45.78 o
  18   3 -11        731.80        642.65        73.33 o
   1   4 -11        998.63        930.78        63.64 o
   2   4 -11         12.33         17.85        16.40 o
   3   4 -11       3916.58       3939.65       110.09 o
   4   4 -11       1389.87       1232.51        66.59 o
   5   4 -11        621.93        608.81        45.15 o
   6   4 -11        673.93        682.74        73.55 o
   7   4 -11       4030.07       4076.41       144.82 o
   8   4 -11        121.65        109.46        36.66 o
   9   4 -11       1546.42       1692.46       100.50 o
  10   4 -11       1043.30        948.32        84.37 o
  11   4 -11       1102.32       1207.96        83.98 o
  12   4 -11        145.62        148.42        29.07 o
  13   4 -11        956.10       1162.66        77.67 o
  14   4 -11        432.91        451.50        61.21 o
  15   4 -11         27.56         61.61        15.77 o
  16   4 -11         57.45         -8.33        20.01 o
  17   4 -11        470.54        544.76        81.13 o
  18   4 -11         44.78         68.83        66.22 o
   1   5 -11        138.79         98.03        19.88 o
   2   5 -11       4691.01       4607.21       122.06 o
   3   5 -11        215.35        190.05        31.99 o
   4   5 -11        686.98        665.28        50.75 o
   5   5 -11        269.85        293.01        57.00 o
   6   5 -11       4598.96       4342.38       163.95 o
   7   5 -11        318.79        372.44        61.58 o
   8   5 -11       1054.55       1086.76        92.93 o
   9   5 -11        762.07        821.43        85.53 o
  10   5 -11         30.19         78.71        25.87 o
  11   5 -11        385.54        442.82        61.14 o
  12   5 -11        643.07        825.82        95.79 o
  13   5 -11         34.21         38.46        26.53 o
  14   5 -11        302.47        346.01        49.88 o
  15   5 -11        244.64        223.13        67.89 o
  16   5 -11        201.48        177.68        45.79 o
  17   5 -11        138.91        217.61        25.47 o
  18   5 -11        552.24        510.73       110.42 o
   1   6 -11       1295.55       1197.22        73.03 o
   2   6 -11       1221.67       1238.73        70.99 o
   3   6 -11        863.43        872.63        57.90 o
   4   6 -11        673.54        516.90        62.89 o
   5   6 -11        295.21        271.88        51.37 o
   6   6 -11        665.79        714.34        90.80 o
   7   6 -11       4615.01       4502.12       183.16 o
   8   6 -11       2564.04       2941.80       132.90 o
   9   6 -11        662.83        849.55        99.65 o
  10   6 -11         66.75        109.32        27.47 o
  11   6 -11        220.33        234.31        53.38 o
  12   6 -11        288.93        352.92        58.52 o
  13   6 -11        543.20        519.56        69.58 o
  14   6 -11        635.80        596.31        96.65 o
  15   6 -11        128.18        245.94        55.12 o
  16   6 -11         89.61        114.75        48.72 o
  17   6 -11        189.75        167.25        44.63 o
   1   7 -11       1136.16       1325.11       124.23 o
   2   7 -11         51.00         48.38        36.25 o
   3   7 -11       1427.92       1584.10       118.36 o
   4   7 -11        705.92        675.53       109.21 o
   5   7 -11         12.34         -7.36        20.33 o
   6   7 -11        789.84        756.95        90.38 o
   7   7 -11       1467.83       1652.77       115.95 o
   8   7 -11       1251.96       1406.93       118.81 o
   9   7 -11       1566.03       1516.62       116.03 o
  10   7 -11         63.53         12.91        22.10 o
  11   7 -11        779.43        947.43       109.92 o
  12   7 -11        413.17        431.05        68.14 o
  13   7 -11       1346.92       1441.70       111.80 o
  14   7 -11        111.37         -8.35        69.88 o
  15   7 -11         20.82         28.99        34.27 o
  16   7 -11          7.73         75.83        55.11 o
   1   8 -11        722.08        683.77        91.74 o
   2   8 -11       2035.80       2254.45       133.80 o
   3   8 -11        357.43        312.71        61.39 o
   4   8 -11       1028.88       1182.13       143.31 o
   5   8 -11        332.68        196.71        61.39 o
   6   8 -11        717.62        761.22       114.96 o
   7   8 -11         65.91        109.33        47.27 o
   8   8 -11       2958.92       3024.07       160.72 o
   9   8 -11         35.51         60.22        43.76 o
  10   8 -11         29.50         74.44        21.46 o
  11   8 -11        169.93        127.41        27.11 o
  12   8 -11       1027.50       1119.59        92.12 o
  13   8 -11         48.14         71.60        28.80 o
  14   8 -11        289.16        216.61        30.58 o
  15   8 -11         99.82         39.37        40.83 o
  16   8 -11        158.16        172.19        39.58 o
   1   9 -11        125.17         87.78        36.48 o
   2   9 -11        180.22        142.25        40.88 o
   3   9 -11       1509.09       1511.49       132.97 o
   4   9 -11        797.21        801.60       121.73 o
   5   9 -11        190.22        172.28        60.46 o
   6   9 -11        357.84        462.44        92.22 o
   7   9 -11       1511.30       1806.75       159.93 o
   8   9 -11       1331.56       1334.40       131.30 o
   9   9 -11        650.59        781.08       117.48 o
  10   9 -11        141.35         16.40        63.77 o
  11   9 -11        238.68        230.73        49.10 o
  12   9 -11         60.67         67.93        33.03 o
  13   9 -11       1297.77       1136.56        96.63 o
  14   9 -11        207.84        227.81        42.47 o
  15   9 -11         88.08         86.71        37.17 o
   1  10 -11        146.23         65.42        28.08 o
   2  10 -11       1422.14       1592.67       125.87 o
   3  10 -11        313.14        309.86        68.93 o
   4  10 -11        959.60       1262.73       152.83 o
   5  10 -11         64.13        -10.94        24.21 o
   6  10 -11        285.38        430.48        86.97 o
   7  10 -11       1232.19       1366.61       162.39 o
   8  10 -11        139.92        146.39        34.79 o
   9  10 -11         80.52         97.94        34.31 o
  10  10 -11         14.81         12.75        20.91 o
  11  10 -11        641.80        497.13        78.40 o
  12  10 -11        275.63        133.87        39.83 o
  13  10 -11        225.10         57.31        54.60 o
  14  10 -11        139.64        221.89        58.09 o
   1  11 -11        246.84        220.77        49.01 o
   2  11 -11       2215.56       2298.00       162.55 o
   3  11 -11        442.29        417.53        81.51 o
   4  11 -11        965.97       1128.33       146.03 o
   5  11 -11         22.60         32.24        18.46 o
   6  11 -11        518.58        413.41        77.81 o
   7  11 -11         49.75         72.41        31.17 o
   8  11 -11       1074.68       1253.84       126.17 o
   9  11 -11        232.25        372.19        96.20 o
  10  11 -11         70.95         46.81        21.00 o
  11  11 -11        159.05         55.02        33.70 o
  12  11 -11        341.16        551.82       183.55 o
   1  12 -11       1003.47       1051.44       142.41 o
   2  12 -11         62.07         89.10        31.37 o
   3  12 -11       1369.04       1557.36       157.63 o
   4  12 -11        274.40        231.68        69.98 o
   5  12 -11         44.96        -26.25        32.69 o
   6  12 -11         55.80         58.01        33.42 o
   7  12 -11        433.24        440.59        97.68 o
   8  12 -11         45.35         23.06        19.74 o
   9  12 -11        429.13        375.60        73.85 o
  10  12 -11         28.66        153.20        89.45 o
   1  13 -11         23.57         76.61        41.33 o
   2  13 -11       1237.07       1089.69       128.42 o
   3  13 -11        151.35        126.67        28.86 o
   4  13 -11         89.19         43.78        30.75 o
   5  13 -11         78.01         61.57        48.79 o
   6  13 -11         53.35        -19.03        22.87 o
   7  13 -11         17.84        -14.11        24.33 o
   8  13 -11        122.80         75.02       101.07 o
   1  14 -11        857.30        829.53       242.22 o
   2  14 -11        596.37        567.79       100.56 o
   3  14 -11        389.13        271.01       223.05 o
   4  14 -11        182.38         70.70        63.56 o
   0   0 -10      18845.79      18828.74       384.05 o
   2   0 -10       5879.65       5675.18       144.06 o
   4   0 -10       1603.81       1606.62       109.66 o
   6   0 -10        947.74        785.21        74.24 o
   8   0 -10        790.65        766.59        75.36 o
  10   0 -10        385.58        583.20        65.17 o
  12   0 -10       1940.46       1974.53       159.27 o
  14   0 -10        871.94       1050.85       144.63 o
  16   0 -10       1583.65       1981.96       159.16 o
  18   0 -10        605.30        753.80       118.35 o
   0   1 -10       1363.84       1398.21        73.55 o
   1   1 -10       6020.87       5814.25       111.27 o
   2   1 -10       1029.67        974.95        47.55 o
   3   1 -10        454.03        531.94        47.31 o
   4   1 -10        713.00        641.21        52.92 o
   5   1 -10       1636.85       1572.50        66.46 o
   6   1 -10       1117.97       1098.93        58.26 o
   7   1 -10        964.69       1004.68        59.49 o
   8   1 -10       1218.42       1167.71        63.03 o
   9   1 -10       2569.77       2635.60        89.12 o
  10   1 -10        100.25         88.35        21.09 o
  11   1 -10        539.04        677.20        62.23 o
  12   1 -10        549.42        509.59        60.61 o
  13   1 -10         36.45         58.47        22.09 o
  14   1 -10       1036.83       1278.04        94.40 o
  15   1 -10       2127.35       2081.47       115.94 o
  16   1 -10        130.75        124.80        57.15 o
  17   1 -10        218.98        281.25        48.37 o
  18   1 -10        162.61        226.72        31.85 o
  19   1 -10       1299.06       1301.30       102.09 o
   0   2 -10      10763.68      10373.82       225.57 o
   1   2 -10       1669.51       1621.58        63.73 o
   2   2 -10         55.12         31.45        11.31 o
   3   2 -10       2280.86       2289.22        78.38 o
   4   2 -10       3917.14       3962.79       109.89 o
   5   2 -10       3224.70       3129.09        91.08 o
   6   2 -10       1573.27       1531.54        65.36 o
   7   2 -10        392.14        380.73        37.27 o
   8   2 -10       1269.72       1365.89        60.71 o
   9   2 -10       3985.06       3950.75       124.18 o
  10   2 -10       3342.99       3146.72       115.12 o
  11   2 -10        639.40        754.02        71.84 o
  12   2 -10         12.13         51.69        24.01 o
  13   2 -10       1571.43       1591.80        86.97 o
  14   2 -10        124.92        176.26        38.05 o
  15   2 -10       1864.35       1986.33       113.00 o
  16   2 -10       1116.97       1050.99        84.62 o
  17   2 -10        140.94        206.85        43.01 o
  18   2 -10          9.55         18.10        21.47 o
  19   2 -10         10.27          1.11        25.31 o
   0   3 -10       1730.89       1643.29        91.29 o
   1   3 -10       2150.96       2224.67        74.33 o
   2   3 -10       5527.10       5490.22       116.00 o
   3   3 -10       2841.61       2723.43        86.35 o
   4   3 -10       6617.43       6093.78       128.71 o
   5   3 -10       3568.37       3392.61        91.37 o
   6   3 -10       2151.82       2146.78        73.83 o
   7   3 -10        698.54        697.26        44.94 o
   8   3 -10       1192.49       1231.67        79.30 o
   9   3 -10          8.90         11.33        25.29 o
  10   3 -10       2957.04       2956.15       115.26 o
  11   3 -10        692.37        646.74        66.36 o
  12   3 -10        391.16        327.92        44.20 o
  13   3 -10        445.03        441.31        53.15 o
  14   3 -10       2874.42       3153.19       120.97 o
  15   3 -10         85.32         95.70        26.16 o
  16   3 -10         58.60        111.43        32.50 o
  17   3 -10        133.59         90.76        42.13 o
  18   3 -10         25.35         43.50        35.29 o
  19   3 -10        141.39        160.22        32.29 o
   0   4 -10        109.62         61.46        23.98 o
   1   4 -10       2125.99       1939.61        68.05 o
   2   4 -10       2997.39       2966.88        83.22 o
   3   4 -10        377.03        438.51        41.38 o
   4   4 -10        307.98        280.14        37.39 o
   5   4 -10       6574.37       6446.36       142.04 o
   6   4 -10        698.60        746.62        49.10 o
   7   4 -10        369.62        400.21        58.99 o
   8   4 -10         96.07         75.15        36.48 o
   9   4 -10       1709.20       1788.36        94.58 o
  10   4 -10        379.27        438.58        58.31 o
  11   4 -10       4120.65       4251.15       139.97 o
  12   4 -10        742.44        801.79        75.99 o
  13   4 -10        114.55         67.47        18.76 o
  14   4 -10        215.79        167.38        37.18 o
  15   4 -10        341.65        372.57        62.49 o
  16   4 -10        416.76        533.82        72.41 o
  17   4 -10        351.42        467.92        48.12 o
  18   4 -10        134.74        183.07        50.27 o
  19   4 -10        516.25        686.57       152.18 o
   0   5 -10       6410.57       6743.70       175.54 o
   1   5 -10        348.05        277.43        29.32 o
   2   5 -10       1468.05       1438.25        65.70 o
   3   5 -10        647.57        687.85        52.27 o
   4   5 -10       4900.06       4764.18       118.06 o
   5   5 -10       1368.98       1411.01        74.34 o
   6   5 -10       4787.35       4907.35       155.31 o
   7   5 -10       1107.01       1142.79        91.71 o
   8   5 -10         87.86         32.37        28.73 o
   9   5 -10       1656.77       1876.26       105.78 o
  10   5 -10       3934.82       4049.27       150.58 o
  11   5 -10        110.27        129.61        36.00 o
  12   5 -10       1332.85       1115.99       115.64 o
  13   5 -10         69.86        127.04        24.19 o
  14   5 -10        901.58       1230.44        88.37 o
  15   5 -10        287.79        336.70        61.72 o
  16   5 -10        112.42        143.06        33.54 o
  17   5 -10         72.36        160.33        35.37 o
  18   5 -10        365.72        286.34       156.25 o
   0   6 -10       6898.51       6758.92       211.76 o
   1   6 -10       2489.77       2477.49        85.82 o
   2   6 -10         67.83         66.84        19.48 o
   3   6 -10       2503.60       2489.55       100.02 o
   4   6 -10       1707.88       1875.39        98.46 o
   5   6 -10       3589.30       3766.36       139.35 o
   6   6 -10       1770.04       1723.30       103.19 o
   7   6 -10       2154.95       2317.76       131.58 o
   8   6 -10        384.34        445.42        71.73 o
   9   6 -10        546.88        546.79        80.18 o
  10   6 -10       3368.19       3411.57       158.39 o
  11   6 -10        353.45        441.93        66.92 o
  12   6 -10        407.43        360.15        57.08 o
  13   6 -10        321.45        358.99        81.15 o
  14   6 -10        317.83        375.47        74.95 o
  15   6 -10        149.11        133.80        34.65 o
  16   6 -10       1090.75       1102.97        92.73 o
  17   6 -10        595.68        712.77       166.63 o
  18   6 -10        100.17        143.64        45.28 o
   0   7 -10       3874.97       3626.74       227.72 o
   1   7 -10       1045.18       1299.72       121.35 o
   2   7 -10        873.92        842.27       100.00 o
   3   7 -10       5091.75       5034.81       173.67 o
   4   7 -10       1223.90       1132.87        86.06 o
   5   7 -10       1565.07       1780.06       120.68 o
   6   7 -10        785.03        754.59       111.56 o
   7   7 -10       1319.48       1400.03       109.07 o
   8   7 -10        489.24        464.63        73.62 o
   9   7 -10       3198.83       3277.85       159.95 o
  10   7 -10       1397.70       1617.73       119.67 o
  11   7 -10       1431.17       1786.35       117.05 o
  12   7 -10        231.07        289.72        52.80 o
  13   7 -10        461.52        536.31        71.56 o
  14   7 -10        809.63        845.21        74.48 o
  15   7 -10        212.28        279.41        82.65 o
  16   7 -10         76.31         18.01        43.13 o
  17   7 -10        335.38        315.46        54.91 o
   0   8 -10       4239.57       4212.38       252.39 o
   1   8 -10        301.85        203.77        54.40 o
   2   8 -10        176.63        116.18        43.17 o
   3   8 -10        274.92        291.66        62.01 o
   4   8 -10        617.64        818.50        97.86 o
   5   8 -10        846.79        695.76       108.30 o
   6   8 -10       3386.00       3435.28       193.66 o
   7   8 -10        511.68        543.09        80.68 o
   8   8 -10        533.49        601.64        84.82 o
   9   8 -10         50.58         77.42        22.16 o
  10   8 -10       4558.69       4729.31       196.67 o
  11   8 -10        147.49         87.97        19.72 o
  12   8 -10        135.96        142.93        29.31 o
  13   8 -10        128.07         73.76        16.91 o
  14   8 -10        580.53        949.70       135.92 o
  15   8 -10        269.53        187.22        35.43 o
  16   8 -10        205.01        191.43        67.14 o
   0   9 -10        213.12        276.83        89.61 o
   1   9 -10       2817.90       3092.48       157.47 o
   2   9 -10        518.58        519.72        82.45 o
   3   9 -10       1134.28       1173.10       121.55 o
   4   9 -10       1516.01       1572.06       135.59 o
   5   9 -10       1372.37       1488.07       143.84 o
   6   9 -10        313.91        252.84        67.74 o
   7   9 -10       1048.93       1188.02       126.89 o
   8   9 -10        129.67         62.49        27.24 o
   9   9 -10       2442.10       2539.17       141.45 o
  10   9 -10        418.30        415.48        74.95 o
  11   9 -10        715.15        598.19        78.31 o
  12   9 -10        171.73        207.93        33.54 o
  13   9 -10        188.86        220.29        47.82 o
  14   9 -10        122.05        145.21       104.55 o
  15   9 -10        508.87        407.73        51.43 o
   0  10 -10       2325.58       2112.00       190.38 o
   1  10 -10        239.70        161.62        43.36 o
   2  10 -10        431.89        467.91        75.90 o
   3  10 -10        268.71        306.04        74.39 o
   4  10 -10        866.89        899.76       127.19 o
   5  10 -10       1190.93       1316.22       136.99 o
   6  10 -10        795.09        880.42       126.89 o
   7  10 -10         50.39         45.92        23.38 o
   8  10 -10         70.49         74.85        54.10 o
   9  10 -10        646.74        746.34       107.66 o
  10  10 -10       1023.62       1018.00       109.53 o
  11  10 -10        764.93        846.11       118.50 o
  12  10 -10        130.72        -20.63        28.95 o
  13  10 -10         32.72          1.02        48.21 o
  14  10 -10        156.40        114.42        28.02 o
   0  11 -10         18.96         56.92        54.60 o
   1  11 -10        223.38        211.72        60.36 o
   2  11 -10        136.61        156.14        65.48 o
   3  11 -10         49.77         48.24        38.46 o
   4  11 -10       2095.77       2265.05       162.49 o
   5  11 -10       1224.28       1358.80       165.07 o
   6  11 -10        965.84        971.16       136.27 o
   7  11 -10         18.28        -23.44        27.16 o
   8  11 -10        164.35        317.15       151.02 o
   9  11 -10         54.62        123.13        42.17 o
  10  11 -10        731.53        883.77       117.40 o
  11  11 -10        137.04         88.21        63.31 o
  12  11 -10         18.85        -56.92        56.92 o
  13  11 -10        392.78        366.76       105.72 o
   0  12 -10        332.12        591.31       162.64 o
   1  12 -10       2451.47       2471.85       153.86 o
   2  12 -10        213.66        122.47        35.37 o
   3  12 -10        359.70        323.36        64.90 o
   4  12 -10        189.76        210.59        70.46 o
   5  12 -10       1613.48       1666.81       154.42 o
   6  12 -10         25.00        -19.47        19.47 o
   7  12 -10         81.82         10.90        19.37 o
   8  12 -10         28.78        103.41        27.11 o
   9  12 -10         81.73        185.03        57.03 o
  10  12 -10         76.98         28.04        73.77 o
  11  12 -10         70.50        167.29        65.06 o
   0  13 -10       1451.73       1721.69       251.51 o
   1  13 -10        228.20        331.97        84.68 o
   2  13 -10        334.47        259.72        48.93 o
   3  13 -10        103.28          0.80        15.91 o
   4  13 -10        531.32        417.34        84.00 o
   5  13 -10         75.75         37.27        31.24 o
   6  13 -10        348.24        310.39        65.94 o
   7  13 -10        123.08         45.70        23.41 o
   8  13 -10        199.85        152.18        82.48 o
   9  13 -10         91.31        108.31        31.66 o
   0  14 -10        331.55        302.05        87.13 o
   1  14 -10        331.29        212.69        39.17 o
   2  14 -10        446.03        599.62        82.69 o
   3  14 -10        106.95         61.06        25.13 o
   4  14 -10         28.41        -23.13        23.13 o
   5  14 -10        170.72        118.50        54.60 o
   6  14 -10        115.58        228.25        31.61 o
   2   0  -9      20789.79      21396.14       276.65 o
   4   0  -9       3997.83       3692.43       131.43 o
   6   0  -9       8340.69       7791.09       196.83 o
   8   0  -9        854.72        871.45        76.52 o
  10   0  -9       2485.21       2510.82       121.88 o
  12   0  -9       1326.53       1142.20       147.52 o
  14   0  -9       2131.26       1989.13       158.60 o
  16   0  -9       1224.73       1359.25       122.51 o
  18   0  -9        369.43        376.40       117.33 o
  20   0  -9          5.11        142.89        51.12 o
   1   1  -9       3600.89       3503.19        82.30 o
   2   1  -9        695.39        676.30        39.45 o
   3   1  -9       5247.69       4949.04       114.77 o
   4   1  -9       2256.44       2268.36        73.94 o
   5   1  -9       2759.02       2665.66        79.88 o
   6   1  -9        348.94        349.25        38.23 o
   7   1  -9       1734.96       1653.77        65.50 o
   8   1  -9        578.30        513.55        43.13 o
   9   1  -9       1297.01       1338.91        63.30 o
  10   1  -9       1144.41       1092.63        60.50 o
  11   1  -9       1982.51       2111.75        95.93 o
  12   1  -9        709.43        658.27        68.75 o
  13   1  -9       1550.20       1670.35        88.78 o
  14   1  -9       1170.12       1078.76       101.09 o
  15   1  -9         67.86        118.35        25.19 o
  16   1  -9        631.18        794.45        89.19 o
  17   1  -9        437.09        446.99       105.76 o
  18   1  -9        222.73        161.65        34.90 o
  19   1  -9        360.24        312.49        80.12 o
  20   1  -9         28.36        139.41        34.85 o
   1   2  -9       2126.48       1930.38        65.43 o
   2   2  -9        683.34        618.11        39.57 o
   3   2  -9      10756.92      10913.81       172.42 o
   4   2  -9        247.05        170.64        23.28 o
   5   2  -9       1656.91       1644.24        61.92 o
   6   2  -9       2163.01       2174.84        70.62 o
   7   2  -9       2636.20       2606.65        78.58 o
   8   2  -9        468.99        517.71        40.01 o
   9   2  -9        111.50         95.18        21.30 o
  10   2  -9        316.19        391.73        51.98 o
  11   2  -9         13.77         27.74        24.20 o
  12   2  -9        896.67        979.44        75.55 o
  13   2  -9       1900.55       1830.11        87.41 o
  14   2  -9        558.82        732.70        69.23 o
  15   2  -9        106.73         83.98        24.70 o
  16   2  -9        231.85        324.56        57.14 o
  17   2  -9        436.11        665.53        88.22 o
  18   2  -9        177.76        235.91        43.83 o
  19   2  -9        230.75        348.91        47.19 o
  20   2  -9         10.67         16.71        91.78 o
   1   3  -9       1133.70       1141.62        50.04 o
   2   3  -9        994.27        842.24        44.41 o
   3   3  -9       4062.65       3962.78        98.66 o
   4   3  -9         73.92         83.67        22.99 o
   5   3  -9        632.77        635.32        42.65 o
   6   3  -9       8868.18       8997.44       142.09 o
   7   3  -9       2959.47       3057.02        81.86 o
   8   3  -9       8625.68       8650.37       180.09 o
   9   3  -9         63.34        100.90        31.77 o
  10   3  -9        158.35        169.50        38.80 o
  11   3  -9         12.31          0.72        29.59 o
  12   3  -9       1122.08       1212.57        78.13 o
  13   3  -9        525.17        478.76        56.37 o
  14   3  -9        267.45        275.51        44.09 o
  15   3  -9          3.33          3.00        16.22 o
  16   3  -9        327.67        541.61        72.30 o
  17   3  -9         52.35         78.35        19.82 o
  18   3  -9        635.41        500.29        39.77 o
  19   3  -9        193.86         58.09        69.70 o
   1   4  -9       1926.76       1961.50        63.19 o
   2   4  -9        112.04        153.68        15.64 o
   3   4  -9       3525.52       3617.40        96.68 o
   4   4  -9        454.55        499.34        39.48 o
   5   4  -9        682.18        715.33        46.30 o
   6   4  -9        585.98        495.21        36.45 o
   7   4  -9       4403.42       4306.53       141.40 o
   8   4  -9        219.13        234.77        48.77 o
   9   4  -9       3063.16       3024.38       114.18 o
  10   4  -9        474.39        387.95        55.72 o
  11   4  -9       2151.24       2106.98        97.06 o
  12   4  -9        478.76        475.03        65.02 o
  13   4  -9       1638.14       1810.56       102.45 o
  14   4  -9         34.74         62.00        25.32 o
  15   4  -9        275.95        193.40        36.64 o
  16   4  -9        141.03        151.66        39.44 o
  17   4  -9       1403.77       1425.56        98.72 o
  18   4  -9        130.55        152.95        51.41 o
  19   4  -9        102.96        166.04        44.31 o
   1   5  -9       1515.26       1485.96        57.04 o
   2   5  -9       1920.92       1837.73        62.44 o
   3   5  -9        477.37        457.49        38.88 o
   4   5  -9       1280.13       1274.97        58.97 o
   5   5  -9        383.76        386.89        34.82 o
   6   5  -9        586.52        591.29        68.04 o
   7   5  -9        270.23        267.79        49.92 o
   8   5  -9       4879.01       4921.19       158.74 o
   9   5  -9       1923.64       2025.05       106.68 o
  10   5  -9        659.04        763.18        90.72 o
  11   5  -9       2124.85       2056.47       118.34 o
  12   5  -9       2570.33       2690.70       135.86 o
  13   5  -9         33.17         -6.42        24.98 o
  14   5  -9        247.98        193.19        42.99 o
  15   5  -9         40.90        104.76        27.70 o
  16   5  -9        140.07        161.57        30.96 o
  17   5  -9        229.63        269.18        60.80 o
  18   5  -9        523.64        814.94       133.02 o
  19   5  -9         73.14          7.31        45.31 o
   1   6  -9       1380.16       1323.33        85.59 o
   2   6  -9       4317.53       4282.01       124.56 o
   3   6  -9       2358.90       2276.22       105.20 o
   4   6  -9       1380.67       1429.82        85.13 o
   5   6  -9       1002.59       1080.33       124.13 o
   6   6  -9        879.63       1005.07       103.98 o
   7   6  -9       2627.51       2722.41       139.92 o
   8   6  -9       2100.69       2010.12       128.38 o
   9   6  -9       2511.03       2515.32       134.29 o
  10   6  -9        190.73        207.73        45.94 o
  11   6  -9        656.36        760.56        90.70 o
  12   6  -9        561.42        673.26        85.16 o
  13   6  -9       1253.83       1371.69       105.86 o
  14   6  -9         75.96        116.25        33.03 o
  15   6  -9         32.10         58.69        23.64 o
  16   6  -9        891.23        858.92       116.82 o
  17   6  -9        169.89        155.36        53.44 o
  18   6  -9         13.14         39.92        99.91 o
   1   7  -9       2175.80       2141.27       124.19 o
   2   7  -9       1996.79       2095.81       104.71 o
   3   7  -9       6210.50       6103.69       176.66 o
   4   7  -9        757.48        773.52        81.70 o
   5   7  -9         83.32         75.98        26.05 o
   6   7  -9        139.43        186.13        50.98 o
   7   7  -9       3616.09       3689.92       168.53 o
   8   7  -9        103.37        120.25        39.76 o
   9   7  -9        720.10        831.72       100.40 o
  10   7  -9         88.59         52.87        21.77 o
  11   7  -9        464.37        447.33        72.54 o
  12   7  -9        358.72        368.90        58.13 o
  13   7  -9       2208.34       2242.76       126.27 o
  14   7  -9         12.28         71.25        55.76 o
  15   7  -9        103.41        155.25        43.58 o
  16   7  -9        332.82        277.01        48.93 o
  17   7  -9        342.62        211.08       118.50 o
  18   7  -9        340.32        146.38        41.82 o
   1   8  -9         77.45         82.34        40.70 o
   2   8  -9       2779.79       2905.02       148.18 o
   3   8  -9        269.39        269.01        57.52 o
   4   8  -9       1629.14       1569.56        97.31 o
   5   8  -9        469.93        545.60        83.49 o
   6   8  -9       3992.47       3748.92       198.41 o
   7   8  -9         52.67         21.01        25.63 o
   8   8  -9       1054.27       1356.21       108.63 o
   9   8  -9         52.96         58.83        20.12 o
  10   8  -9        209.27        250.50        44.41 o
  11   8  -9         95.84        114.15        27.18 o
  12   8  -9        578.35       1016.19        95.74 o
  13   8  -9        127.05        149.71        27.21 o
  14   8  -9       1156.49       1250.39       141.12 o
  15   8  -9         94.36        175.01        93.52 o
  16   8  -9        894.71        999.54       109.17 o
  17   8  -9         30.68         37.95        27.64 o
   1   9  -9       1553.04       1585.63       118.79 o
   2   9  -9        628.15        637.29        90.53 o
   3   9  -9       1492.74       1691.61       125.97 o
   4   9  -9        212.48        194.42        68.37 o
   5   9  -9        390.71        314.24        76.33 o
   6   9  -9        161.43        191.91        62.00 o
   7   9  -9       2876.74       2822.27       148.58 o
   8   9  -9        281.20        358.81        60.36 o
   9   9  -9         45.80         63.17        34.71 o
  10   9  -9        241.51        219.10        61.04 o
  11   9  -9        691.36        736.48       112.85 o
  12   9  -9         71.16        116.69        44.60 o
  13   9  -9        787.43        933.81       134.33 o
  14   9  -9         70.81        116.12        44.62 o
  15   9  -9        403.71        340.92        77.25 o
  16   9  -9         47.33         88.50        62.75 o
   1  10  -9        588.11        756.21        99.90 o
   2  10  -9       2617.42       2756.57       150.98 o
   3  10  -9        327.09        402.55        68.30 o
   4  10  -9        890.50        918.19       127.56 o
   5  10  -9        112.64        160.19        40.77 o
   6  10  -9       1677.84       2050.86       155.84 o
   7  10  -9        251.82        223.57        87.50 o
   8  10  -9        396.90        403.12        82.78 o
   9  10  -9        539.06        543.66        94.51 o
  10  10  -9        145.52        130.54        25.06 o
  11  10  -9        454.82        481.95        51.21 o
  12  10  -9        822.05        742.68       114.10 o
  13  10  -9         56.37         -7.50        29.31 o
  14  10  -9         26.69         29.57        23.19 o
  15  10  -9         28.96         27.68        51.43 o
   1  11  -9         40.92        -21.53        24.47 o
   2  11  -9       2750.21       2649.45       152.16 o
   3  11  -9       1507.30       1493.87       148.01 o
   4  11  -9        255.55        258.37        65.69 o
   5  11  -9        185.07        235.75        55.82 o
   6  11  -9         36.73         15.57        21.45 o
   7  11  -9        746.92        909.26       129.03 o
   8  11  -9        831.60        872.69       126.74 o
   9  11  -9        149.22         83.17        64.48 o
  10  11  -9         42.02         46.39        26.72 o
  11  11  -9        162.57         90.80        51.89 o
  12  11  -9        283.29        179.38        42.04 o
  13  11  -9        258.05         36.99        95.26 o
   1  12  -9       1539.69       1595.47       136.81 o
   2  12  -9          0.98         27.18        20.29 o
   3  12  -9        549.70        580.15       100.11 o
   4  12  -9          0.14        -15.52        15.52 o
   5  12  -9        297.12        250.90        50.36 o
   6  12  -9         17.92         54.98        25.68 o
   7  12  -9        958.85        955.35       126.23 o
   8  12  -9         76.77         56.15        24.44 o
   9  12  -9        779.12        688.45       151.74 o
  10  12  -9         75.12         31.77        32.54 o
  11  12  -9        189.69        158.41        47.24 o
  12  12  -9        193.37         97.58        39.91 o
   1  13  -9        154.28         96.64        23.33 o
   2  13  -9        941.30        825.25       125.87 o
   3  13  -9        214.56        119.92        43.60 o
   4  13  -9        239.40        135.45        34.40 o
   5  13  -9        190.28         15.10        25.11 o
   6  13  -9          8.18         87.85        64.48 o
   7  13  -9         48.06         97.58        55.76 o
   8  13  -9        414.30        242.80       112.69 o
   9  13  -9         10.86          8.75       102.81 o
  10  13  -9         37.37         15.15        40.66 o
   1  14  -9        255.68        260.55        35.49 o
   2  14  -9        253.07        178.57        42.25 o
   3  14  -9         78.36         74.14        24.26 o
   4  14  -9        199.12        200.13        33.63 o
   5  14  -9         17.24        -26.74        36.69 o
   6  14  -9         46.98         33.69        54.60 o
   7  14  -9        356.76        169.38        59.93 o
   1  15  -9        140.53        170.05        29.21 o
   2  15  -9          1.71        -22.07        27.88 o
   0   0  -8      26128.41      24687.38       896.27 o
   2   0  -8        766.71        821.03        50.75 o
   4   0  -8       9724.54       9806.62       204.78 o
   6   0  -8       8060.98       7943.15       190.11 o
   8   0  -8       2388.99       2491.19       112.42 o
  10   0  -8      14412.63      13743.31       281.10 o
  12   0  -8        956.45        819.66        74.46 o
  14   0  -8       3566.81       3746.13       211.09 o
  16   0  -8        973.89       1205.56       126.05 o
  18   0  -8        148.21        220.73        77.84 o
  20   0  -8        978.41       1158.23       156.83 o
   0   1  -8       3836.15       3733.15       105.18 o
   1   1  -8       4190.03       4150.34        84.01 o
   2   1  -8       1084.30       1111.32        45.11 o
   3   1  -8       3272.18       3169.97        94.86 o
   4   1  -8        170.50        121.59        24.90 o
   5   1  -8       5341.77       5138.13       106.00 o
   6   1  -8       4922.95       4862.05       104.53 o
   7   1  -8        571.44        483.27        38.39 o
   8   1  -8         61.01         73.24        20.97 o
   9   1  -8       3733.69       3565.72        92.62 o
  10   1  -8       1787.27       1800.36        68.23 o
  11   1  -8        642.18        786.18        52.43 o
  12   1  -8       3128.81       2968.80       112.35 o
  13   1  -8        127.26        159.31        35.30 o
  14   1  -8       1923.32       2139.17       114.65 o
  15   1  -8       1808.33       2052.76       111.21 o
  16   1  -8        432.57        476.97        64.69 o
  17   1  -8       1038.35       1177.24        98.89 o
  18   1  -8          0.24        107.42        26.16 o
  19   1  -8        910.74       1108.81       133.02 o
  20   1  -8         65.30        170.11        65.06 o
   0   2  -8       2619.44       2270.07        93.43 o
   1   2  -8       6012.77       6328.33       110.84 o
   2   2  -8       5521.98       5633.80        95.13 o
   3   2  -8       1803.74       1740.64        59.06 o
   4   2  -8       2789.32       2606.82        71.52 o
   5   2  -8       4865.14       4883.32        99.09 o
   6   2  -8        560.31        519.58        37.94 o
   7   2  -8        963.99       1040.82        51.43 o
   8   2  -8        519.44        551.83        38.72 o
   9   2  -8        927.11        909.94        49.34 o
  10   2  -8        959.84       1103.78        73.51 o
  11   2  -8       7508.96       7168.66       165.30 o
  12   2  -8        589.97        566.87        62.56 o
  13   2  -8        760.60        916.66        70.32 o
  14   2  -8        508.70        636.33        62.64 o
  15   2  -8        644.22        741.96        85.48 o
  16   2  -8        177.66        349.73        56.69 o
  17   2  -8        960.53       1010.67        92.30 o
  18   2  -8         25.62        120.88        22.63 o
  19   2  -8        338.84        422.60        36.38 o
  20   2  -8        104.89         92.42        30.04 o
   0   3  -8       1757.07       1538.26        73.44 o
   1   3  -8       3013.98       2637.04        71.07 o
   2   3  -8       2198.16       2154.68        63.22 o
   3   3  -8       1174.91       1091.98        51.31 o
   4   3  -8       1598.44       1423.21        57.02 o
   5   3  -8       3387.24       3533.84        83.60 o
   6   3  -8       4067.68       3821.90        86.02 o
   7   3  -8       1872.09       1835.70        59.16 o
   8   3  -8        398.71        399.44        31.99 o
   9   3  -8       1492.32       1445.82        77.80 o
  10   3  -8       1726.32       1821.47        88.00 o
  11   3  -8          4.32          0.27        19.44 o
  12   3  -8       1202.05       1198.37        77.38 o
  13   3  -8        502.60        543.06        59.22 o
  14   3  -8       3907.05       4195.21       147.61 o
  15   3  -8        619.11        661.58        70.24 o
  16   3  -8        284.00        341.54        57.68 o
  17   3  -8         34.73         13.05        25.73 o
  18   3  -8        172.60        218.51        25.32 o
  19   3  -8        101.53        101.53        34.61 o
  20   3  -8        184.26        212.35        37.02 o
   0   4  -8       3019.99       2877.30       103.51 o
   1   4  -8       4747.01       4948.54        94.65 o
   2   4  -8       2221.37       2325.82        64.25 o
   3   4  -8       3213.76       2932.12        83.28 o
   4   4  -8       2865.61       2841.24        86.52 o
   5   4  -8       7949.98       7727.04       130.14 o
   6   4  -8        105.07         78.58        14.58 o
   7   4  -8         35.57         25.57        24.27 o
   8   4  -8       1262.00       1268.10        82.68 o
   9   4  -8        645.17        736.53        69.59 o
  10   4  -8       1133.22       1156.88        79.14 o
  11   4  -8       2590.33       2497.60       115.83 o
  12   4  -8        165.73        160.70        35.27 o
  13   4  -8        490.63        483.19        62.10 o
  14   4  -8        287.75        208.04        33.80 o
  15   4  -8       1194.91       1440.02        91.79 o
  16   4  -8        368.19        358.86        44.79 o
  17   4  -8        383.82        334.09        52.51 o
  18   4  -8        130.86        143.69        44.09 o
  19   4  -8        412.87        281.68       213.76 o
   0   5  -8       2001.86       1657.39        82.20 o
   1   5  -8        704.28        623.60        38.67 o
   2   5  -8       4210.12       4067.39        89.17 o
   3   5  -8        614.03        555.53        40.26 o
   4   5  -8       3202.78       3383.69       113.37 o
   5   5  -8         30.54          6.54        23.77 o
   6   5  -8       1807.39       1824.58        92.84 o
   7   5  -8        421.64        345.56        54.47 o
   8   5  -8       2377.66       2271.11       121.10 o
   9   5  -8       1046.75       1015.09       101.62 o
  10   5  -8       6207.43       6297.98       204.11 o
  11   5  -8         60.75         27.30        31.52 o
  12   5  -8       2669.08       2680.44       133.84 o
  13   5  -8        557.12        597.17        79.74 o
  14   5  -8        880.45       1058.17        93.01 o
  15   5  -8         74.06        124.57        28.00 o
  16   5  -8        510.28        455.74       100.61 o
  17   5  -8        399.44        715.04       179.49 o
  18   5  -8        723.02        930.71       170.77 o
  19   5  -8        110.02        146.75        85.97 o
   0   6  -8       8383.33       8406.10       243.87 o
   1   6  -8       4352.06       4291.26       122.09 o
   2   6  -8       4290.47       4384.93       121.98 o
   3   6  -8        226.76        282.72        45.98 o
   4   6  -8       1401.47       1365.04        79.33 o
   5   6  -8       6716.43       6424.30       165.19 o
   6   6  -8       3174.43       3025.14       139.37 o
   7   6  -8       2194.86       1933.87       116.36 o
   8   6  -8        700.76        679.78        86.54 o
   9   6  -8        554.47        741.57        90.28 o
  10   6  -8       1460.58       1539.80       110.72 o
  11   6  -8       1168.30       1240.09       104.25 o
  12   6  -8       1133.12       1266.27       105.98 o
  13   6  -8        365.62        358.36        66.24 o
  14   6  -8       1043.76       1168.99       100.31 o
  15   6  -8       1643.84       1687.03       113.11 o
  16   6  -8       1236.84       1182.11       106.68 o
  17   6  -8          4.15         15.31        29.35 o
  18   6  -8         37.72         77.42        34.63 o
  19   6  -8         98.41        138.24        44.15 o
   0   7  -8        901.61        916.80        88.85 o
   1   7  -8       9056.11       8664.74       206.05 o
   2   7  -8          7.32          9.71        18.48 o
   3   7  -8       2390.91       2405.06       109.73 o
   4   7  -8        116.78        183.97        40.05 o
   5   7  -8       2671.29       2821.13       130.58 o
   6   7  -8        800.67        826.40        94.93 o
   7   7  -8       1125.70       1250.55       107.39 o
   8   7  -8        194.86        303.45        57.85 o
   9   7  -8       4928.07       4961.53       190.38 o
  10   7  -8        943.70       1103.59       100.19 o
  11   7  -8        444.03        532.47        78.09 o
  12   7  -8         27.30        116.95        28.69 o
  13   7  -8         75.34        161.50        34.78 o
  14   7  -8        294.71        262.44        38.99 o
  15   7  -8       2004.12       2146.82       161.75 o
  16   7  -8         24.12         10.58        19.91 o
  17   7  -8         49.00         85.63        26.17 o
  18   7  -8         15.54        -35.92        35.92 o
   0   8  -8       4667.09       4569.91       254.67 o
   1   8  -8        534.74        576.40        82.53 o
   2   8  -8       1640.26       1718.67        99.33 o
   3   8  -8       2815.12       2780.02       122.52 o
   4   8  -8       3113.62       3260.44       134.38 o
   5   8  -8         38.38         37.87        17.94 o
   6   8  -8       2661.57       2674.19       143.11 o
   7   8  -8        326.55        315.91        62.30 o
   8   8  -8       1074.26       1017.45        89.75 o
   9   8  -8        742.52        769.12        97.94 o
  10   8  -8       2843.76       3204.22       155.12 o
  11   8  -8          7.62         28.98        28.51 o
  12   8  -8        937.57        936.45        88.32 o
  13   8  -8        177.33        266.43       111.35 o
  14   8  -8        393.59        451.69        90.86 o
  15   8  -8        141.76        143.30        29.94 o
  16   8  -8        626.02        683.08       140.75 o
  17   8  -8        206.36        257.17        50.55 o
   0   9  -8       2040.77       2145.82       185.41 o
   1   9  -8        837.72        778.48        98.45 o
   2   9  -8       1216.31       1369.91       120.66 o
   3   9  -8        233.62        221.80        55.21 o
   4   9  -8        359.64        488.32        77.95 o
   5   9  -8        228.50        370.24        64.76 o
   6   9  -8        647.34        624.36        84.54 o
   7   9  -8        391.93        427.05        70.73 o
   8   9  -8        122.35        112.72        34.28 o
   9   9  -8       3105.10       3279.87       161.92 o
  10   9  -8        339.91        437.78        69.59 o
  11   9  -8        799.13        929.38        85.71 o
  12   9  -8        606.65        670.05       113.36 o
  13   9  -8        155.90        232.11        47.25 o
  14   9  -8        252.45        374.79        63.68 o
  15   9  -8        213.19        247.01        66.98 o
  16   9  -8         35.59        -18.54        22.94 o
   0  10  -8       5346.50       5185.89       294.00 o
   1  10  -8        429.42        537.52        81.28 o
   2  10  -8        468.39        481.91        81.42 o
   3  10  -8        139.90        138.14        53.08 o
   4  10  -8        559.72        640.91       105.86 o
   5  10  -8       2727.61       2771.19       192.38 o
   6  10  -8        486.11        435.88       123.98 o
   7  10  -8        409.93        431.16        88.21 o
   8  10  -8        526.64        522.65        75.88 o
   9  10  -8        408.86        425.58        62.11 o
  10  10  -8       2197.72       2282.32       137.16 o
  11  10  -8        263.77        267.50        62.00 o
  12  10  -8          6.53         28.91        56.37 o
  13  10  -8        152.21         84.79        36.70 o
  14  10  -8        102.04        154.96        38.99 o
  15  10  -8         75.69        183.53        67.96 o
   0  11  -8       1317.48       1442.27       197.25 o
   1  11  -8       1206.09       1227.03       129.59 o
   2  11  -8        221.61        267.30        53.31 o
   3  11  -8       1863.92       2081.59       153.39 o
   4  11  -8       1352.83       1439.94       164.62 o
   5  11  -8        508.06        610.57       100.62 o
   6  11  -8       2355.07       2547.60       169.00 o
   7  11  -8        434.01        549.73        93.79 o
   8  11  -8        237.26        173.40        47.52 o
   9  11  -8         46.94         33.47        49.78 o
  10  11  -8        800.56        920.86       174.46 o
  11  11  -8        112.36        187.04        75.51 o
  12  11  -8        112.47         88.22        27.85 o
  13  11  -8        364.73        295.97        37.27 o
  14  11  -8        300.81        424.03       126.63 o
   0  12  -8        239.11        175.87        57.09 o
   1  12  -8       2316.97       2346.39       142.29 o
   2  12  -8         11.91        -10.28        24.69 o
   3  12  -8        230.81        243.81        60.20 o
   4  12  -8        228.62        113.48        40.98 o
   5  12  -8       1413.92       1553.24       149.43 o
   6  12  -8        182.42        137.53        45.87 o
   7  12  -8         79.07         11.57        21.64 o
   8  12  -8          6.84        -19.34        24.27 o
   9  12  -8        332.97        306.37       120.24 o
  10  12  -8        143.69        116.48        46.47 o
  11  12  -8        867.54        975.77       179.49 o
  12  12  -8         81.41        100.78        34.81 o
   0  13  -8        747.80        679.28       131.59 o
   1  13  -8        303.06        244.20        42.93 o
   2  13  -8        133.57        157.54        37.54 o
   3  13  -8          4.71         48.14        18.91 o
   4  13  -8        809.90        905.42       127.87 o
   5  13  -8        162.02         73.05        54.25 o
   6  13  -8        646.12        594.60       128.74 o
   7  13  -8         41.51         -5.81        45.31 o
   8  13  -8        132.71        168.79        76.09 o
   9  13  -8         58.93         57.66        35.72 o
  10  13  -8        550.17        483.77       112.97 o
  11  13  -8        127.01        139.41        48.79 o
   0  14  -8        994.34       1067.95       129.83 o
   1  14  -8        403.45        602.14       118.50 o
   2  14  -8         32.76        -20.53        20.53 o
   3  14  -8         13.31        -10.82        21.44 o
   4  14  -8        172.34         31.67        34.98 o
   5  14  -8        208.84        157.36        25.99 o
   6  14  -8        131.79        116.81        58.09 o
   7  14  -8         82.90        -24.08        54.02 o
   8  14  -8          9.29        -27.88        58.09 o
   0  15  -8        227.87        275.33        73.19 o
   1  15  -8        482.85        475.21        66.34 o
   2  15  -8        224.50        133.26        34.31 o
   3  15  -8        311.31        238.95        47.83 o
   4  15  -8         22.43         -1.45        26.66 o
   2   0  -7       1973.13       1836.98        68.30 o
   4   0  -7       1416.99       1609.39        79.32 o
   6   0  -7       4616.71       4424.08       135.19 o
   8   0  -7       2414.35       2611.81       111.28 o
  10   0  -7        787.45        932.90        78.40 o
  12   0  -7       4468.46       4176.75       157.66 o
  14   0  -7        604.90        600.19        99.64 o
  16   0  -7       2559.74       2737.21       175.26 o
  18   0  -7        494.60        541.36       139.41 o
   1   1  -7       1258.55       1364.22        45.72 o
   2   1  -7       4728.95       4985.40        91.25 o
   3   1  -7      15074.55      14488.52       178.97 o
   4   1  -7         46.18         53.63        17.28 o
   5   1  -7       1816.15       1877.73        59.44 o
   6   1  -7       2311.32       2154.49        64.77 o
   7   1  -7       4379.91       4651.21        96.11 o
   8   1  -7        794.09        748.07        44.81 o
   9   1  -7       1498.91       1535.67        60.32 o
  10   1  -7        841.03        898.32        51.66 o
  11   1  -7        668.10        701.44        49.10 o
  12   1  -7        768.99        971.80        69.77 o
  13   1  -7       7668.53       7792.86       171.12 o
  14   1  -7        315.06        220.47        36.97 o
  15   1  -7        645.11        776.21        82.81 o
  16   1  -7        207.47        217.78        42.10 o
  17   1  -7       1311.45       1303.08        95.89 o
  18   1  -7        255.20        228.69        67.22 o
  19   1  -7         55.43         83.74        32.54 o
  20   1  -7        150.73        128.23        44.73 o
   1   2  -7        113.30         96.63        17.68 o
   2   2  -7       9955.64       9736.58       125.15 o
   3   2  -7        470.73        393.47        34.46 o
   4   2  -7      10771.39      10951.67       139.33 o
   5   2  -7       2166.04       2440.91        66.29 o
   6   2  -7      14402.14      14315.51       165.36 o
   7   2  -7      10731.16      11052.02       146.97 o
   8   2  -7        674.61        797.41        43.00 o
   9   2  -7       2019.26       1898.26        63.91 o
  10   2  -7        245.03        174.05        23.53 o
  11   2  -7       1411.99       1514.57        77.21 o
  12   2  -7       2150.29       2285.50        94.10 o
  13   2  -7        361.99        477.89        54.16 o
  14   2  -7        972.42       1011.53        73.83 o
  15   2  -7        164.71        135.17        30.43 o
  16   2  -7        735.45        904.20        82.23 o
  17   2  -7        743.96        987.59        82.38 o
  18   2  -7        126.53         63.08        34.71 o
  19   2  -7        138.21        132.84        31.13 o
  20   2  -7        224.47        203.79        34.48 o
   1   3  -7       3616.72       3633.57        74.14 o
   2   3  -7       4225.94       4409.66        85.71 o
   3   3  -7       2536.23       2667.94        78.31 o
   4   3  -7       1433.63       1441.02        53.70 o
   5   3  -7        167.08        204.38        20.94 o
   6   3  -7       2293.71       2322.52        61.07 o
   7   3  -7       1453.14       1400.16        46.23 o
   8   3  -7       6516.52       6335.21        99.03 o
   9   3  -7         33.07         28.46        24.90 o
  10   3  -7        217.35        281.11        43.68 o
  11   3  -7       2234.61       2426.90        97.97 o
  12   3  -7       1017.00       1287.06        83.65 o
  13   3  -7       1046.11       1028.69        81.64 o
  14   3  -7        820.65        786.33        80.65 o
  15   3  -7         27.99         48.43        16.24 o
  16   3  -7         33.14         61.69        18.28 o
  17   3  -7        224.61        243.93        43.51 o
  18   3  -7        982.34       1131.02       115.94 o
  19   3  -7         39.38         47.08        22.92 o
  20   3  -7        190.60        248.09        49.93 o
   1   4  -7       1478.56       1421.63        49.78 o
   2   4  -7       3190.54       3150.13        71.95 o
   3   4  -7      10532.41      10138.88       138.03 o
   4   4  -7        817.85        889.00        43.83 o
   5   4  -7       4373.98       4851.96        94.21 o
   6   4  -7       1874.41       1999.77        89.51 o
   7   4  -7       5275.30       5230.00       145.13 o
   8   4  -7         32.97         29.21        27.82 o
   9   4  -7       1885.02       1903.41        87.09 o
  10   4  -7          7.58         -9.50        25.23 o
  11   4  -7       2918.70       2832.71       119.51 o
  12   4  -7        387.09        354.83        54.29 o
  13   4  -7        613.74        595.52        68.61 o
  14   4  -7        216.44        296.62        48.60 o
  15   4  -7         14.49         -1.00        18.69 o
  16   4  -7         11.16         -2.10        18.80 o
  17   4  -7        560.22        777.15       134.71 o
  18   4  -7         40.22         47.79        38.34 o
  19   4  -7        139.66        140.01        35.45 o
  20   4  -7          0.57        112.01        87.13 o
   1   5  -7        151.66        152.68        26.42 o
   2   5  -7       9828.69       9476.70       150.19 o
   3   5  -7        379.01        414.09        45.76 o
   4   5  -7       2083.17       2080.34        86.79 o
   5   5  -7        124.92        137.52        40.81 o
   6   5  -7        795.06        860.82        85.63 o
   7   5  -7         49.90         28.73        25.31 o
   8   5  -7       3223.38       3075.42       134.37 o
   9   5  -7        317.99        340.39        61.34 o
  10   5  -7        390.60        384.80        61.08 o
  11   5  -7        348.83        395.99        66.73 o
  12   5  -7       1889.61       1704.29       106.19 o
  13   5  -7        684.71        791.31        89.51 o
  14   5  -7        610.00        743.27        88.02 o
  15   5  -7        106.46        124.00        21.57 o
  16   5  -7        900.38        924.55       125.58 o
  17   5  -7         37.06         25.98        19.53 o
  18   5  -7       1207.85        982.85       148.95 o
  19   5  -7          5.99        138.24        40.66 o
   1   6  -7       5895.26       5983.61       141.21 o
   2   6  -7       2048.43       2137.13        83.88 o
   3   6  -7       3179.45       3237.79       117.04 o
   4   6  -7        689.15        802.68        78.31 o
   5   6  -7        868.21        899.54        66.20 o
   6   6  -7       2560.13       2427.36        98.93 o
   7   6  -7        322.19        363.55        62.96 o
   8   6  -7       1009.34       1077.30        93.71 o
   9   6  -7       1070.88       1091.11        95.72 o
  10   6  -7       1397.32       1423.92       110.27 o
  11   6  -7        524.94        492.89        73.06 o
  12   6  -7       2847.71       2719.92       135.40 o
  13   6  -7        588.62        624.34        80.54 o
  14   6  -7       1307.55       1314.22        97.07 o
  15   6  -7        115.22        130.50        74.39 o
  16   6  -7        116.42         92.14        39.34 o
  17   6  -7        696.20        893.48       126.61 o
  18   6  -7        290.65        400.78        95.98 o
  19   6  -7        251.76        186.52        62.55 o
   1   7  -7       1820.50       1706.25        79.79 o
   2   7  -7        613.91        676.08        72.90 o
   3   7  -7       4334.74       4234.70       140.75 o
   4   7  -7        813.43        914.05        79.14 o
   5   7  -7         51.38         66.04        26.60 o
   6   7  -7       1443.01       1445.80       105.13 o
   7   7  -7       1589.99       1544.36       109.35 o
   8   7  -7       1021.60       1039.08       111.84 o
   9   7  -7       1436.16       1560.54       111.28 o
  10   7  -7          1.42          3.11        17.32 o
  11   7  -7        943.17        975.96        87.58 o
  12   7  -7        451.59        638.26        66.45 o
  13   7  -7       1755.76       1891.13       112.68 o
  14   7  -7        360.62        508.27        95.93 o
  15   7  -7        220.58        153.81        49.94 o
  16   7  -7        146.32        141.43        46.48 o
  17   7  -7        703.05        710.85       103.75 o
  18   7  -7        228.22        161.54        52.09 o
   1   8  -7        444.48        387.27        58.03 o
   2   8  -7       3847.85       3930.89       145.66 o
   3   8  -7        425.19        463.97        64.09 o
   4   8  -7       6385.94       6116.75       178.96 o
   5   8  -7        405.48        435.87        68.01 o
   6   8  -7       1332.62       1443.12       110.63 o
   7   8  -7        240.58        235.78        56.09 o
   8   8  -7        193.78        253.40        53.73 o
   9   8  -7        209.35        133.51        35.79 o
  10   8  -7        543.58        637.88        85.96 o
  11   8  -7         48.02         84.89        39.04 o
  12   8  -7       2421.69       2429.10       130.10 o
  13   8  -7        178.01        107.79        94.80 o
  14   8  -7        185.35        102.31        32.60 o
  15   8  -7        122.33         99.77        37.00 o
  16   8  -7        860.00       1122.85       126.39 o
  17   8  -7         36.75        107.52        51.14 o
  18   8  -7       1310.91       1343.11       281.14 o
   1   9  -7        119.73        132.52        46.66 o
   2   9  -7       1563.89       1599.33       121.81 o
   3   9  -7       4711.06       4537.50       166.56 o
   4   9  -7         28.08         19.79        14.34 o
   5   9  -7       1630.77       1636.59       138.00 o
   6   9  -7       1846.38       1900.29       123.12 o
   7   9  -7       2730.16       2906.58       150.50 o
   8   9  -7        369.78        382.94        75.46 o
   9   9  -7        568.96        605.21        85.36 o
  10   9  -7        558.75        537.84        78.16 o
  11   9  -7        498.71        701.99        69.74 o
  12   9  -7        157.65        206.24        66.94 o
  13   9  -7       2197.29       2342.07       168.82 o
  14   9  -7         42.03        -33.11        33.11 o
  15   9  -7        112.70        151.71        78.42 o
  16   9  -7        189.84        319.82        55.36 o
  17   9  -7        401.80        264.38        76.83 o
   1  10  -7        343.20        282.69        61.51 o
   2  10  -7        314.81        371.17        71.91 o
   3  10  -7       1077.84       1134.91       117.51 o
   4  10  -7       2143.07       2175.41       138.05 o
   5  10  -7        841.54        885.43       121.82 o
   6  10  -7       2054.95       1901.84       144.34 o
   7  10  -7       1442.18       1469.18       114.89 o
   8  10  -7        531.22        608.82        84.10 o
   9  10  -7        434.32        461.61        70.00 o
  10  10  -7         46.27         61.77        27.88 o
  11  10  -7        786.31        953.81       114.05 o
  12  10  -7        518.89        546.70       108.32 o
  13  10  -7        382.86        388.10       120.78 o
  14  10  -7         42.98         50.73        38.34 o
  15  10  -7        297.83        169.36        34.29 o
  16  10  -7        360.35        465.99        92.06 o
   1  11  -7        119.42        101.29        50.14 o
   2  11  -7       2081.57       2190.35       134.44 o
   3  11  -7        589.62        620.09        89.01 o
   4  11  -7        509.38        529.01        99.90 o
   5  11  -7        520.10        480.56        85.46 o
   6  11  -7        507.25        562.99        98.87 o
   7  11  -7        286.12        193.24        50.65 o
   8  11  -7       1894.39       2087.32       153.31 o
   9  11  -7          1.81        -14.21        52.86 o
  10  11  -7        227.11        195.91        37.42 o
  11  11  -7         47.26        128.45        36.30 o
  12  11  -7        743.68        883.42       133.66 o
  13  11  -7        405.00        413.02        65.35 o
  14  11  -7          1.83         72.60        68.59 o
   1  12  -7       1560.59       1671.95       131.94 o
   2  12  -7         96.87         59.96        26.29 o
   3  12  -7       1174.67       1636.03       139.45 o
   4  12  -7        192.30         88.54        34.00 o
   5  12  -7        263.50        277.52        88.20 o
   6  12  -7        201.36        137.77        53.28 o
   7  12  -7        769.32        655.89       102.15 o
   8  12  -7         42.64         20.12        37.66 o
   9  12  -7       1289.61       1433.26       233.35 o
  10  12  -7        209.81        117.32        57.50 o
  11  12  -7        765.12        921.52       180.27 o
  12  12  -7          5.43        -40.08        40.08 o
  13  12  -7        111.85         28.73       128.95 o
   1  13  -7        166.32        134.86        40.41 o
   2  13  -7       1955.69       2217.13       159.71 o
   3  13  -7        412.04        311.63       112.33 o
   4  13  -7         26.78        -12.91        16.13 o
   5  13  -7        154.44        112.40        27.71 o
   6  13  -7        745.81        764.77        88.13 o
   7  13  -7         42.57         48.48        33.20 o
   8  13  -7       1127.05       1416.78       221.88 o
   9  13  -7         93.44         61.16        48.79 o
  10  13  -7         31.00        234.67        77.84 o
  11  13  -7        182.42         81.06        45.31 o
   1  14  -7        572.55        468.72        69.49 o
   2  14  -7        424.06        330.43       100.88 o
   3  14  -7        306.44        200.46        42.28 o
   4  14  -7        148.18         99.23        20.56 o
   5  14  -7         95.47         25.88        29.22 o
   6  14  -7        339.61        456.88        95.84 o
   7  14  -7        353.57        475.96        93.64 o
   8  14  -7        388.34        162.41        50.03 o
   9  14  -7        127.63        156.83        85.97 o
   1  15  -7        186.92        242.94        74.35 o
   2  15  -7        571.76        437.66        72.00 o
   3  15  -7        432.34        507.67        57.50 o
   4  15  -7        411.52        379.81        71.35 o
   5  15  -7         54.68         78.29        58.67 o
   0   0  -6       7653.73       7898.81       189.94 o
   2   0  -6       5283.08       5494.67       151.65 o
   4   0  -6       1319.21       1158.52        63.85 o
   6   0  -6      11774.58      11526.01       211.23 o
   8   0  -6       1472.99       1649.70        85.81 o
  10   0  -6       8367.58       8369.68       206.01 o
  12   0  -6        612.19        674.93        69.48 o
  14   0  -6       3697.12       3659.04       196.73 o
  16   0  -6       3952.92       3992.82       299.72 o
  18   0  -6        183.89        189.36        58.09 o
  20   0  -6        542.36        549.49       154.51 o
   0   1  -6        569.35        485.21        40.31 o
   1   1  -6       7743.93       7222.92       114.20 o
   2   1  -6        765.13        777.96        39.89 o
   3   1  -6       3399.57       3373.95        70.03 o
   4   1  -6      12921.81      13455.73       146.02 o
   5   1  -6       4815.88       5248.89        91.52 o
   6   1  -6       2035.34       1966.88        58.61 o
   7   1  -6          7.88        -10.35        11.52 o
   8   1  -6        183.08        140.80        23.93 o
   9   1  -6      11473.21      11053.54       154.21 o
  10   1  -6       1449.12       1440.76        58.43 o
  11   1  -6       4660.68       4615.43       106.20 o
  12   1  -6       3486.40       3263.90        92.57 o
  13   1  -6        379.67        528.22        53.81 o
  14   1  -6         15.64         23.34        20.85 o
  15   1  -6       1300.18       1441.17        91.30 o
  16   1  -6        150.43         92.52        28.95 o
  17   1  -6        251.84        299.64        64.46 o
  18   1  -6        192.17        222.68        48.13 o
  19   1  -6       1705.10       1671.04       189.94 o
  20   1  -6        348.80        476.71        79.06 o
  21   1  -6        153.27        196.33        58.09 o
   0   2  -6       4211.67       3749.77        96.89 o
   1   2  -6       2312.00       2534.66        59.51 o
   2   2  -6         57.58         38.09         9.17 o
   3   2  -6      29828.07      30439.40       231.08 o
   4   2  -6       6633.29       6909.82       102.90 o
   5   2  -6       5750.59       5507.20        92.12 o
   6   2  -6       6077.24       5955.16        97.80 o
   7   2  -6       1283.54       1121.12        44.31 o
   8   2  -6        768.40        825.79        41.25 o
   9   2  -6        849.42        946.28        46.25 o
  10   2  -6       4804.76       4743.48       100.62 o
  11   2  -6        168.56        168.05        34.06 o
  12   2  -6       2261.20       2302.58        92.46 o
  13   2  -6       1205.12       1167.46        77.18 o
  14   2  -6       1233.06       1486.85        84.76 o
  15   2  -6       1176.03       1229.63        75.08 o
  16   2  -6        449.61        373.67        42.48 o
  17   2  -6         20.81         73.17        23.81 o
  18   2  -6        177.19        124.98        33.86 o
  19   2  -6        134.79        161.27        52.37 o
  20   2  -6        353.39        432.06        71.92 o
  21   2  -6          5.08         33.97        96.42 o
   0   3  -6      19277.57      18776.43       277.73 o
   1   3  -6       2426.05       2654.22        60.29 o
   2   3  -6       2844.27       3190.19        64.93 o
   3   3  -6       4655.95       4629.07        95.72 o
   4   3  -6       9109.82       9353.40       126.74 o
   5   3  -6       2857.11       2932.99        63.47 o
   6   3  -6        256.46        348.72        21.22 o
   7   3  -6       6685.11       6788.75        88.79 o
   8   3  -6       1800.08       1649.92        46.87 o
   9   3  -6       1013.43       1118.23        68.82 o
  10   3  -6       6671.37       6565.81       149.98 o
  11   3  -6       1057.98       1141.89        81.84 o
  12   3  -6       1997.54       2122.33       103.96 o
  13   3  -6       7074.88       7002.26       180.62 o
  14   3  -6        142.08        244.56        41.65 o
  15   3  -6       1809.87       1851.93        97.08 o
  16   3  -6        865.80        985.03        67.88 o
  17   3  -6        833.10        771.56        63.99 o
  18   3  -6        225.84        277.97        52.22 o
  19   3  -6        110.01         81.14        49.88 o
  20   3  -6        532.44        647.40        81.66 o
   0   4  -6       8582.19       8432.30       162.10 o
   1   4  -6      17469.24      17380.55       168.07 o
   2   4  -6        503.15        518.70        31.42 o
   3   4  -6       6687.47       6766.01       111.82 o
   4   4  -6       3531.91       3613.43        93.74 o
   5   4  -6       3985.95       3867.49       116.10 o
   6   4  -6       1057.94       1159.00        67.78 o
   7   4  -6        103.34        107.89        32.00 o
   8   4  -6        234.10        306.06        51.71 o
   9   4  -6       3647.64       3514.45       138.03 o
  10   4  -6       1813.60       1733.45        89.71 o
  11   4  -6       1902.29       1830.58        93.52 o
  12   4  -6         70.48         36.62        26.89 o
  13   4  -6       1073.86       1101.24        80.16 o
  14   4  -6        687.47        702.65        74.10 o
  15   4  -6       2669.46       2900.42       121.45 o
  16   4  -6         15.84         27.57        22.93 o
  17   4  -6        102.75         99.27        23.33 o
  18   4  -6        156.44        138.04        49.06 o
  19   4  -6        375.94        414.81        95.84 o
  20   4  -6        379.08        234.84        53.85 o
   0   5  -6       8832.54       9024.94       224.17 o
   1   5  -6        727.85        812.15        52.93 o
   2   5  -6       3989.25       4326.77       108.42 o
   3   5  -6       1799.27       1946.14        94.18 o
   4   5  -6       1841.00       1495.55        72.34 o
   5   5  -6        369.72        319.24        39.49 o
   6   5  -6       4679.87       4362.20       149.23 o
   7   5  -6        427.86        479.21        65.50 o
   8   5  -6        650.74        711.50        80.95 o
   9   5  -6        339.38        368.63        61.87 o
  10   5  -6        612.26        791.32        76.70 o
  11   5  -6         17.35         20.96        23.71 o
  12   5  -6         69.67         71.21        24.37 o
  13   5  -6        331.84        353.33        58.23 o
  14   5  -6       5102.35       5264.98       186.63 o
  15   5  -6        318.16        336.07        87.19 o
  16   5  -6       1124.50       1060.89       128.80 o
  17   5  -6        124.85        121.93        47.14 o
  18   5  -6        231.34        266.63        38.37 o
  19   5  -6        275.15        305.17       135.34 o
  20   5  -6        198.69        158.71        36.59 o
   0   6  -6       7740.69       7343.23       216.02 o
   1   6  -6       5284.24       5101.31       127.05 o
   2   6  -6       1846.45       1684.82        72.29 o
   3   6  -6       1980.67       1937.27        74.71 o
   4   6  -6        470.06        667.31        61.10 o
   5   6  -6       4468.54       4495.18       129.40 o
   6   6  -6       1028.01        918.66        59.59 o
   7   6  -6       1219.93       1201.98        90.07 o
   8   6  -6          6.25          5.62        15.76 o
   9   6  -6       2314.22       2119.05       114.30 o
  10   6  -6       1993.86       1959.63       115.14 o
  11   6  -6        821.01        914.35        84.67 o
  12   6  -6        738.55        702.97        72.06 o
  13   6  -6        125.89        171.51        39.71 o
  14   6  -6        613.32        526.18        89.40 o
  15   6  -6       1180.38       1330.94       120.45 o
  16   6  -6        789.39        961.73       130.04 o
  17   6  -6        203.95        242.37        57.88 o
  18   6  -6         45.36        117.93        42.33 o
  19   6  -6        137.72        155.21        43.79 o
   0   7  -6       1225.68       1231.81        98.85 o
   1   7  -6       4295.27       4287.67       123.93 o
   2   7  -6       2584.87       2439.06        92.35 o
   3   7  -6       1940.83       1848.16        92.94 o
   4   7  -6       2055.57       2120.24       111.25 o
   5   7  -6       2519.33       2433.88       102.78 o
   6   7  -6       1245.66       1270.94        75.05 o
   7   7  -6       2470.86       2378.78       123.43 o
   8   7  -6        274.97        330.22        58.65 o
   9   7  -6         55.60         83.21        29.32 o
  10   7  -6        855.16        924.50        88.36 o
  11   7  -6        739.11        804.50        92.75 o
  12   7  -6        377.66        360.89        57.31 o
  13   7  -6       1859.40       1981.72       151.65 o
  14   7  -6        839.89       1155.27       147.46 o
  15   7  -6       2201.91       2309.36       173.07 o
  16   7  -6        435.36        377.53       138.24 o
  17   7  -6       1976.23       2214.14       158.51 o
  18   7  -6        166.34        102.39        87.71 o
  19   7  -6        537.90        491.66       160.67 o
   0   8  -6      20130.54      19861.38       410.97 o
   1   8  -6       2396.31       2405.32       112.74 o
   2   8  -6       1046.09       1067.86        86.53 o
   3   8  -6        716.91        813.97        82.24 o
   4   8  -6       1256.24       1401.51        88.65 o
   5   8  -6        895.33        844.59        81.84 o
   6   8  -6       1802.33       1755.91       111.16 o
   7   8  -6        904.55        988.61       103.89 o
   8   8  -6        266.07        278.75        55.90 o
   9   8  -6        171.41        193.22        42.72 o
  10   8  -6       3143.76       3301.55       152.29 o
  11   8  -6       1395.62       1468.23       103.85 o
  12   8  -6         49.34         95.47        39.46 o
  13   8  -6        191.73        239.75        59.75 o
  14   8  -6        652.07        925.41       132.40 o
  15   8  -6         24.17          3.13        56.22 o
  16   8  -6        814.28        839.06       122.01 o
  17   8  -6         18.93        114.04        51.12 o
  18   8  -6         90.74        119.40        29.52 o
   0   9  -6       1743.71       1713.71       167.67 o
   1   9  -6       4012.58       4103.66       175.71 o
   2   9  -6        411.20        467.88        63.51 o
   3   9  -6        739.17        777.46        84.98 o
   4   9  -6       1260.68       1284.71        90.81 o
   5   9  -6       1782.73       2099.94       121.64 o
   6   9  -6       2518.46       2674.04       141.77 o
   7   9  -6       2427.57       2397.33       135.84 o
   8   9  -6         91.85         61.63        23.67 o
   9   9  -6        933.94        976.39        96.39 o
  10   9  -6       1084.41       1122.09        91.51 o
  11   9  -6        582.86        804.56       125.13 o
  12   9  -6         64.31         73.55        25.07 o
  13   9  -6        477.81        454.74       138.71 o
  14   9  -6        871.49       1076.83       126.47 o
  15   9  -6        267.41        257.51       100.31 o
  16   9  -6        210.05        187.50        45.95 o
  17   9  -6        281.19        166.75       130.11 o
   0  10  -6        287.05        188.77        74.35 o
   1  10  -6        336.77        349.74        70.33 o
   2  10  -6       1010.45       1208.14       114.93 o
   3  10  -6       1069.06       1143.29       107.75 o
   4  10  -6       1123.90       1245.16       104.46 o
   5  10  -6       1661.36       1778.51       139.92 o
   6  10  -6        832.94        979.55       109.24 o
   7  10  -6        465.72        435.28        70.06 o
   8  10  -6          4.34         54.88        20.54 o
   9  10  -6       1822.37       1894.93       119.72 o
  10  10  -6       2420.52       2569.95       184.24 o
  11  10  -6        219.02        195.19        53.72 o
  12  10  -6        444.44        503.13        97.88 o
  13  10  -6          1.22         92.63        29.57 o
  14  10  -6         92.90        116.93        99.03 o
  15  10  -6         91.72        194.12        54.70 o
  16  10  -6        499.06        597.39       115.34 o
   0  11  -6       1063.80        836.28       148.27 o
   1  11  -6        678.32        609.89        88.39 o
   2  11  -6        756.33        749.68        97.66 o
   3  11  -6         95.65        121.79        37.42 o
   4  11  -6       1914.46       1982.90       152.26 o
   5  11  -6        100.98         79.55        40.72 o
   6  11  -6       1507.15       1549.97       138.23 o
   7  11  -6         69.62         50.85        44.15 o
   8  11  -6        386.65        300.05        97.50 o
   9  11  -6        931.00        964.03       137.16 o
  10  11  -6       1824.38       1706.93       192.96 o
  11  11  -6        486.39        620.68        97.01 o
  12  11  -6        146.76        188.77       117.91 o
  13  11  -6        283.93        243.58        46.79 o
  14  11  -6        788.41        762.29        93.13 o
  15  11  -6        195.90        117.80        55.76 o
   0  12  -6        186.46        299.72       103.39 o
   1  12  -6        538.85        506.15        77.72 o
   2  12  -6        174.11         86.42        30.98 o
   3  12  -6        710.76        700.77       106.03 o
   4  12  -6         38.28        -10.68        23.22 o
   5  12  -6       3894.93       4278.45       220.65 o
   6  12  -6        126.12        153.03        66.61 o
   7  12  -6          2.41         24.69        34.30 o
   8  12  -6        746.00        737.19       185.87 o
   9  12  -6        510.53        556.48       123.01 o
  10  12  -6        128.01        139.69        69.12 o
  11  12  -6         90.86         48.08        69.12 o
  12  12  -6          6.85         46.55        38.92 o
  13  12  -6        271.37        165.18        51.52 o
   0  13  -6       1232.83       1776.19       258.48 o
   1  13  -6        486.28        503.70        79.83 o
   2  13  -6       1366.47       1543.82       138.03 o
   3  13  -6        223.79        302.59        75.36 o
   4  13  -6        363.78        292.43        65.49 o
   5  13  -6          2.30          3.47        30.79 o
   6  13  -6        245.19        313.28        90.71 o
   7  13  -6        216.03         30.20        58.09 o
   8  13  -6        302.90        234.54        85.39 o
   9  13  -6        142.85        127.22        66.80 o
  10  13  -6       1202.76       1237.06       217.82 o
  11  13  -6        202.60         65.68        94.10 o
  12  13  -6        331.19        412.41       116.17 o
   0  14  -6        687.71        749.76       143.20 o
   1  14  -6        361.70        214.04        44.20 o
   2  14  -6         37.54         25.29        45.12 o
   3  14  -6        123.39         53.34        21.62 o
   4  14  -6        734.33        697.83       227.63 o
   5  14  -6       1256.52       1387.16       258.48 o
   6  14  -6        372.79        563.43       207.95 o
   7  14  -6        168.59         91.68        40.68 o
   8  14  -6        159.39        108.44        83.64 o
   9  14  -6        807.83        733.08       134.55 o
   0  15  -6        483.58        502.49       106.88 o
   1  15  -6        963.56        760.58       100.14 o
   2  15  -6         28.47         68.89        33.69 o
   3  15  -6        221.54        110.88        32.19 o
   4  15  -6         45.48         27.50        25.76 o
   5  15  -6        317.90        298.56       101.07 o
   6  15  -6        242.17        200.28        66.22 o
   2   0  -5       6041.48       5981.71       388.27 o
   4   0  -5      11440.64      10744.35       179.79 o
   6   0  -5      19209.11      19713.50       247.62 o
   8   0  -5        701.37        716.95        57.84 o
  10   0  -5        427.77        427.80        53.60 o
  12   0  -5      12388.39      12222.91       239.59 o
  14   0  -5       2071.50       2287.15       117.07 o
  16   0  -5       1981.47       1872.69       196.33 o
  18   0  -5        178.31        188.20        63.89 o
  20   0  -5        236.56        144.05        59.25 o
   1   1  -5       2738.32       2738.11        52.43 o
   2   1  -5       4523.24       5063.39        77.84 o
   3   1  -5      18595.20      18235.68       158.46 o
   4   1  -5       2182.80       2102.41        53.39 o
   5   1  -5       7519.63       7572.23       104.21 o
   6   1  -5       1082.03       1204.87        44.56 o
   7   1  -5       5432.06       5309.01        94.19 o
   8   1  -5        575.42        613.10        39.61 o
   9   1  -5       1899.63       2064.31        65.25 o
  10   1  -5        194.69        240.44        30.11 o
  11   1  -5          2.72         14.50        11.10 o
  12   1  -5        533.42        533.25        42.56 o
  13   1  -5       9284.18       9097.45       176.52 o
  14   1  -5        219.18        198.70        33.91 o
  15   1  -5       1158.14       1078.29        68.92 o
  16   1  -5       1220.95       1260.52        99.79 o
  17   1  -5        933.25        955.22        88.93 o
  18   1  -5        838.10        877.39        92.35 o
  19   1  -5        164.08        238.03        54.02 o
  20   1  -5        168.14        152.85        29.88 o
  21   1  -5        423.62        541.54        69.77 o
   1   2  -5      20445.48      20423.40       156.74 o
   2   2  -5       9135.43       9406.67       108.00 o
   3   2  -5        383.14        334.89        25.88 o
   4   2  -5      15846.15      15450.42       146.54 o
   5   2  -5         20.79         10.69         9.74 o
   6   2  -5       1013.56        888.08        35.99 o
   7   2  -5       9623.72       9555.68       122.61 o
   8   2  -5        905.91        857.00        41.11 o
   9   2  -5       1939.44       1901.48        60.08 o
  10   2  -5        301.72        304.50        29.04 o
  11   2  -5       1040.87        986.09        50.84 o
  12   2  -5       2621.64       2478.56       102.43 o
  13   2  -5        174.78        181.51        43.12 o
  14   2  -5        320.61        262.84        39.28 o
  15   2  -5        301.78        265.44        36.46 o
  16   2  -5        287.84        370.33        46.71 o
  17   2  -5        346.00        351.03        62.63 o
  18   2  -5        300.63        253.76        52.30 o
  19   2  -5         42.66         70.62        63.31 o
  20   2  -5        144.93         78.02        80.74 o
  21   2  -5        552.83        608.74       126.63 o
   1   3  -5       2548.20       2660.78        56.73 o
   2   3  -5       9805.92       9208.73       110.11 o
   3   3  -5      13678.97      14318.42       140.25 o
   4   3  -5       4341.55       4527.63        76.88 o
   5   3  -5       6260.72       6568.70        79.53 o
   6   3  -5        873.67        793.23        54.47 o
   7   3  -5       1182.24       1179.52        62.13 o
   8   3  -5       9776.42       9843.13       167.22 o
   9   3  -5       1907.54       1895.92        48.93 o
  10   3  -5        125.99        212.80        40.25 o
  11   3  -5        318.68        330.75        49.87 o
  12   3  -5       1698.24       1599.54        86.41 o
  13   3  -5        643.60        681.80        70.94 o
  14   3  -5        479.56        616.46        57.64 o
  15   3  -5        223.82        223.20        34.32 o
  16   3  -5        306.53        390.72        49.41 o
  17   3  -5        296.81        330.77        64.31 o
  18   3  -5       1632.07       1793.82       124.26 o
  19   3  -5         16.94         17.16        20.80 o
  20   3  -5        438.80        393.02        70.78 o
  21   3  -5        403.95        328.86        62.15 o
   1   4  -5       8559.26       8582.12       124.36 o
   2   4  -5       3751.17       3719.82        81.50 o
   3   4  -5       2284.34       2611.58        76.41 o
   4   4  -5         63.07         43.82        18.38 o
   5   4  -5          7.55        -15.56        17.90 o
   6   4  -5       1774.10       1866.80        90.36 o
   7   4  -5       9095.79       8637.32       196.39 o
   8   4  -5          6.60          4.16        23.81 o
   9   4  -5       1492.40       1437.89        88.47 o
  10   4  -5        511.11        427.82        59.31 o
  11   4  -5       5620.23       5662.00       157.07 o
  12   4  -5        319.15        358.28        52.37 o
  13   4  -5        641.51        829.60        70.92 o
  14   4  -5        167.73        157.48        29.72 o
  15   4  -5       1019.40       1056.18        77.83 o
  16   4  -5        264.93        219.85        54.28 o
  17   4  -5       1161.82       1179.17       119.13 o
  18   4  -5        137.59        193.74        47.49 o
  19   4  -5        174.37        153.40        32.25 o
  20   4  -5         26.96         -4.65        32.53 o
   1   5  -5        499.49        508.93        42.62 o
   2   5  -5       4889.40       4770.38       110.61 o
   3   5  -5       3799.01       3815.24       124.12 o
   4   5  -5        632.28        727.62        56.85 o
   5   5  -5       2322.38       2305.18        82.77 o
   6   5  -5        136.87        101.11        22.28 o
   7   5  -5       1669.24       1735.12        94.32 o
   8   5  -5       2820.25       2625.56       117.29 o
   9   5  -5       1264.27       1316.83        89.93 o
  10   5  -5        202.40        165.32        39.37 o
  11   5  -5        380.32        464.45        65.93 o
  12   5  -5       2732.70       2955.01       131.90 o
  13   5  -5        154.83        141.22        30.76 o
  14   5  -5       1770.99       1776.22       104.63 o
  15   5  -5         89.00         50.33        32.22 o
  16   5  -5        598.90        730.20       103.15 o
  17   5  -5         38.28         81.15        34.88 o
  18   5  -5       2114.23       2145.93       193.53 o
  19   5  -5         55.31         68.16        29.86 o
  20   5  -5         77.05         68.02        53.44 o
   1   6  -5       9750.21       9418.44       169.92 o
   2   6  -5       3798.52       3787.71       106.18 o
   3   6  -5       2741.83       2540.04        93.52 o
   4   6  -5       2646.52       2514.49        96.16 o
   5   6  -5         44.63         58.00        20.07 o
   6   6  -5        887.89        881.43        58.28 o
   7   6  -5       1084.31       1045.06        80.25 o
   8   6  -5        551.41        625.01        75.90 o
   9   6  -5         75.01         69.26        31.38 o
  10   6  -5        113.24         91.52        29.85 o
  11   6  -5        780.65        742.34        71.43 o
  12   6  -5       2384.81       2247.20       116.63 o
  13   6  -5        506.56        572.11        75.44 o
  14   6  -5         70.40         52.68        28.34 o
  15   6  -5        239.31        231.33        75.54 o
  16   6  -5        640.42        773.39       118.57 o
  17   6  -5       1397.45       1494.63       144.21 o
  18   6  -5        451.93        453.94        65.69 o
  19   6  -5        269.97        256.48        34.54 o
   1   7  -5       1130.41       1232.54        68.04 o
   2   7  -5       2285.18       2343.52        89.71 o
   3   7  -5      15233.98      15122.39       230.59 o
   4   7  -5        104.30         94.06        28.17 o
   5   7  -5        693.37        686.93        61.83 o
   6   7  -5       1109.94       1095.01        68.86 o
   7   7  -5        464.74        599.87        75.71 o
   8   7  -5        915.04        860.85        82.06 o
   9   7  -5        604.49        660.88        70.45 o
  10   7  -5        452.06        362.47        69.59 o
  11   7  -5         99.32         66.12        25.23 o
  12   7  -5         72.02        -16.97        30.05 o
  13   7  -5       3060.60       3034.88       188.89 o
  14   7  -5        455.46        521.78        98.54 o
  15   7  -5        255.16        289.88        62.81 o
  16   7  -5        284.19        322.12        62.96 o
  17   7  -5       1023.17       1279.80       147.77 o
  18   7  -5        124.36         67.61        33.08 o
  19   7  -5        289.02        237.91        37.90 o
   1   8  -5        139.81        239.24        27.01 o
   2   8  -5       3845.80       4078.35       144.17 o
   3   8  -5        937.70       1072.87        81.01 o
   4   8  -5       6780.82       6898.41       206.14 o
   5   8  -5       1337.41       1362.24        82.28 o
   6   8  -5       3510.74       3408.39       130.74 o
   7   8  -5         54.13         49.14        24.48 o
   8   8  -5         52.58        119.48        36.33 o
   9   8  -5          8.81          3.95        18.83 o
  10   8  -5        452.86        424.57        80.33 o
  11   8  -5         12.80         15.89        37.73 o
  12   8  -5       1456.69       1796.26       166.42 o
  13   8  -5         17.28        110.12        50.06 o
  14   8  -5       1006.67       1152.52       155.39 o
  15   8  -5         10.72         26.36        66.80 o
  16   8  -5        625.51        658.92       146.44 o
  17   8  -5        197.26        244.78        53.04 o
  18   8  -5        343.12        349.37        86.87 o
   1   9  -5        206.43        260.83        46.19 o
   2   9  -5       1267.47       1309.19        94.40 o
   3   9  -5       3280.11       3155.57       132.75 o
   4   9  -5        962.03       1029.00        87.77 o
   5   9  -5        108.80        101.88        31.96 o
   6   9  -5         80.21         99.54        34.45 o
   7   9  -5       2961.05       3061.03       147.30 o
   8   9  -5        596.21        640.32        85.65 o
   9   9  -5        601.24        724.49        90.50 o
  10   9  -5        139.72        124.87        29.17 o
  11   9  -5       1085.97       1300.56       164.61 o
  12   9  -5         46.01         45.20        46.85 o
  13   9  -5       2684.54       2580.43       179.95 o
  14   9  -5         17.14         24.19        26.06 o
  15   9  -5        535.75        340.47        88.46 o
  16   9  -5        182.83        154.50        43.81 o
  17   9  -5         84.19        136.91       102.23 o
   1  10  -5       1226.73       1405.17       126.66 o
   2  10  -5        519.13        661.83        91.92 o
   3  10  -5        688.27        647.40        90.16 o
   4  10  -5       1506.92       1473.23        98.03 o
   5  10  -5       3252.23       3357.98       184.00 o
   6  10  -5       3433.15       3687.22       167.47 o
   7  10  -5       1012.09       1120.81       100.78 o
   8  10  -5       2933.39       3011.27       149.67 o
   9  10  -5       1529.59       1601.84       119.69 o
  10  10  -5        374.88        339.97        73.59 o
  11  10  -5       1038.63       1163.26       148.77 o
  12  10  -5        278.51        501.23        93.08 o
  13  10  -5        242.78        224.93        56.51 o
  14  10  -5        130.59         68.05        31.92 o
  15  10  -5        137.26          2.74        34.33 o
  16  10  -5        174.78        150.07        45.13 o
   1  11  -5          8.05        -13.88        13.88 o
   2  11  -5       1555.02       1771.13       123.83 o
   3  11  -5        947.01       1049.91       116.78 o
   4  11  -5         66.69         60.46        19.26 o
   5  11  -5        322.35        356.46        74.14 o
   6  11  -5        460.52        441.38        77.22 o
   7  11  -5        145.42        232.72        56.83 o
   8  11  -5       3308.15       3450.51       215.07 o
   9  11  -5        175.67        210.89        57.03 o
  10  11  -5         51.94        122.60        62.58 o
  11  11  -5         96.27        143.49        38.20 o
  12  11  -5        963.70        894.93       142.02 o
  13  11  -5        250.96        413.11       143.47 o
  14  11  -5         97.98        124.23        35.89 o
  15  11  -5         38.04        -14.67        29.95 o
   1  12  -5        571.63        657.42        93.11 o
   2  12  -5         43.91         26.18        42.84 o
   3  12  -5        575.08        541.36        78.77 o
   4  12  -5         88.11         36.78        42.81 o
   5  12  -5         43.96        -22.66        22.66 o
   6  12  -5         19.73        -20.33        20.33 o
   7  12  -5       1552.47       1589.17       203.30 o
   8  12  -5         23.38         39.50        40.08 o
   9  12  -5        943.67        901.89       175.45 o
  10  12  -5         74.66         67.87        44.72 o
  11  12  -5        913.59        765.68        89.14 o
  12  12  -5        163.72        121.45        26.22 o
  13  12  -5        572.96        724.44        86.64 o
  14  12  -5        371.75        328.37        65.64 o
   1  13  -5        137.04         63.89        22.13 o
   2  13  -5       1298.22       1731.08       127.98 o
   3  13  -5        158.42        100.26        22.84 o
   4  13  -5         44.03          5.24        19.17 o
   5  13  -5         93.40         48.73        18.96 o
   6  13  -5        964.73        830.02       273.00 o
   7  13  -5        239.77        209.83        72.61 o
   8  13  -5       1905.89       1986.58       223.94 o
   9  13  -5         40.07         10.90        41.24 o
  10  13  -5        113.11        147.88        42.42 o
  11  13  -5         14.58        -12.21        63.31 o
  12  13  -5        541.28        392.28        88.26 o
   1  14  -5        266.24        151.85        63.05 o
   2  14  -5        437.15        348.21        78.66 o
   3  14  -5        928.37        889.06       122.02 o
   4  14  -5        234.91        183.16        64.83 o
   6  14  -5        833.28       1011.14       252.67 o
   7  14  -5        394.86        291.21        79.63 o
   8  14  -5        115.78         18.12        42.07 o
   9  14  -5         27.66          5.62        27.30 o
  10  14  -5        142.85        166.83       138.83 o
   1  15  -5        177.40        116.14        26.26 o
   2  15  -5        411.47        228.54        63.05 o
   3  15  -5       1247.12       1437.76       227.21 o
   4  15  -5        341.15        147.58        47.24 o
   5  15  -5        187.12        118.56        73.77 o
   6  15  -5         62.23         64.84        28.19 o
   7  15  -5        690.08        572.13       145.21 o
   0   0  -4     110504.29     114728.30      1395.80 o
   2   0  -4      30039.54      32190.92       301.15 o
   4   0  -4        919.06        852.33        45.42 o
   6   0  -4        882.53       1003.51        53.21 o
   8   0  -4      10844.57      10848.25       187.93 o
  10   0  -4      17657.60      17535.88       262.76 o
  12   0  -4        303.25        258.12        41.61 o
  14   0  -4       1268.88       1382.79       118.92 o
  16   0  -4       1226.35       1049.03       146.38 o
  18   0  -4       1128.83        972.36       140.57 o
  20   0  -4       1912.17       1891.28       178.90 o
   0   1  -4      33252.93      33353.77       300.40 o
   1   1  -4       3114.98       3013.18        53.04 o
   2   1  -4      68726.25      70421.30       500.68 o
   3   1  -4       5934.17       5986.49        79.77 o
   4   1  -4       2705.95       2651.59        54.54 o
   5   1  -4       3230.51       3144.03        62.26 o
   6   1  -4       3272.90       3158.41        66.30 o
   7   1  -4       6755.31       6484.41       100.50 o
   8   1  -4       1482.39       1463.74        51.31 o
   9   1  -4       2358.64       2304.50        66.22 o
  10   1  -4        513.25        604.63        42.28 o
  11   1  -4       2121.72       2231.81        71.09 o
  12   1  -4        334.94        360.34        40.79 o
  13   1  -4       4905.24       4986.01       122.14 o
  14   1  -4        763.74        987.25        67.76 o
  15   1  -4        653.45        717.11        77.69 o
  16   1  -4        501.03        454.81        74.28 o
  17   1  -4        805.92       1017.34        89.30 o
  18   1  -4        222.65        226.18        59.95 o
  19   1  -4       1100.86       1216.21       104.54 o
  20   1  -4         88.13         15.10        25.56 o
  21   1  -4        182.59        312.50        40.66 o
   0   2  -4      16169.39      17034.96       186.86 o
   1   2  -4       3023.92       2834.88        50.75 o
   2   2  -4       1537.93       1782.75        40.62 o
   3   2  -4       1211.29       1232.47        35.88 o
   4   2  -4       5098.02       5465.69        73.98 o
   5   2  -4       9496.55       9908.39       114.40 o
   6   2  -4      10155.06      10171.27       114.25 o
   7   2  -4       1748.94       1741.94        49.71 o
   8   2  -4       1841.50       1726.40        53.17 o
   9   2  -4       4037.85       3841.04        83.66 o
  10   2  -4       7235.27       7053.01       126.90 o
  11   2  -4       6799.95       6500.54       127.21 o
  12   2  -4       2237.11       2132.83        78.72 o
  13   2  -4        540.59        564.82        61.29 o
  14   2  -4        131.70        141.68        29.10 o
  15   2  -4        679.22        719.07        61.82 o
  16   2  -4       1373.69       1369.14        88.25 o
  17   2  -4        290.73        340.75        61.06 o
  18   2  -4          5.99         44.70        18.58 o
  19   2  -4        599.99        612.76        96.07 o
  20   2  -4        390.40        408.95        77.99 o
  21   2  -4        137.95        160.08        23.15 o
   0   3  -4      14117.55      14623.74       185.24 o
   1   3  -4       7680.92       7389.88        89.82 o
   2   3  -4        764.76        792.42        31.04 o
   3   3  -4       1760.15       1917.53        57.27 o
   4   3  -4      20194.73      19597.88       189.57 o
   5   3  -4       1310.02       1364.10        60.52 o
   6   3  -4      17155.38      17239.66       203.04 o
   7   3  -4       1730.52       1828.78        74.90 o
   8   3  -4         53.51         84.74        10.05 o
   9   3  -4       4629.60       4502.45        84.25 o
  10   3  -4       1897.18       1867.08        60.34 o
  11   3  -4       2495.40       2358.80        95.92 o
  12   3  -4       1552.87       1580.64        83.02 o
  13   3  -4          3.17         13.91        20.05 o
  14   3  -4       1697.25       1831.60        90.13 o
  15   3  -4        178.81        120.39        26.68 o
  16   3  -4       1095.28       1170.66        75.91 o
  17   3  -4         29.92         26.26        24.26 o
  18   3  -4        572.09        683.45        70.54 o
  19   3  -4        156.94         61.81        35.21 o
  20   3  -4        392.65        395.01        67.03 o
  21   3  -4        141.06        183.55        40.66 o
   0   4  -4       3645.90       3520.64       121.09 o
   1   4  -4       4274.55       4267.86        93.37 o
   2   4  -4       3005.59       3032.82        85.16 o
   3   4  -4         86.13         91.13        22.83 o
   4   4  -4         17.68         -3.20        11.67 o
   5   4  -4      13560.88      12979.63       174.43 o
   6   4  -4       1222.06       1227.45        73.09 o
   7   4  -4       3828.43       3931.63       127.49 o
   8   4  -4       2854.82       2580.37       107.24 o
   9   4  -4       4740.52       4598.14       144.68 o
  10   4  -4       2960.13       2968.79       122.41 o
  11   4  -4        901.01       1056.60        81.72 o
  12   4  -4       4666.25       4559.61       156.51 o
  13   4  -4        456.53        552.88        71.15 o
  14   4  -4       1445.61       1430.52        91.29 o
  15   4  -4       1836.50       2018.69       103.10 o
  16   4  -4        628.63        787.37       107.91 o
  17   4  -4         18.60         21.88        31.95 o
  18   4  -4         40.55        128.51        27.47 o
  19   4  -4        745.86        795.27       116.53 o
  20   4  -4        167.17        198.65        52.28 o
   0   5  -4      13597.08      12750.96       256.61 o
   1   5  -4       3316.96       3523.98        93.41 o
   2   5  -4       7387.70       6926.44       130.65 o
   3   5  -4        878.65        922.57        48.11 o
   4   5  -4       2174.01       2345.38        84.52 o
   5   5  -4       2627.18       2677.20        87.83 o
   6   5  -4        204.17        254.25        31.02 o
   7   5  -4       1539.37       1498.88        85.46 o
   8   5  -4        433.68        403.40        56.37 o
   9   5  -4        577.16        560.74        59.29 o
  10   5  -4       5451.07       5372.02       166.56 o
  11   5  -4        906.93        884.81        77.20 o
  12   5  -4       2394.36       2361.68       115.46 o
  13   5  -4       1050.53        792.91       112.17 o
  14   5  -4        677.12        794.52       110.88 o
  15   5  -4        303.59        398.17        74.08 o
  16   5  -4        746.73        840.85       117.36 o
  17   5  -4        519.74        684.62       178.62 o
  18   5  -4       1029.12       1135.78       132.99 o
  19   5  -4         89.02        226.79        42.54 o
  20   5  -4       1107.91       1233.86       173.68 o
   0   6  -4       4110.18       4109.96       156.59 o
   1   6  -4       2494.79       2645.89        88.56 o
   2   6  -4       1063.11       1091.61        57.02 o
   3   6  -4       3422.94       3213.54       103.42 o
   4   6  -4       6557.78       6507.35       152.98 o
   5   6  -4        950.35        906.51        58.97 o
   6   6  -4        457.02        457.36        45.24 o
   7   6  -4        122.55         91.33        18.20 o
   8   6  -4        442.20        476.17        64.70 o
   9   6  -4        166.13        127.56        36.89 o
  10   6  -4       1077.73       1223.97        91.94 o
  11   6  -4        205.06        288.28        75.25 o
  12   6  -4       1171.91       1186.79       141.60 o
  13   6  -4        672.58        932.58       129.44 o
  14   6  -4       1103.12       1199.06       128.90 o
  15   6  -4       2751.08       2990.44       179.06 o
  16   6  -4       1487.59       1506.60       142.78 o
  17   6  -4         41.10         80.61        39.08 o
  18   6  -4         28.44        102.98        44.73 o
  19   6  -4        155.59        142.56        31.41 o
  20   6  -4        104.85         76.00        30.83 o
   0   7  -4       4146.01       4194.44       170.92 o
   1   7  -4       7776.21       7515.11       161.07 o
   2   7  -4        122.06        109.61        21.49 o
   3   7  -4        988.29       1021.37        63.61 o
   4   7  -4        724.68        834.68        65.24 o
   5   7  -4         10.03         32.65        16.88 o
   6   7  -4       1670.83       1766.54        84.82 o
   7   7  -4        280.51        354.65        56.46 o
   8   7  -4         60.72         86.04        33.01 o
   9   7  -4       2622.45       2533.43       122.02 o
  10   7  -4        234.52        240.10        81.66 o
  11   7  -4        386.05        419.62        90.81 o
  12   7  -4         31.47        132.41        48.29 o
  13   7  -4        326.58        256.81        76.59 o
  14   7  -4        808.34        820.35       123.98 o
  15   7  -4       1203.37       1272.90       136.51 o
  16   7  -4         22.75         23.27        28.19 o
  17   7  -4         88.59         72.57        21.43 o
  18   7  -4          2.10         -6.59        23.04 o
  19   7  -4       1360.89       1601.04       129.40 o
   0   8  -4      14349.93      14380.73       341.26 o
   1   8  -4         99.00        134.13        26.16 o
   2   8  -4       2797.63       2773.76       103.38 o
   3   8  -4        273.79        296.54        51.66 o
   4   8  -4       3351.38       3351.75       127.58 o
   5   8  -4       1442.90       1524.50        86.61 o
   6   8  -4       4553.38       4518.76       144.01 o
   7   8  -4        600.57        690.64        72.34 o
   8   8  -4        594.78        688.15        83.66 o
   9   8  -4        738.30        769.75       113.82 o
  10   8  -4       1862.25       1963.51       159.81 o
  11   8  -4        723.76        690.61       117.44 o
  12   8  -4        534.70        569.46       110.15 o
  13   8  -4       1237.29       1621.87       157.45 o
  14   8  -4        723.53       1110.80       148.23 o
  15   8  -4         31.84         37.30        26.80 o
  16   8  -4       1390.04       1573.45       135.21 o
  17   8  -4         69.15        144.86        31.84 o
  18   8  -4          6.44        -27.48        27.48 o
   0   9  -4       3456.14       3267.00       171.32 o
   1   9  -4       4132.06       4050.74       148.94 o
   2   9  -4        657.62        741.03        81.52 o
   3   9  -4       1151.14       1196.54        90.07 o
   4   9  -4        922.26        976.06        91.00 o
   5   9  -4       3657.52       3678.30       140.05 o
   6   9  -4         48.39         48.84        29.16 o
   7   9  -4        594.65        620.54        70.42 o
   8   9  -4       1043.73       1191.63        99.20 o
   9   9  -4       4247.68       4241.92       231.59 o
  10   9  -4       1776.07       1798.54       171.90 o
  11   9  -4       2425.73       2423.35       178.04 o
  12   9  -4        216.21        230.28        70.04 o
  13   9  -4        302.90        352.98        76.11 o
  14   9  -4         59.53         68.89        40.21 o
  15   9  -4        676.36        819.13       121.74 o
  16   9  -4        122.95        171.10        36.95 o
  17   9  -4        173.49        189.27        59.67 o
  18   9  -4        266.32        250.93        63.89 o
   0  10  -4       9250.11       9207.77       377.62 o
   1  10  -4       1005.95       1206.17       111.40 o
   2  10  -4       1033.27       1101.39       117.31 o
   3  10  -4        249.70        296.54        51.91 o
   4  10  -4        530.22        637.41        76.37 o
   5  10  -4       6276.36       6000.07       189.47 o
   6  10  -4        243.46        206.06        47.05 o
   7  10  -4       1074.28       1127.79        93.65 o
   8  10  -4       1179.16       1160.47        94.77 o
   9  10  -4        449.59        489.26        94.93 o
  10  10  -4       2639.87       2728.80       187.76 o
  11  10  -4        424.84        457.48        93.15 o
  12  10  -4        207.14        250.82        68.43 o
  13  10  -4        286.80        395.03       143.49 o
  14  10  -4        131.89        187.56        55.76 o
  15  10  -4       1361.19       1415.38       150.41 o
  16  10  -4        120.31        119.12        49.96 o
  17  10  -4         93.69         76.67        44.15 o
   0  11  -4        425.34        361.07        94.07 o
   1  11  -4        603.00        536.61        80.83 o
   2  11  -4        376.93        404.02        70.85 o
   3  11  -4       4538.87       4747.42       195.80 o
   4  11  -4       1246.41       1199.67       109.41 o
   5  11  -4        464.46        501.51        92.26 o
   6  11  -4       1783.07       1735.12       113.69 o
   7  11  -4       1617.87       1652.01       111.66 o
   8  11  -4         36.58         81.84        58.06 o
   9  11  -4         86.86         47.25        23.16 o
  10  11  -4       1251.14       1396.80       153.51 o
  11  11  -4         91.43        121.95        37.86 o
  12  11  -4        183.33         96.54        31.49 o
  13  11  -4        124.92        101.23        41.66 o
  14  11  -4       1696.28       1744.73       168.42 o
  15  11  -4         13.23         28.04        23.12 o
   0  12  -4        261.27        189.56        90.03 o
   1  12  -4        527.50        522.94        80.44 o
   2  12  -4        603.95        496.01        80.15 o
   3  12  -4        356.72        365.74        64.07 o
   4  12  -4        591.91        409.67        80.85 o
   5  12  -4       1246.09       1353.60       126.39 o
   6  12  -4        276.02        271.45       101.60 o
   7  12  -4         86.61         55.76        88.29 o
   8  12  -4          4.34        -10.36        27.30 o
   9  12  -4       1310.08       1669.47       143.63 o
  10  12  -4        595.89        446.46       129.43 o
  11  12  -4       1217.57       1352.47       142.66 o
  12  12  -4         46.46         51.09        36.41 o
  13  12  -4          7.96         57.23        78.11 o
  14  12  -4        163.63        250.77        52.86 o
   0  13  -4        358.06        330.05        97.03 o
   1  13  -4        242.18        207.82        43.83 o
   2  13  -4        786.24        734.38        94.29 o
   3  13  -4         64.62         14.02        29.55 o
   4  13  -4       1708.92       1808.92       140.55 o
   5  13  -4         53.40         96.34        47.23 o
   6  13  -4       1446.05       1270.73       212.00 o
   7  13  -4         25.37         49.10        49.37 o
   8  13  -4        110.38         69.44        41.46 o
   9  13  -4         21.82        -26.25        30.41 o
  10  13  -4         59.16         50.92        54.02 o
  11  13  -4        107.27        117.92        52.86 o
  12  13  -4        262.96        143.59        89.45 o
   0  14  -4       1888.99       2084.43       183.90 o
   1  14  -4        424.64        380.96        77.39 o
   2  14  -4        205.33        160.98        42.26 o
   3  14  -4        261.82        230.21        45.22 o
   4  14  -4        259.02        305.53       126.63 o
   5  14  -4        568.92        548.26       123.05 o
   6  14  -4         61.78        -30.00        47.05 o
   7  14  -4         26.92          0.43        65.64 o
   8  14  -4        175.34        190.04        56.04 o
   9  14  -4        634.95        730.22       157.11 o
  10  14  -4        373.63        343.90        83.98 o
   0  15  -4         15.61         45.72        29.62 o
   1  15  -4         82.58         60.40        35.59 o
   2  15  -4        386.15        249.45       153.41 o
   3  15  -4       1280.10       1476.42       213.18 o
   4  15  -4        139.77         33.07        29.86 o
   5  15  -4        875.83       1121.03       187.57 o
   6  15  -4        161.87        161.45        73.89 o
   7  15  -4        619.99        599.45       141.43 o
   0  16  -4       1641.16       1451.46       119.79 o
   1  16  -4        123.83        183.55        55.76 o
   2  16  -4         46.86         36.01        38.34 o
   2   0  -3      25074.54      25006.05       234.09 o
   4   0  -3       8664.42       8910.06       130.49 o
   6   0  -3      20694.26      21187.20       305.85 o
   8   0  -3        951.96        800.52        52.20 o
  10   0  -3       5401.26       5416.45       138.55 o
  12   0  -3       2734.78       2407.61       118.40 o
  14   0  -3        847.57        773.02        88.91 o
  16   0  -3       1559.31       1497.89       127.51 o
  18   0  -3       1857.91       2001.64       188.20 o
  20   0  -3        458.20        443.78       112.69 o
   1   1  -3       2820.63       2541.51        45.40 o
   2   1  -3      18535.85      18993.37       145.97 o
   3   1  -3       8673.62       8279.58        85.89 o
   4   1  -3       8652.18       8693.81        93.25 o
   5   1  -3       2707.84       2750.26        55.37 o
   6   1  -3       1955.23       2016.64        51.16 o
   7   1  -3       9839.54       9260.24       116.78 o
   8   1  -3       4409.33       4434.72        84.42 o
   9   1  -3        427.82        428.78        35.05 o
  10   1  -3        438.07        425.86        36.79 o
  11   1  -3        784.36        785.99        49.25 o
  12   1  -3        637.75        729.15        49.83 o
  13   1  -3       7247.64       7428.29       146.07 o
  14   1  -3        919.58        973.26        65.36 o
  15   1  -3         49.49         54.09        26.55 o
  16   1  -3        417.86        350.77        52.83 o
  17   1  -3       1302.76       1495.08       108.85 o
  18   1  -3        545.02        628.35        89.45 o
  19   1  -3         13.37         36.80        27.88 o
  20   1  -3         45.40         98.24        28.46 o
  21   1  -3        194.52        109.26        27.94 o
   1   2  -3      29225.78      28525.09       178.24 o
   2   2  -3        102.12        179.61        15.38 o
   3   2  -3       1543.41       1399.20        30.14 o
   4   2  -3      19108.60      19764.82       184.95 o
   5   2  -3       4653.33       4862.89        65.16 o
   6   2  -3       6452.19       6263.18        85.26 o
   7   2  -3       3227.17       3180.90        65.99 o
   8   2  -3        928.86        783.02        40.18 o
   9   2  -3       1593.99       1480.74        41.26 o
  10   2  -3       1238.25       1234.15        42.14 o
  11   2  -3       1405.91       1552.34        62.10 o
  12   2  -3       3080.31       2942.10        88.23 o
  13   2  -3        417.91        451.91        55.06 o
  14   2  -3        895.30        998.66        71.32 o
  15   2  -3        248.69        160.95        41.35 o
  16   2  -3        345.72        358.91        60.05 o
  17   2  -3        619.50        628.38        72.99 o
  18   2  -3         58.79        110.33        41.33 o
  19   2  -3        190.09        262.12        53.69 o
  20   2  -3        130.34        112.78        33.69 o
  21   2  -3        611.96        571.37        51.26 o
   1   3  -3       1561.12       1587.71        50.18 o
   2   3  -3       4640.28       5084.94        87.49 o
   3   3  -3        821.12        785.40        44.73 o
   4   3  -3        626.56        760.59        37.35 o
   5   3  -3       2004.67       1971.85        77.71 o
   6   3  -3       1278.65       1431.84        62.55 o
   7   3  -3        342.37        346.43        16.84 o
   8   3  -3      14481.15      13920.62       152.38 o
   9   3  -3        793.88        812.96        40.47 o
  10   3  -3         28.21         23.32        14.37 o
  11   3  -3        660.06        667.85        41.98 o
  12   3  -3       2764.26       2767.11       103.58 o
  13   3  -3       1109.27       1072.51        74.07 o
  14   3  -3        571.03        728.37        63.25 o
  15   3  -3        249.75        276.16        40.13 o
  16   3  -3        272.70        323.18        77.64 o
  17   3  -3        221.23        213.45        37.14 o
  18   3  -3       1167.18       1129.32        80.97 o
  19   3  -3         48.05         22.42        36.01 o
  20   3  -3        444.85        529.74       112.69 o
  21   3  -3         53.00        110.36        30.20 o
   1   4  -3       6468.42       6165.01       110.46 o
   2   4  -3       2840.28       2890.23        81.15 o
   3   4  -3      19834.77      20584.42       233.26 o
   4   4  -3       2976.48       3037.49        83.69 o
   5   4  -3       1957.94       1993.83        65.45 o
   6   4  -3        209.59        204.99        23.41 o
   7   4  -3      12532.43      11987.93       215.91 o
   8   4  -3        745.20        748.93        60.61 o
   9   4  -3       5433.96       5375.54       151.52 o
  10   4  -3        903.34        682.45        59.94 o
  11   4  -3       3518.72       3577.68       130.20 o
  12   4  -3        143.18        125.27        27.27 o
  13   4  -3        130.44        137.39        77.97 o
  14   4  -3        331.64        337.05        72.25 o
  15   4  -3        439.75        448.23        78.21 o
  16   4  -3          0.23          2.84        19.98 o
  17   4  -3       1910.54       1963.61       174.22 o
  18   4  -3        200.83        222.01        64.32 o
  19   4  -3        299.68        295.55        65.25 o
  20   4  -3        197.61        274.17        61.57 o
  21   4  -3        663.17        651.72        77.84 o
   1   5  -3       1803.86       1853.37        67.40 o
   2   5  -3       6867.99       6417.04       135.12 o
   3   5  -3       2164.12       2161.33        70.59 o
   4   5  -3       1029.74       1017.59        57.72 o
   5   5  -3        734.36        868.02        52.08 o
   6   5  -3         33.32         -0.23         7.24 o
   7   5  -3       2351.96       2401.18        70.79 o
   8   5  -3       4964.27       4623.17       142.07 o
   9   5  -3        472.68        451.11        82.34 o
  10   5  -3        540.68        498.88        87.73 o
  11   5  -3        803.43        601.18        81.83 o
  12   5  -3       2695.43       2713.54       120.62 o
  13   5  -3        981.25        953.29        76.67 o
  14   5  -3        243.35        315.73        70.51 o
  15   5  -3        208.42        203.10        45.67 o
  16   5  -3       1831.54       1943.63       136.94 o
  17   5  -3        311.05        255.75        92.51 o
  18   5  -3       1329.49       1441.73       120.72 o
  19   5  -3         52.89         86.94        58.37 o
  20   5  -3        659.86        498.73       192.26 o
   1   6  -3       5221.09       5329.10       124.66 o
   2   6  -3        631.31        619.89        48.39 o
   3   6  -3       2929.10       2806.32        87.91 o
   4   6  -3       3636.77       3634.87       112.84 o
   5   6  -3       3171.81       3257.90       105.22 o
   6   6  -3       3223.92       3026.05        99.83 o
   7   6  -3       3758.75       3838.41       109.13 o
   8   6  -3        636.32        758.47       104.81 o
   9   6  -3       1145.31       1199.05       135.25 o
  10   6  -3        439.19        467.53        61.60 o
  11   6  -3        389.13        350.33        55.79 o
  12   6  -3       2963.20       3109.38       129.72 o
  13   6  -3        824.84        909.00       123.24 o
  14   6  -3        171.75        230.45        60.11 o
  15   6  -3        395.11        339.30        68.33 o
  16   6  -3        783.19        816.88       120.74 o
  17   6  -3        477.57        623.73        99.93 o
  18   6  -3        163.64         97.19        63.34 o
  19   6  -3        184.94        137.70        42.84 o
  20   6  -3         35.72         85.89        31.15 o
   1   7  -3        854.32        953.44        63.58 o
   2   7  -3       2265.85       2286.09        87.92 o
   3   7  -3       7526.92       6975.70       164.92 o
   4   7  -3         48.68         17.55        11.02 o
   5   7  -3         17.48          6.14        17.74 o
   6   7  -3        230.51        246.52        37.93 o
   7   7  -3       7311.08       6778.78       172.03 o
   8   7  -3       4653.32       4776.46       218.49 o
   9   7  -3       1019.41       1089.23        85.33 o
  10   7  -3        317.64        221.33        45.25 o
  11   7  -3        203.96        188.71        32.83 o
  12   7  -3        293.13        334.95        78.27 o
  13   7  -3       5816.51       6143.98       267.67 o
  14   7  -3        173.61        196.20        56.73 o
  15   7  -3        160.88        120.90        42.26 o
  16   7  -3         13.44         -9.79        45.31 o
  17   7  -3        951.42        928.00       117.97 o
  18   7  -3        170.97        138.78        31.64 o
  19   7  -3        156.55        138.89        36.54 o
   1   8  -3        460.73        501.95        55.80 o
   2   8  -3       5138.04       5029.77       138.28 o
   3   8  -3        490.08        522.26        62.50 o
   4   8  -3       3933.24       3626.99       130.85 o
   5   8  -3        248.42        270.91        45.19 o
   6   8  -3       7585.33       7439.77       184.40 o
   7   8  -3       1237.59       1252.47        89.68 o
   8   8  -3       2492.79       2897.59       180.02 o
   9   8  -3       1557.29       1617.27       108.26 o
  10   8  -3        458.44        526.05        70.87 o
  11   8  -3        290.14        335.82        85.02 o
  12   8  -3       1955.62       1950.44       178.31 o
  13   8  -3         89.02         50.24        38.53 o
  14   8  -3        236.76        315.25        86.90 o
  15   8  -3         26.76         13.57        24.42 o
  16   8  -3       1808.21       1776.35       150.28 o
  17   8  -3         65.20         90.52        23.30 o
  18   8  -3        109.20        129.45        44.61 o
  19   8  -3        208.80        325.28        55.76 o
   1   9  -3        718.48        832.32        80.06 o
   2   9  -3       1460.29       1462.35        93.92 o
   3   9  -3       6896.55       6732.71       190.16 o
   4   9  -3       1187.73       1164.12        86.09 o
   5   9  -3         30.90         14.40        18.07 o
   6   9  -3        368.63        438.18        60.52 o
   7   9  -3       1946.67       1824.32       134.98 o
   8   9  -3        522.34        544.68        82.04 o
   9   9  -3        424.67        341.67        83.78 o
  10   9  -3         70.22         84.52        44.43 o
  11   9  -3          6.02         87.33        35.84 o
  12   9  -3        499.50        487.03        97.73 o
  13   9  -3       1749.45       2009.09       165.15 o
  14   9  -3          9.10         49.39        41.76 o
  15   9  -3        407.81        515.72        94.19 o
  16   9  -3         58.74         26.04        25.52 o
  17   9  -3        521.29        455.90        79.29 o
  18   9  -3         95.74        180.09        75.31 o
   1  10  -3        735.14        866.82       104.59 o
   2  10  -3        195.32        187.53        47.09 o
   3  10  -3        331.62        362.64        56.56 o
   4  10  -3       1870.97       1936.34       122.42 o
   5  10  -3        298.39        310.06        53.39 o
   6  10  -3       5748.79       5522.40       199.16 o
   7  10  -3       1461.39       1408.67       145.58 o
   8  10  -3       1425.23       1609.49       147.17 o
   9  10  -3         80.01         61.36        32.93 o
  10  10  -3        149.97        141.10        48.89 o
  11  10  -3        319.93        216.82        61.20 o
  12  10  -3       1246.55       1322.69       171.01 o
  13  10  -3         52.96        101.22        38.57 o
  14  10  -3        740.06        736.16       116.82 o
  15  10  -3         50.38         22.28        23.69 o
  16  10  -3        313.87        256.77        47.36 o
  17  10  -3        219.09        176.14        34.20 o
   1  11  -3         25.61         -1.70        16.53 o
   2  11  -3       1501.80       1615.03       122.37 o
   3  11  -3        962.45       1023.75       113.75 o
   4  11  -3        253.68        230.73        34.20 o
   5  11  -3        522.75        479.24        72.78 o
   6  11  -3        725.23        804.98        96.85 o
   7  11  -3        224.56        124.60        61.27 o
   8  11  -3       2900.41       3030.51       199.51 o
   9  11  -3        368.66        480.03        91.89 o
  10  11  -3         13.52         32.53        32.04 o
  11  11  -3        314.16        265.24        69.64 o
  12  11  -3        923.20       1000.56       235.01 o
  13  11  -3        424.99        497.84        89.19 o
  14  11  -3        281.16        365.65        76.34 o
  15  11  -3         43.54         93.52        54.63 o
  16  11  -3        203.78        265.24        49.65 o
   1  12  -3        843.39        877.81       108.05 o
   2  12  -3        162.11        124.26        38.32 o
   3  12  -3        664.33        485.22        75.25 o
   4  12  -3        201.62        178.75        47.96 o
   5  12  -3        509.63        485.86        83.58 o
   6  12  -3        190.04        122.52        58.57 o
   7  12  -3       1836.96       2048.46       225.10 o
   8  12  -3        125.83        109.10        64.92 o
   9  12  -3        876.25       1058.71       175.70 o
  10  12  -3          5.44         -9.73        42.34 o
  11  12  -3        184.06        182.39        91.78 o
  12  12  -3         39.24        197.95        55.94 o
  13  12  -3         95.84         63.82        46.29 o
  14  12  -3         35.91        -31.10        38.12 o
   1  13  -3         66.66         57.26        22.37 o
   2  13  -3       2237.77       2539.83       146.36 o
   3  13  -3        529.66        567.34        81.12 o
   4  13  -3         83.22         51.05        28.25 o
   5  13  -3         78.78         54.99        30.92 o
   6  13  -3        101.25         92.59        43.56 o
   7  13  -3        255.35        230.02        79.00 o
   8  13  -3       1551.05       1794.15       210.36 o
   9  13  -3        137.91        242.80        87.13 o
  10  13  -3        341.13        316.33        87.48 o
  11  13  -3         22.24          7.78        36.83 o
  12  13  -3        503.03        430.09        52.50 o
  13  13  -3        123.79        279.74       161.48 o
   1  14  -3        306.02        360.21        59.02 o
   2  14  -3        306.92        418.44        73.66 o
   3  14  -3        900.96        867.68       123.96 o
   4  14  -3        177.77        156.04       134.76 o
   5  14  -3        408.04        366.56        95.13 o
   6  14  -3        318.36        157.02        81.32 o
   7  14  -3        299.49        217.33        67.14 o
   8  14  -3         73.23         15.66        25.04 o
   9  14  -3        176.95        133.43        37.37 o
  10  14  -3         80.37        -62.73        62.73 o
  11  14  -3        222.35        140.57        90.61 o
   1  15  -3         27.89         -4.21        31.04 o
   2  15  -3         58.24         35.00        31.15 o
   3  15  -3       1023.33        967.47       162.42 o
   4  15  -3        117.30        126.63        51.12 o
   5  15  -3         55.00        160.89        66.80 o
   6  15  -3         51.25         22.97        58.67 o
   7  15  -3        446.50        355.23       267.19 o
   8  15  -3        304.67        225.76        76.67 o
   1  16  -3        110.46        209.11        54.60 o
   2  16  -3         91.90         22.39        30.91 o
   3  16  -3         19.64        -20.99        88.87 o
   0   0  -2      26083.27      25656.40      1163.46 o
   2   0  -2      29900.92      29609.50       397.17 o
   4   0  -2      16525.13      16342.24       171.47 o
   6   0  -2       7386.05       8148.39       132.97 o
   8   0  -2       3135.04       3210.07        92.74 o
  10   0  -2       1834.06       1618.68        73.42 o
  12   0  -2        576.39        565.27        69.78 o
  14   0  -2       3616.05       3593.89       148.92 o
  16   0  -2       5339.91       5162.68       261.39 o
  18   0  -2        166.66        250.93        69.70 o
  20   0  -2        885.37        903.82       115.01 o
   0   1  -2      18470.38      18851.82       152.06 o
   1   1  -2      26685.70      28454.88       141.36 o
   2   1  -2      17205.73      17727.37       142.93 o
   3   1  -2       8314.07       8282.27        90.89 o
   4   1  -2       5313.80       5538.83        69.35 o
   5   1  -2       4687.80       5077.70        71.65 o
   6   1  -2       4379.66       4420.66        71.26 o
   7   1  -2      11901.76      12076.18       128.54 o
   8   1  -2       4949.99       4864.25        85.56 o
   9   1  -2      15887.45      14766.04       236.22 o
  10   1  -2        952.58       1135.34        50.52 o
  11   1  -2       3312.43       3440.60        88.70 o
  12   1  -2        504.89        508.84        51.14 o
  13   1  -2         19.01         38.19        22.35 o
  14   1  -2        581.09        582.01        57.91 o
  15   1  -2       1282.75       1299.25        81.52 o
  16   1  -2        279.70        358.59        50.83 o
  17   1  -2        307.42        349.09        52.18 o
  18   1  -2        430.72        365.97        65.12 o
  19   1  -2       3119.36       3219.16       166.22 o
  20   1  -2        213.44        309.67        87.13 o
  21   1  -2         95.82        222.66        92.94 o
   0   2  -2      44724.36      45132.09       375.10 o
   1   2  -2        471.28        462.23        28.98 o
   2   2  -2       7029.12       6808.38        78.38 o
   3   2  -2      14639.57      14504.50       136.00 o
   4   2  -2       2550.26       2434.31        64.59 o
   5   2  -2      13576.02      13420.44       125.76 o
   6   2  -2       6866.62       6864.94        94.65 o
   7   2  -2       3082.12       3061.68        54.03 o
   8   2  -2         18.18         26.66         8.96 o
   9   2  -2        274.88        321.58        24.43 o
  10   2  -2       7652.57       7445.43       110.31 o
  11   2  -2        222.47        207.43        23.23 o
  12   2  -2       1912.09       1988.77        71.86 o
  13   2  -2       3319.72       3189.73        93.70 o
  14   2  -2        261.03        265.64        50.80 o
  15   2  -2       3003.98       3185.76       128.69 o
  16   2  -2       1093.75       1112.65        77.01 o
  17   2  -2        162.08        117.24        54.24 o
  18   2  -2         67.81         72.18        31.18 o
  19   2  -2         75.79         90.23        32.01 o
  20   2  -2       1088.27       1111.92       106.30 o
  21   2  -2        399.11        454.23        55.00 o
   0   3  -2       1867.76       2172.84        92.17 o
   1   3  -2       5390.91       5600.02        99.94 o
   2   3  -2       7975.10       7563.48       105.01 o
   3   3  -2       6255.27       6185.48       104.77 o
   4   3  -2        222.76        367.03        28.89 o
   5   3  -2       1742.21       2092.52        52.48 o
   6   3  -2      10284.90      10535.93       120.36 o
   7   3  -2       8809.79       8906.17       114.05 o
   8   3  -2       3006.90       2743.97        75.58 o
   9   3  -2        165.62        176.63        22.07 o
  10   3  -2       9897.52       9610.14       119.35 o
  11   3  -2        676.51        792.09        54.36 o
  12   3  -2        726.34        720.18        57.50 o
  13   3  -2       1223.83       1231.27        94.19 o
  14   3  -2       1751.79       1825.89       104.06 o
  15   3  -2        268.65        349.66        57.21 o
  16   3  -2        417.82        410.02        59.14 o
  17   3  -2        461.63        489.12        65.22 o
  18   3  -2        480.97        474.19        57.63 o
  19   3  -2        179.84        158.47        29.04 o
  20   3  -2       1008.58        952.61       120.82 o
  21   3  -2        133.49        248.61        55.76 o
   0   4  -2      10096.07      10297.64       201.64 o
   1   4  -2       4178.45       3844.48        98.66 o
   2   4  -2        573.82        654.00        37.01 o
   3   4  -2       6889.30       6967.77       114.05 o
   4   4  -2       2525.06       2529.81        76.00 o
   5   4  -2      43062.18      43967.52       365.36 o
   6   4  -2        604.37        598.67        44.81 o
   7   4  -2       2519.51       2638.02        83.10 o
   8   4  -2        568.42        540.55        52.55 o
   9   4  -2       6140.15       5917.68       144.64 o
  10   4  -2        478.04        589.55        36.91 o
  11   4  -2       5620.91       5604.48       159.64 o
  12   4  -2       1314.78       1344.67        86.08 o
  13   4  -2        173.46         90.98        32.59 o
  14   4  -2       1320.01       1361.04        96.39 o
  15   4  -2          1.45         57.50        27.79 o
  16   4  -2        150.57         89.74        36.28 o
  17   4  -2        138.87         48.41        34.04 o
  18   4  -2          0.45         61.14        45.83 o
  19   4  -2        547.65        489.56        65.64 o
  20   4  -2        174.84        201.20        65.06 o
  21   4  -2        666.51        800.42        87.13 o
   0   5  -2       5674.47       5981.81       179.87 o
   1   5  -2      12271.02      12764.24       177.01 o
   2   5  -2       4740.73       5194.06       120.62 o
   3   5  -2        711.48        726.67        43.07 o
   4   5  -2      15303.44      15179.25       212.85 o
   5   5  -2        511.15        489.36        39.35 o
   6   5  -2       4736.96       4559.82       134.55 o
   7   5  -2       1600.52       1663.32        89.48 o
   8   5  -2       2669.63       2807.95        80.76 o
   9   5  -2       2011.70       2010.88        92.72 o
  10   5  -2       1858.06       1874.19        93.67 o
  11   5  -2       1050.06       1169.91        78.99 o
  12   5  -2        539.51        530.86        55.42 o
  13   5  -2        364.51        355.28        78.59 o
  14   5  -2       1770.85       2142.77       145.23 o
  15   5  -2       1197.05       1138.90       117.49 o
  16   5  -2        717.90        684.44       100.07 o
  17   5  -2         71.54         42.57        23.61 o
  18   5  -2        543.69        498.48        72.80 o
  19   5  -2        341.62        293.38        62.28 o
  20   5  -2        322.49        267.78        78.42 o
   0   6  -2      33722.95      32682.97       457.83 o
   1   6  -2      10144.79       9907.87       170.25 o
   2   6  -2       1033.25       1160.36        64.31 o
   3   6  -2       1371.93       1369.63        62.05 o
   4   6  -2       1065.70       1138.89        57.03 o
   5   6  -2       1581.33       1558.52        71.86 o
   6   6  -2       1669.99       1827.57        95.24 o
   7   6  -2       2700.01       2629.12        90.82 o
   8   6  -2        101.13        105.44        21.66 o
   9   6  -2       1023.77       1148.68        77.09 o
  10   6  -2       3305.95       3340.44       126.99 o
  11   6  -2       3507.52       3306.20       129.16 o
  12   6  -2        560.09        602.87       103.30 o
  13   6  -2        179.71        196.78        61.87 o
  14   6  -2        145.74        247.47        64.93 o
  15   6  -2       1077.79       1138.59       124.34 o
  16   6  -2       1739.32       1974.72       165.61 o
  17   6  -2        888.94        942.17       121.84 o
  18   6  -2        202.72        114.37        81.90 o
  19   6  -2        735.26        693.53        96.97 o
  20   6  -2        530.44        443.36        59.44 o
   0   7  -2        688.57        654.83        84.83 o
   1   7  -2        574.18        728.52        58.03 o
   2   7  -2         96.87        100.42        20.08 o
   3   7  -2       1943.00       1786.50        75.38 o
   4   7  -2        613.97        591.76        45.83 o
   5   7  -2       4743.62       4589.26       135.53 o
   6   7  -2       1807.79       1863.93       108.15 o
   7   7  -2       5439.99       5281.97       142.06 o
   8   7  -2          8.15          7.23        15.52 o
   9   7  -2       1584.31       1481.37        90.80 o
  10   7  -2        291.12        237.71        42.71 o
  11   7  -2        969.45       1181.99       146.37 o
  12   7  -2        146.13        205.21        72.19 o
  13   7  -2       1569.04       1736.39       157.81 o
  14   7  -2        999.17       1232.62       133.48 o
  15   7  -2       2500.32       2706.03       176.21 o
  16   7  -2        133.53        277.65       102.23 o
  17   7  -2        501.75        664.55        94.14 o
  18   7  -2          4.28         40.77        30.61 o
  19   7  -2        801.21        747.04       106.80 o
   0   8  -2      17343.26      17438.56       371.85 o
   1   8  -2        213.16        249.50        39.32 o
   2   8  -2        427.43        502.94        55.05 o
   3   8  -2        553.49        649.21        53.24 o
   4   8  -2       1536.95       1614.57        87.50 o
   5   8  -2       1356.58       1377.59        83.03 o
   6   8  -2       1017.77       1038.64        98.17 o
   7   8  -2       1307.75       1210.30        76.12 o
   8   8  -2       2176.40       2129.69       110.49 o
   9   8  -2        237.34        183.33        40.91 o
  10   8  -2       4223.03       4125.77       219.84 o
  11   8  -2       2276.46       2274.34       165.62 o
  12   8  -2        202.59        213.08        64.99 o
  13   8  -2        708.51        767.06       123.65 o
  14   8  -2        275.82        256.30        65.12 o
  15   8  -2        418.37        401.30        88.65 o
  16   8  -2        281.57        313.66        63.35 o
  17   8  -2         91.42        144.01       151.60 o
  18   8  -2        495.89        464.81        75.38 o
  19   8  -2        176.86        181.93        36.58 o
   0   9  -2       2814.69       2734.43       154.22 o
   1   9  -2       3548.81       3464.82       121.22 o
   2   9  -2         93.03         46.04        23.51 o
   3   9  -2       1519.32       1383.91        98.36 o
   4   9  -2       1953.33       1931.79       101.67 o
   5   9  -2        474.18        367.94        56.75 o
   6   9  -2       2785.58       2626.04       141.88 o
   7   9  -2       6369.27       6412.52       202.54 o
   8   9  -2        438.80        406.61        62.27 o
   9   9  -2      10326.52      10600.48       360.67 o
  10   9  -2        492.30        483.44       103.48 o
  11   9  -2       2470.82       2203.22       176.14 o
  12   9  -2        345.93        271.04        73.80 o
  13   9  -2        601.61        627.61       108.07 o
  14   9  -2        547.64        489.08        87.14 o
  15   9  -2        388.21        532.58        95.20 o
  16   9  -2        139.33        131.72        62.05 o
  17   9  -2        133.84        124.95        36.21 o
  18   9  -2         20.07         64.71        29.09 o
   0  10  -2        313.86        263.67        85.68 o
   1  10  -2        476.13        497.83        66.50 o
   2  10  -2         64.43         66.66        23.48 o
   3  10  -2        261.13        340.18        57.41 o
   4  10  -2       1608.33       1631.38        97.23 o
   5  10  -2       2023.45       1857.74       104.30 o
   6  10  -2       1246.68       1360.44       115.05 o
   7  10  -2        387.94        379.36        54.50 o
   8  10  -2        158.77        249.31        68.52 o
   9  10  -2        928.80       1032.55       141.86 o
  10  10  -2       1816.18       1844.44       159.31 o
  11  10  -2       2115.36       2068.84       170.49 o
  12  10  -2        895.97        858.84       130.39 o
  13  10  -2        106.66        119.32        31.26 o
  14  10  -2         35.77          5.99        22.10 o
  15  10  -2         75.47        147.94        43.20 o
  16  10  -2       1206.41       1529.97       155.80 o
  17  10  -2         67.92         40.95        39.09 o
   0  11  -2       2103.09       2249.93       189.00 o
   1  11  -2       1120.32       1139.53       120.27 o
   2  11  -2        636.10        774.31        96.82 o
   3  11  -2         23.65        -12.18        18.61 o
   4  11  -2       3024.38       3376.28       160.61 o
   5  11  -2        781.76        729.78        82.01 o
   6  11  -2        619.42        634.25       113.33 o
   7  11  -2         11.28         12.56        23.60 o
   8  11  -2         78.00        114.87        67.05 o
   9  11  -2       1559.61       1757.75       154.60 o
  10  11  -2        367.06        483.74        86.96 o
  11  11  -2        652.42        867.23       136.11 o
  12  11  -2        259.74        194.93       136.97 o
  13  11  -2        210.44        262.59        58.88 o
  14  11  -2        514.02        523.22       161.45 o
  15  11  -2        190.22        134.38        71.93 o
  16  11  -2        248.58        196.94        66.96 o
   0  12  -2          1.70        -16.07        40.66 o
   1  12  -2        566.77        724.84        97.00 o
   2  12  -2        172.55        164.19        42.66 o
   3  12  -2        685.21        801.62        99.69 o
   4  12  -2       1012.05       1167.35       108.42 o
   5  12  -2       5554.50       5823.97       349.36 o
   6  12  -2        168.41         76.64        51.10 o
   7  12  -2        320.81        467.12        92.67 o
   8  12  -2        234.75        230.94        58.21 o
   9  12  -2         74.20        112.12        29.88 o
  10  12  -2         40.68         12.28        20.22 o
  11  12  -2         43.48         69.41        31.15 o
  12  12  -2         27.99         11.35        37.63 o
  13  12  -2        248.21        157.54        53.77 o
  14  12  -2        112.18         50.06        29.32 o
   0  13  -2       1728.41       1955.71       197.84 o
   1  13  -2        304.06        238.49        49.68 o
   2  13  -2        867.42        850.56       105.52 o
   3  13  -2        119.72         22.01        32.87 o
   4  13  -2        865.07        997.55       175.47 o
   5  13  -2         26.03        -42.34        65.06 o
   6  13  -2         53.13        -24.74        54.60 o
   7  13  -2          9.28         63.89        63.89 o
   8  13  -2       1377.90       1405.83       221.57 o
   9  13  -2        386.62        303.06        83.30 o
  10  13  -2       1069.47       1180.06       138.47 o
  11  13  -2        470.96        568.10        80.77 o
  12  13  -2        620.53        690.05       150.63 o
  13  13  -2         16.41         26.23        48.08 o
   0  14  -2        578.48        705.48       136.87 o
   1  14  -2        385.01        215.11        38.06 o
   2  14  -2         11.39         -8.85        19.43 o
   3  14  -2        387.50        431.66       107.10 o
   4  14  -2       1318.11       1272.95       202.75 o
   5  14  -2       1405.96       1410.90       226.04 o
   6  14  -2        235.28        389.18       168.45 o
   7  14  -2        143.31        123.14        70.28 o
   8  14  -2        212.26         95.97       172.51 o
   9  14  -2        129.70        107.60        34.58 o
  10  14  -2        166.99        187.53        95.84 o
  11  14  -2        284.15        328.77        94.10 o
   0  15  -2        162.83        103.24        27.88 o
   1  15  -2       1128.97       1084.95       116.71 o
   2  15  -2        125.97        151.89        39.53 o
   3  15  -2        213.88        299.72        70.86 o
   4  15  -2        127.08        226.63        45.20 o
   5  15  -2         18.62        198.65        59.25 o
   6  15  -2        382.69        296.03        75.55 o
   7  15  -2         63.33        138.02        34.03 o
   8  15  -2         24.50         21.25        30.60 o
   0  16  -2        692.05        674.96       178.90 o
   1  16  -2        271.73        397.31        69.70 o
   2  16  -2         16.04        -31.31        31.31 o
   3  16  -2        328.71        527.42       105.72 o
   4  16  -2        372.43        191.68        52.28 o
   2   0  -1      26734.85      27228.38       308.68 o
   4   0  -1       3191.29       3143.16        65.00 o
   6   0  -1      22142.44      21773.64       216.15 o
   8   0  -1       8053.16       8496.64       194.10 o
  10   0  -1          1.86        -14.91        14.91 o
  12   0  -1       4655.14       4168.65       163.87 o
  14   0  -1       2584.29       2666.46       253.75 o
  16   0  -1       1811.03       2103.93       131.49 o
  18   0  -1        579.58        505.35        77.84 o
  20   0  -1        151.91        200.98        44.15 o
   1   1  -1       3078.13       2579.65        33.12 o
   2   1  -1       2807.41       2797.83        44.16 o
   3   1  -1      26930.71      28955.26       179.85 o
   4   1  -1      10973.25      11138.40       101.62 o
   5   1  -1       7528.05       7659.79        89.47 o
   6   1  -1        307.35        287.54        24.46 o
   7   1  -1      13027.12      12196.68       132.19 o
   8   1  -1       2183.03       2041.87        53.24 o
   9   1  -1       1720.57       1695.17        52.11 o
  10   1  -1        877.14        906.18        46.56 o
  11   1  -1       1488.72       1582.51        61.24 o
  12   1  -1        538.49        545.70        46.71 o
  13   1  -1       4736.10       4637.73       120.15 o
  14   1  -1        269.11        298.24        42.14 o
  15   1  -1        165.73        166.09        30.78 o
  16   1  -1       1024.89       1165.10        81.14 o
  17   1  -1       2194.39       2459.42       115.88 o
  18   1  -1        864.02        878.67        78.45 o
  19   1  -1        634.29        611.63        70.28 o
  20   1  -1        210.70        226.06        54.02 o
  21   1  -1        154.16         99.91        26.72 o
   1   2  -1      29757.04      30709.01       248.37 o
   2   2  -1      15494.46      16664.71       127.38 o
   3   2  -1      10702.02      10990.39       164.49 o
   4   2  -1      12916.17      12892.64       173.55 o
   5   2  -1       5006.04       5111.67        85.05 o
   6   2  -1       2143.90       2204.03        59.34 o
   7   2  -1       1041.23        984.96        39.33 o
   8   2  -1       2246.06       2230.46        60.10 o
   9   2  -1       1761.69       1701.84        56.22 o
  10   2  -1       2379.63       2357.05        68.92 o
  11   2  -1        515.22        582.38        41.69 o
  12   2  -1       2212.58       2030.84        71.60 o
  13   2  -1       1668.48       1710.06        77.48 o
  14   2  -1        755.11        731.37        63.00 o
  15   2  -1        242.18        157.80        37.43 o
  16   2  -1        929.68        904.55        69.35 o
  17   2  -1       1230.88       1207.34        82.64 o
  18   2  -1        949.93        932.68        75.56 o
  19   2  -1        426.74        579.56        69.73 o
  20   2  -1        129.56        135.14        63.31 o
  21   2  -1        344.00        323.64        50.91 o
   1   3  -1       1463.32       1478.08        52.46 o
   2   3  -1       5934.36       5504.27        82.09 o
   3   3  -1      11361.05      11875.96       158.27 o
   4   3  -1       2107.73       2472.56        71.07 o
   5   3  -1       5642.74       5489.33       201.61 o
   6   3  -1       2526.80       2374.43        64.47 o
   7   3  -1        393.13        323.75        25.44 o
   8   3  -1      14325.74      14009.42       176.70 o
   9   3  -1       1106.32       1065.45        40.14 o
  10   3  -1        954.86        942.73        40.08 o
  11   3  -1        249.17        192.57        24.20 o
  12   3  -1       8328.15       8254.38       142.85 o
  13   3  -1        258.25        201.74        47.34 o
  14   3  -1        426.76        491.61        64.36 o
  15   3  -1          2.37        -11.70        21.45 o
  16   3  -1        330.99        352.84        52.60 o
  17   3  -1        152.00        153.27        41.10 o
  18   3  -1       1458.94       1386.11       116.92 o
  19   3  -1         57.05        -31.37        31.37 o
  20   3  -1        160.85        163.80        41.82 o
  21   3  -1         16.88        -25.56        25.56 o
   1   4  -1      10144.42       9806.50       151.11 o
   2   4  -1       9230.19       9283.25       133.14 o
   3   4  -1      17094.77      16093.35       376.14 o
   4   4  -1       5258.64       5539.34       122.21 o
   5   4  -1       1280.71       1289.66        49.30 o
   6   4  -1        847.16       1054.23        48.98 o
   7   4  -1       3137.80       2996.84        81.88 o
   8   4  -1       1693.90       1724.98        62.09 o
   9   4  -1       1112.07        956.91        49.66 o
  10   4  -1        371.39        377.49        29.35 o
  11   4  -1       4488.92       4342.43       109.41 o
  12   4  -1        177.53        207.32        39.08 o
  13   4  -1        526.44        517.08        49.72 o
  14   4  -1        126.64         67.35        41.88 o
  15   4  -1        612.33        599.75        89.34 o
  16   4  -1          4.94         30.05        33.99 o
  17   4  -1       1310.76       1330.05       110.10 o
  18   4  -1        279.92        185.75        35.35 o
  19   4  -1        356.53        226.53        76.67 o
  20   4  -1        130.32        104.77        36.01 o
  21   4  -1        330.94        358.97        51.12 o
   1   5  -1        688.20        696.87        44.55 o
   2   5  -1       4709.52       4757.77       105.34 o
   3   5  -1       5643.95       5674.52       113.93 o
   4   5  -1       2453.44       2466.76        90.31 o
   5   5  -1       4693.91       4931.32       106.55 o
   6   5  -1       1746.01       1767.74        63.07 o
   7   5  -1       3877.52       3497.30        96.65 o
   8   5  -1      10046.72       9670.80       164.74 o
   9   5  -1        908.44        886.54        50.69 o
  10   5  -1        226.59        218.05        38.91 o
  11   5  -1        481.00        499.24        48.41 o
  12   5  -1       3542.64       3706.66       143.60 o
  13   5  -1        479.64        501.80        91.54 o
  14   5  -1        323.73        311.03        70.34 o
  15   5  -1         17.27         97.58        60.41 o
  16   5  -1         71.14         37.18        69.55 o
  17   5  -1        298.38        320.73        55.61 o
  18   5  -1       1198.16       1324.21       112.22 o
  19   5  -1        154.39        130.91        29.97 o
  20   5  -1        257.12        195.17        51.12 o
   1   6  -1       4773.03       4828.03       117.51 o
   2   6  -1       3020.07       2631.09        99.52 o
   3   6  -1       1629.51       1552.63        65.59 o
   4   6  -1       3759.18       3710.63       117.15 o
   5   6  -1       2607.46       2787.61        86.88 o
   6   6  -1       7278.41       7238.51       141.26 o
   7   6  -1       2607.98       2588.66        83.36 o
   8   6  -1        870.14        827.67        51.94 o
   9   6  -1       2037.56       1986.45        91.07 o
  10   6  -1        261.84        289.03        51.48 o
  11   6  -1        473.28        423.95        93.13 o
  12   6  -1        745.01        852.20       121.33 o
  13   6  -1        826.44        909.64       125.23 o
  14   6  -1        361.24        370.99       103.87 o
  15   6  -1          4.75         32.66        33.98 o
  16   6  -1        332.00        388.28        75.67 o
  17   6  -1        741.64        799.84        88.78 o
  18   6  -1        240.68        260.21        76.18 o
  19   6  -1         57.30         35.61        23.32 o
  20   6  -1         21.45         83.64        38.34 o
   1   7  -1        247.37        296.82        40.05 o
   2   7  -1        776.52        686.89        59.35 o
   3   7  -1       5314.51       5152.85       129.47 o
   4   7  -1        624.67        559.21        45.32 o
   5   7  -1        484.21        443.82        51.19 o
   6   7  -1        197.32        251.74        38.72 o
   7   7  -1       2754.31       2584.85        96.82 o
   8   7  -1       2501.25       2600.92        96.73 o
   9   7  -1        274.21        347.10        39.92 o
  10   7  -1       1408.91       1535.64       146.34 o
  11   7  -1         34.54         88.34        49.18 o
  12   7  -1        860.28        912.75       128.94 o
  13   7  -1       3947.80       3798.50       210.62 o
  14   7  -1        147.14        166.82        58.42 o
  15   7  -1        116.76        153.45        42.67 o
  16   7  -1         60.11        121.87        35.35 o
  17   7  -1       1111.15       1225.83       126.75 o
  19   7  -1         85.97         29.26        22.86 o
   1   8  -1        377.38        348.21        48.70 o
   2   8  -1       4119.60       4196.09       125.49 o
   3   8  -1        868.01        859.45        58.06 o
   4   8  -1       2988.21       3001.56       116.87 o
   5   8  -1       2001.62       1869.36       117.41 o
   6   8  -1       4103.02       4264.29       137.32 o
   7   8  -1        138.41        140.10        29.77 o
   8   8  -1         86.02        129.79        29.60 o
   9   8  -1        427.80        310.56        84.93 o
  10   8  -1         83.98        126.82        56.98 o
  11   8  -1       1193.90       1286.52       138.44 o
  12   8  -1       3655.81       4003.46       221.26 o
  13   8  -1        228.58        201.82        63.63 o
  14   8  -1        992.38       1191.57       136.09 o
  15   8  -1         13.92         49.44        25.34 o
  16   8  -1       1235.10       1135.43       145.17 o
  17   8  -1          0.39         84.33        23.19 o
  18   8  -1         32.50         26.76        30.69 o
  19   8  -1         57.23         37.23        50.12 o
   1   9  -1        503.30        451.27        56.65 o
   2   9  -1        235.61        279.17        47.95 o
   3   9  -1       3136.88       2805.42       134.48 o
   4   9  -1         21.93        -14.41        19.91 o
   5   9  -1        516.73        573.68        86.36 o
   6   9  -1       2807.52       2764.04       116.44 o
   7   9  -1       3925.40       3909.76       136.20 o
   8   9  -1       1225.71       1278.46       142.02 o
   9   9  -1        562.61        689.25       118.17 o
  10   9  -1        205.82        131.85        56.27 o
  11   9  -1        391.80        477.78       100.28 o
  12   9  -1        262.70        229.99        70.00 o
  13   9  -1       3390.49       3704.61       220.80 o
  14   9  -1        206.06        220.35        52.40 o
  15   9  -1        268.48        271.65        48.90 o
  16   9  -1         36.46         -9.02        28.65 o
  17   9  -1        315.87        274.60        64.79 o
  18   9  -1         47.17         73.73        62.15 o
   1  10  -1       1517.12       1698.62        98.78 o
   2  10  -1       1370.28       1629.46       107.34 o
   3  10  -1       1313.55       1300.84        98.58 o
   4  10  -1       3814.59       3550.37       142.09 o
   5  10  -1        651.72        754.08       101.00 o
   6  10  -1       1113.53       1055.61        83.15 o
   7  10  -1       2677.82       2857.82       188.06 o
   8  10  -1         33.13        -16.06        24.97 o
   9  10  -1        454.81        542.73       106.37 o
  10  10  -1        447.29        408.00        89.62 o
  11  10  -1        131.37        125.67        53.58 o
  12  10  -1        245.66        233.27        66.76 o
  13  10  -1        277.73        288.59        89.70 o
  14  10  -1        254.31        242.63        97.79 o
  15  10  -1         53.27        166.16        54.60 o
  16  10  -1        651.48        690.61       112.26 o
  17  10  -1        133.15         49.13        24.78 o
   1  11  -1         60.43         45.21        18.99 o
   2  11  -1       1560.52       1729.51       119.27 o
   3  11  -1       2387.95       2364.09       117.51 o
   4  11  -1       1116.50       1151.82       102.12 o
   5  11  -1         88.87         36.22        20.58 o
   6  11  -1         96.54        -14.05        29.85 o
   7  11  -1         36.45         48.68        32.31 o
   8  11  -1       1248.20       1339.09       170.34 o
   9  11  -1         63.96         52.86        73.77 o
  10  11  -1        246.98        222.05        44.73 o
  11  11  -1         54.21         98.28        29.08 o
  12  11  -1       1355.56       1599.63       166.06 o
  13  11  -1        603.53        622.71       112.21 o
  14  11  -1         37.48        114.20        25.70 o
  15  11  -1        116.33        134.47        62.64 o
  16  11  -1        220.45        413.57        80.16 o
   1  12  -1       1047.24       1118.36       106.44 o
   2  12  -1        471.67        465.13        71.91 o
   3  12  -1       3738.08       4133.74       185.12 o
   4  12  -1        330.97        341.35        66.90 o
   5  12  -1         15.99         58.92        28.38 o
   6  12  -1        218.75        220.71        43.20 o
   7  12  -1        761.34        736.96       119.56 o
   8  12  -1        448.10        331.08        74.68 o
   9  12  -1        287.65        269.47        62.55 o
  10  12  -1         35.80        137.60        46.12 o
  11  12  -1        874.19       1272.06       137.00 o
  12  12  -1          1.21        -10.21        27.44 o
  13  12  -1        147.04        324.38        75.42 o
  14  12  -1         18.33         -0.73        42.61 o
   1  13  -1        480.80        492.46        76.53 o
   2  13  -1       2168.39       2249.24       136.92 o
   3  13  -1        528.50        579.33        77.90 o
   4  13  -1        584.52        483.79        90.62 o
   5  13  -1        161.80        173.00        61.08 o
   6  13  -1        143.43        102.23        47.64 o
   7  13  -1        245.43        211.14        73.77 o
   8  13  -1        710.10        684.75       150.32 o
   9  13  -1         85.63         84.24        34.85 o
  10  13  -1        183.98        187.86        30.95 o
  11  13  -1        248.08        320.62       138.00 o
  12  13  -1        892.58       1311.60       134.46 o
  13  13  -1        233.39        109.37        65.06 o
   1  14  -1        845.79        941.30       109.71 o
   2  14  -1       1266.05       1310.63       158.22 o
   3  14  -1        502.79        637.07       121.41 o
   4  14  -1        817.59        765.98       152.41 o
   5  14  -1        228.83        163.82        55.51 o
   6  14  -1        151.23         32.05       102.81 o
   7  14  -1        144.22        279.25        64.97 o
   8  14  -1        118.38         59.73        42.67 o
   9  14  -1        131.49        164.96        73.19 o
  10  14  -1        165.74        245.90        63.40 o
  11  14  -1        190.53         67.58        39.97 o
   1  15  -1         37.40         61.64        23.52 o
   2  15  -1         99.64        126.78        24.64 o
   3  15  -1        898.99        997.18       166.73 o
   4  15  -1         59.08        182.39        55.76 o
   5  15  -1         70.29         93.05        34.04 o
   6  15  -1         10.29         10.63        90.61 o
   7  15  -1        528.37        472.13       110.88 o
   8  15  -1        290.20        293.54        83.60 o
   1  16  -1        166.10         32.70        30.13 o
   2  16  -1        254.49        137.08        51.12 o
   3  16  -1          5.86        -31.49        31.49 o
   4  16  -1        894.14       1038.92       130.31 o
   2   0   0       2318.82       1853.57        47.10 o
   4   0   0       6717.59       7049.47       109.60 o
   6   0   0       2570.76       2511.83        79.72 o
   8   0   0        700.79        616.89        55.94 o
  10   0   0       2487.99       2147.13        93.85 o
  12   0   0       1827.62       1737.51        90.58 o
  14   0   0        206.75        221.19        47.63 o
  16   0   0       6793.67       6667.25       231.76 o
  18   0   0          3.54         58.09        24.40 o
  20   0   0       4146.68       4350.63       247.45 o
  22   0   0        112.16        149.86        27.88 o
   0   1   0       3230.70       2555.51        60.82 o
   1   1   0       9712.96       9618.92        95.97 o
   2   1   0        152.98        132.41         9.36 o
   3   1   0       4073.32       4103.05        51.71 o
   4   1   0      14771.47      14909.21       123.76 o
   5   1   0        775.89        735.70        30.57 o
   6   1   0      23866.34      23621.90       264.68 o
   7   1   0      16357.81      15870.41       147.96 o
   8   1   0        235.54        282.25        26.97 o
   9   1   0       6229.61       6251.20       100.89 o
  10   1   0       2833.11       2824.07        72.17 o
  11   1   0        388.97        313.63        33.64 o
  12   1   0          9.02         36.75        17.22 o
  13   1   0       4480.95       4446.12       104.33 o
  14   1   0       2329.14       2408.20        88.25 o
  15   1   0       2946.09       2929.86       104.92 o
  16   1   0       5061.70       5030.69       142.08 o
  17   1   0       1651.50       1858.08        95.43 o
  18   1   0        473.13        506.47        98.02 o
  19   1   0       2478.55       2671.72       134.35 o
  20   1   0        354.53        478.38        55.18 o
  21   1   0        133.49        225.37        31.37 o
   0   2   0         18.97         30.18        11.09 o
   1   2   0      19235.65      20226.87       270.21 o
   2   2   0      29682.70      31651.55       362.51 o
   3   2   0       7293.58       7258.76        84.67 o
   4   2   0       1697.09       1628.77        41.05 o
   5   2   0       7755.69       7852.02        87.20 o
   6   2   0          9.61         12.78         8.98 o
   7   2   0       1970.41       1828.42        51.34 o
   8   2   0       2403.72       2505.38        62.81 o
   9   2   0        164.01         87.59        18.05 o
  10   2   0       4483.22       4129.05        90.58 o
  11   2   0       6336.63       6241.18       116.71 o
  12   2   0       2092.63       1969.45        70.35 o
  13   2   0        390.81        284.30        40.93 o
  14   2   0          9.15        -14.61        14.61 o
  15   2   0        562.76        588.29        64.03 o
  16   2   0       1684.65       1518.74        84.76 o
  17   2   0          4.06         -4.09        26.69 o
  18   2   0        225.30        276.58        39.67 o
  19   2   0        460.60        300.91        80.77 o
  20   2   0        201.14        231.43        36.83 o
  21   2   0        399.84        313.66        68.54 o
   0   3   0      31626.99      32412.97      1038.89 o
   1   3   0       1202.16       1315.65        46.02 o
   2   3   0      25740.32      26932.47       224.73 o
   3   3   0       3101.91       3078.40        59.27 o
   4   3   0       3570.70       3390.56        67.51 o
   5   3   0        564.90        633.08        30.99 o
   6   3   0      11973.85      11471.68       135.07 o
   7   3   0       1323.65       1360.33        46.73 o
   8   3   0       2117.39       2034.74        66.20 o
   9   3   0       8965.27       9120.73       149.81 o
  10   3   0         62.41         44.21        12.08 o
  11   3   0       2204.59       2302.46        75.16 o
  12   3   0         96.19        128.80        31.45 o
  13   3   0          3.05         15.59        22.37 o
  14   3   0       7463.22       7252.81       184.82 o
  15   3   0          6.87         44.96        35.07 o
  16   3   0       1091.84       1103.46        81.39 o
  17   3   0          2.45          6.46        35.75 o
  18   3   0        129.65         97.58        27.88 o
  19   3   0        377.22        453.88        78.03 o
  20   3   0        165.04        197.49        46.47 o
  21   3   0          7.57         47.63        24.40 o
   0   4   0      10986.18      11069.20       210.16 o
   1   4   0       5065.39       4718.10       103.33 o
   2   4   0       1381.55       1311.44        58.99 o
   3   4   0       2466.38       2465.98        61.20 o
   4   4   0      32996.18      33679.40       388.96 o
   5   4   0       4196.84       4035.48        84.31 o
   6   4   0       1757.46       1653.18        54.05 o
   7   4   0         68.59         89.21        17.05 o
   8   4   0        111.98        112.82        17.75 o
   9   4   0       5480.48       5292.82       115.65 o
  10   4   0        150.72        204.40        47.97 o
  11   4   0       1562.79       1493.63        75.47 o
  12   4   0        290.72        380.83        54.89 o
  13   4   0       1118.29       1371.30       121.20 o
  14   4   0        212.26        209.46        57.53 o
  15   4   0       1018.18       1259.74       120.19 o
  16   4   0         22.68         52.62        23.95 o
  17   4   0        165.72        225.11        49.98 o
  18   4   0         18.03         44.45        37.76 o
  19   4   0        101.87         15.74        24.98 o
  20   4   0        169.81        357.81        52.28 o
  21   4   0        698.80        772.54        92.94 o
   0   5   0        187.44        320.05        51.68 o
   1   5   0        919.10        876.14        52.64 o
   2   5   0       7608.07       7431.08       131.78 o
   3   5   0       3409.16       2948.02        96.84 o
   4   5   0       1479.84       1640.53        55.08 o
   5   5   0        451.62        386.20        32.13 o
   6   5   0       2709.78       2439.62        71.95 o
   7   5   0       1302.57       1411.49        54.92 o
   8   5   0         12.39         -0.62        15.76 o
   9   5   0        257.48        251.23        26.19 o
  10   5   0      12403.64      12338.82       194.03 o
  11   5   0         15.85         25.97        36.94 o
  12   5   0       7110.69       6810.74       247.14 o
  13   5   0       1571.92       1341.55       126.93 o
  14   5   0        283.20        172.61        57.92 o
  15   5   0        150.49         83.63        40.80 o
  16   5   0          4.93        -22.29        22.29 o
  17   5   0         74.96         93.57        27.74 o
  18   5   0       1237.71       1356.52       112.26 o
  19   5   0        113.87         41.78        34.85 o
  20   5   0        942.92       1199.74       118.96 o
   0   6   0      13124.83      12830.79       274.27 o
   1   6   0       1851.44       2110.49        84.40 o
   2   6   0       2279.45       2270.90        80.13 o
   3   6   0      21771.53      21850.71       297.57 o
   4   6   0       4117.16       4007.52       102.96 o
   5   6   0       3578.04       3477.20        95.72 o
   6   6   0        124.23        256.76        29.19 o
   7   6   0       3471.87       3399.95        92.70 o
   8   6   0        180.31        184.18        24.01 o
   9   6   0        711.54        736.67        47.04 o
  10   6   0       1090.08        942.36        73.57 o
  11   6   0       1942.92       1988.69       149.28 o
  12   6   0       1301.21       1195.80       141.91 o
  13   6   0          4.68        -26.67        26.67 o
  14   6   0        260.31        299.93        74.96 o
  15   6   0       2847.12       3145.27       182.34 o
  16   6   0       1390.25       1389.26       133.09 o
  17   6   0        114.65         96.86        38.17 o
  18   6   0         86.96         28.42        42.02 o
  19   6   0          7.88         97.41        39.50 o
  20   6   0          4.70        -40.66        40.66 o
   0   7   0       1308.47       1313.42        95.23 o
   1   7   0       2422.60       2251.93        86.10 o
   2   7   0        513.82        595.87        54.92 o
   3   7   0         22.22         72.19        17.86 o
   4   7   0        278.11        413.03        37.83 o
   5   7   0       2277.40       2335.13        83.81 o
   6   7   0        296.61        316.20        41.99 o
   7   7   0       2894.45       2828.56        99.50 o
   8   7   0        166.86        156.06        22.93 o
   9   7   0      11943.19      11858.83       344.68 o
  10   7   0       1328.52       1332.58       150.95 o
  11   7   0       5381.12       5722.49       249.18 o
  12   7   0        359.37        411.72        89.25 o
  13   7   0        465.77        371.68        80.29 o
  14   7   0       1728.99       1869.77       153.05 o
  15   7   0        217.61        225.31        56.11 o
  16   7   0          6.48          2.68        22.37 o
  17   7   0        118.90        148.68        39.44 o
  18   7   0         13.95         -2.77        44.47 o
  19   7   0       1263.69       1343.98       106.31 o
   0   8   0      15690.11      15719.37       350.54 o
   1   8   0        247.37        245.89        39.53 o
   2   8   0       1723.49       1636.89        86.69 o
   3   8   0        964.39        847.82        59.16 o
   4   8   0       1049.90        967.62        80.22 o
   5   8   0        725.34        768.50        64.59 o
   6   8   0       2869.74       2866.65       110.06 o
   7   8   0        759.69        773.27        58.57 o
   8   8   0        132.02        153.80        45.45 o
   9   8   0         26.97        -15.84        35.22 o
  10   8   0       3051.93       3355.33       201.18 o
  11   8   0       1381.69       1436.00       167.37 o
  12   8   0        169.85        191.44        64.73 o
  13   8   0          7.40         52.58        44.48 o
  14   8   0        173.60        314.93        77.98 o
  15   8   0        101.90        113.94        47.62 o
  16   8   0       1923.99       2323.90       163.76 o
  17   8   0          8.83         95.94        26.32 o
  18   8   0         11.21         17.71        41.55 o
  19   8   0         11.20        -18.98        25.02 o
   0   9   0       1125.71       1077.37        99.10 o
   1   9   0       4292.40       4476.14       137.48 o
   2   9   0        830.83        790.95        65.82 o
   3   9   0         86.33        115.09        36.81 o
   4   9   0        199.67        319.86        67.28 o
   5   9   0        289.64        252.59        45.91 o
   6   9   0         29.26         18.12        19.12 o
   7   9   0        189.41        207.63        55.00 o
   8   9   0       3284.19       3324.97       201.91 o
   9   9   0       1503.36       1830.00       166.76 o
  10   9   0        246.97        111.54        54.83 o
  11   9   0        716.22        526.82       102.32 o
  12   9   0        206.43        100.30        45.66 o
  13   9   0       1435.53       1511.09       154.76 o
  14   9   0          1.93        130.81        35.46 o
  15   9   0        209.47        369.91        87.41 o
  16   9   0        271.09        306.48        60.66 o
  17   9   0         32.91          3.71        33.63 o
  18   9   0         65.35         81.22        23.55 o
   0  10   0       7446.71       7332.78       267.15 o
   1  10   0        319.65        312.29        54.27 o
   2  10   0        542.51        488.28        69.03 o
   3  10   0       2000.59       2146.65       128.28 o
   4  10   0         30.51         49.21        24.47 o
   5  10   0       5056.07       5448.83       173.60 o
   6  10   0       1167.06       1296.72       113.32 o
   7  10   0        208.43        120.75        34.45 o
   8  10   0       1835.36       1825.45       154.13 o
   9  10   0        129.79        140.09        57.36 o
  10  10   0       1152.03       1355.87       174.34 o
  11  10   0        335.85        403.73        87.98 o
  12  10   0        103.50         80.18        27.16 o
  13  10   0          3.33         13.33        29.87 o
  14  10   0         82.31        317.54        82.04 o
  15  10   0        238.97        221.00        48.35 o
  16  10   0        355.67        266.99        65.82 o
  17  10   0         24.32        -20.84        26.13 o
   0  11   0        411.07        542.88       111.64 o
   1  11   0        369.12        324.30        62.38 o
   2  11   0          9.52         40.96        19.33 o
   3  11   0       1052.93        949.08        78.03 o
   4  11   0       4309.72       3849.08       254.79 o
   5  11   0        221.54        318.18        68.38 o
   6  11   0        545.23        620.11        89.59 o
   7  11   0       3435.81       3931.92       226.30 o
   8  11   0         14.73        -25.09        25.09 o
   9  11   0         29.26          2.02        49.09 o
  10  11   0        537.50        759.52       124.24 o
  11  11   0          2.73         39.51        30.12 o
  12  11   0       1075.15       1269.24       133.49 o
  13  11   0       1109.40       1203.69       210.33 o
  14  11   0       1375.72       1255.56       164.73 o
  15  11   0        667.56        760.46       106.79 o
  16  11   0        351.24        383.94        71.82 o
   0  12   0         74.27        109.91        45.65 o
   1  12   0       5212.05       5242.49       208.29 o
   2  12   0        129.78        136.47        34.28 o
   3  12   0        416.60        473.24        67.58 o
   4  12   0         10.81        -16.40        21.86 o
   5  12   0       1427.34       1463.05       114.89 o
   6  12   0        614.16        771.44       124.84 o
   7  12   0        467.54        700.90       115.88 o
   8  12   0         52.39         58.70        24.90 o
   9  12   0        789.68        769.47       129.84 o
  10  12   0        124.13        104.96        42.62 o
  11  12   0       1667.27       1914.71       183.35 o
  12  12   0         34.58        165.02        46.47 o
  13  12   0        280.21        249.40        66.29 o
  14  12   0         16.02         60.54        31.25 o
   0  13   0        648.97        840.74       149.13 o
   1  13   0        611.08        734.88        93.38 o
   2  13   0        579.51        676.30        90.17 o
   3  13   0          2.44         30.76        26.43 o
   4  13   0       4147.78       4628.02       251.18 o
   5  13   0        308.44        431.91       106.19 o
   6  13   0       1013.90       1030.89       185.97 o
   7  13   0         55.38         -4.62        23.82 o
   8  13   0         46.02         11.16        23.83 o
   9  13   0         14.51         93.16        92.94 o
  10  13   0         46.77         74.95        26.21 o
  11  13   0          1.19         66.85        34.63 o
  12  13   0         74.83        213.84        39.36 o
  13  13   0         41.15        172.49        30.61 o
   0  14   0       1553.08       1535.13       162.50 o
   1  14   0       1194.66       1306.49       118.72 o
   2  14   0         31.86         54.08        36.81 o
   3  14   0        347.74        469.50        87.54 o
   4  14   0          6.90         69.70        52.28 o
   5  14   0        264.86        269.74        84.22 o
   6  14   0         56.46        -26.41        38.34 o
   7  14   0         22.78          7.32        30.25 o
   8  14   0        882.72        829.24       171.07 o
   9  14   0        210.68        204.84        54.81 o
  10  14   0       1355.58       1458.24       239.19 o
  11  14   0         97.35         -6.35        52.86 o
   0  15   0        155.21          0.00        51.12 o
   1  15   0        299.35        242.27       108.56 o
   2  15   0        320.95        214.23        64.46 o
   3  15   0        315.07        442.40        90.55 o
   4  15   0          3.07         40.12        63.31 o
   5  15   0        417.99        505.61       111.65 o
   6  15   0          1.53        -30.77        30.77 o
   7  15   0       1183.22       1170.69       204.85 o
   8  15   0        206.61        219.14        52.28 o
   0  16   0       1006.02        924.73       194.01 o
   1  16   0          6.36        118.95        87.71 o
   2  16   0         59.95          5.82       121.40 o
   3  16   0         21.58        156.83        67.38 o
   4  16   0         55.46        171.93        76.67 o
   4   0   1       2599.83       2965.86       132.44 o
   6   0   1      22959.80      22297.24       221.65 o
   8   0   1       9709.06       8916.52       150.52 o
  10   0   1          1.93         -5.88        16.64 o
  12   0   1       4247.82       4169.13       127.82 o
  14   0   1       2750.04       2860.31       115.87 o
  16   0   1       1909.52       2067.00       119.78 o
  18   0   1        326.66        342.71        69.70 o
  20   0   1        136.18        138.24        32.53 o
   1   1   1       3460.95       2654.81        49.91 o
   2   1   1       2640.58       2698.68        49.78 o
   3   1   1      28630.00      29649.20       338.08 o
   4   1   1      11401.36      11397.01       113.57 o
   5   1   1       7569.64       7666.45       101.19 o
   6   1   1        274.50        295.52        27.49 o
   7   1   1      12164.02      12057.38       120.71 o
   8   1   1       1834.15       1927.91        50.20 o
   9   1   1       1515.06       1653.84        51.77 o
  10   1   1        901.81        880.11        41.36 o
  11   1   1       1693.18       1578.03        58.53 o
  12   1   1        532.78        542.40        43.21 o
  13   1   1       4907.28       4768.71       102.32 o
  14   1   1        221.23        232.02        31.74 o
  15   1   1        176.87        151.38        29.59 o
  16   1   1       1142.66       1070.31        66.90 o
  17   1   1       2272.69       2349.88       102.24 o
  18   1   1        737.08        836.99        59.92 o
  19   1   1        696.26        656.15        56.61 o
  20   1   1        207.16        271.09        30.03 o
  21   1   1        160.16        158.98        23.15 o
   1   2   1      29318.44      30694.36       317.87 o
   2   2   1      17308.45      17162.05       183.95 o
   3   2   1      12003.42      11461.61        93.45 o
   4   2   1      12711.12      12939.13       116.45 o
   5   2   1       4995.16       5231.89        73.56 o
   6   2   1       2137.66       2112.70        44.19 o
   7   2   1        728.13        916.66        37.02 o
   8   2   1       2107.35       2179.89        55.71 o
   9   2   1       1892.31       1668.38        60.99 o
  10   2   1       2402.22       2267.32        72.83 o
  11   2   1        661.42        567.13        47.73 o
  12   2   1       2199.06       2101.45        71.23 o
  13   2   1       1735.82       1710.75        67.04 o
  14   2   1        664.90        809.49        58.56 o
  15   2   1        232.78        188.95        31.16 o
  16   2   1        862.91        893.45        64.73 o
  17   2   1       1199.44       1208.45        76.24 o
  18   2   1       1065.98        864.49        64.87 o
  19   2   1        471.80        496.36        43.46 o
  20   2   1        137.43        120.26        23.40 o
  21   2   1        295.53        354.32        41.82 o
   1   3   1       1444.10       1444.65        50.31 o
   2   3   1       4488.36       5131.45        77.85 o
   3   3   1      11917.60      12107.01       118.36 o
   4   3   1       2329.24       2487.60        52.67 o
   5   3   1       5648.07       5825.09        84.66 o
   6   3   1       2047.46       2214.79        54.69 o
   7   3   1        314.16        283.62        23.65 o
   8   3   1      14180.61      13731.36       158.38 o
   9   3   1       1046.23       1043.52        54.04 o
  10   3   1        908.24        930.86        69.25 o
  11   3   1        197.28        153.09        29.92 o
  12   3   1       8580.19       8508.40       201.94 o
  13   3   1        263.91        297.47        51.17 o
  14   3   1        565.69        556.39        66.16 o
  15   3   1          4.14          1.32        34.08 o
  16   3   1        359.78        386.59        67.12 o
  17   3   1        173.28        211.14        55.41 o
  18   3   1       1494.15       1496.38       117.79 o
  19   3   1         41.66        -14.13        55.76 o
  20   3   1        164.63        151.91        25.87 o
  21   3   1         30.61         18.59        23.23 o
   1   4   1      10155.86       9648.41       136.71 o
   2   4   1       9236.71       9370.40       122.77 o
   3   4   1      15598.55      16485.34       164.70 o
   4   4   1       5269.45       5548.17        88.79 o
   5   4   1       1273.31       1245.46        43.83 o
   6   4   1        859.29       1057.56        42.02 o
   7   4   1       3324.19       3047.92        70.67 o
   8   4   1       1685.30       1748.27        55.72 o
   9   4   1        863.18        929.11        43.47 o
  10   4   1        369.17        298.48        38.95 o
  11   4   1       4507.83       4313.96       147.92 o
  12   4   1        177.57        179.86        58.50 o
  13   4   1        396.72        617.25        97.04 o
  14   4   1        127.84         53.03        82.24 o
  15   4   1        631.73        600.95        87.20 o
  16   4   1          5.63        -11.73        16.91 o
  17   4   1       1454.27       1376.77       106.41 o
  18   4   1        280.87        216.27        66.80 o
  19   4   1        374.60        293.91        61.57 o
  20   4   1        130.53        198.41        34.27 o
  21   4   1        297.38        383.73       101.07 o
   1   5   1        796.33        777.54        43.75 o
   2   5   1       5112.90       4862.24       125.43 o
   3   5   1       5955.67       5843.41       105.86 o
   4   5   1       2510.16       2569.34        67.88 o
   5   5   1       4675.03       4994.68       100.67 o
   6   5   1       1818.68       1754.22        57.53 o
   7   5   1       3474.84       3528.94        82.02 o
   8   5   1       9766.18       9575.84       141.91 o
   9   5   1        808.85        844.55        40.99 o
  10   5   1        206.33        199.69        16.89 o
  11   5   1        491.75        509.73        92.17 o
  12   5   1       3854.73       3863.53       188.11 o
  13   5   1        367.60        519.35       111.39 o
  14   5   1        352.51        396.33       103.73 o
  15   5   1         16.45         96.41        35.26 o
  16   5   1         52.55          7.31        35.79 o
  17   5   1        320.75        421.90        70.71 o
  18   5   1       1286.05       1290.74       110.01 o
  19   5   1        176.63        227.55        64.48 o
  20   5   1        246.31        265.82        43.56 o
   1   6   1       4853.04       4957.64       129.28 o
   2   6   1       2693.95       2763.61       104.99 o
   3   6   1       1166.06       1402.52        62.37 o
   4   6   1       3553.89       3735.67        91.57 o
   5   6   1       2582.34       2696.47        75.45 o
   6   6   1       7014.21       7207.97       132.23 o
   7   6   1       2757.18       2670.19        77.80 o
   8   6   1        772.88        861.66        42.19 o
   9   6   1       2060.35       1998.65        71.60 o
  10   6   1        263.56        278.08        45.65 o
  11   6   1        369.17        480.14        93.34 o
  12   6   1        847.14        803.66       121.84 o
  13   6   1        955.70        926.62       126.26 o
  14   6   1        336.23        284.62        68.88 o
  15   6   1          3.13         39.21        29.65 o
  16   6   1        262.97        260.52        58.87 o
  17   6   1        692.16        691.89       115.69 o
  18   6   1        365.40        227.37        52.37 o
  19   6   1         39.70         64.34        22.89 o
  20   6   1         24.20         89.45        23.85 o
   1   7   1        178.56        205.62        34.38 o
   2   7   1        577.55        672.26        54.36 o
   3   7   1       5565.41       4951.47       142.80 o
   4   7   1        604.27        622.08        46.65 o
   5   7   1        487.70        460.84        29.93 o
   6   7   1        141.91        212.48        34.23 o
   7   7   1       2652.06       2568.21        89.78 o
   8   7   1       2401.87       2402.01        82.85 o
   9   7   1        174.80        299.70        58.16 o
  10   7   1       1386.47       1482.04       144.18 o
  11   7   1         49.04         71.12        44.63 o
  12   7   1        855.20        835.12       118.84 o
  13   7   1       3988.80       3811.74       207.93 o
  14   7   1        178.67        130.17        60.50 o
  15   7   1         99.92        103.20        54.26 o
  16   7   1         59.27         99.76        26.13 o
  17   7   1       1035.62       1166.76       124.32 o
  18   7   1        145.01        110.34        76.09 o
  19   7   1         45.93         44.72        27.80 o
   1   8   1        380.79        360.82        47.11 o
   2   8   1       4379.00       4238.79       136.96 o
   3   8   1        882.71        921.92        77.52 o
   4   8   1       3225.47       3126.08       104.96 o
   5   8   1       1998.89       1914.53        91.43 o
   6   8   1       4397.43       4414.08       133.31 o
   7   8   1        133.47        106.98        19.11 o
   8   8   1        124.42        194.70        48.29 o
   9   8   1        432.45        315.95        82.11 o
  10   8   1         79.92         59.80        54.24 o
  11   8   1       1204.65       1149.02       150.49 o
  12   8   1       3280.18       3874.30       217.40 o
  13   8   1        226.30        161.15        64.77 o
  14   8   1        955.92        984.63       137.42 o
  15   8   1         13.85          5.23        36.59 o
  16   8   1       1174.50       1368.21       141.71 o
  17   8   1          0.35         31.42        42.07 o
  18   8   1          4.22         43.42        29.20 o
  19   8   1         57.38         42.69        22.53 o
   1   9   1        319.25        377.07        51.15 o
   2   9   1        330.09        287.70        47.38 o
   3   9   1       2922.05       2941.32       151.74 o
   4   9   1         11.70        -18.29        18.29 o
   5   9   1        526.71        551.82        69.47 o
   6   9   1       2858.84       2735.36       111.24 o
   7   9   1       3987.86       4032.42       194.34 o
   8   9   1       1210.36       1120.99       109.95 o
   9   9   1        683.43        784.74       124.06 o
  10   9   1        202.21        170.43        59.46 o
  11   9   1        554.68        481.73        96.77 o
  12   9   1        245.83        249.60        68.35 o
  13   9   1       3330.98       3560.53       213.97 o
  14   9   1        243.77        259.04        66.94 o
  15   9   1        269.65        231.34        59.46 o
  16   9   1         23.23         23.70        38.72 o
  17   9   1        170.16        132.02        63.70 o
  18   9   1         23.62        -32.54        32.54 o
   1  10   1       1699.76       1719.87       101.93 o
   2  10   1       1276.66       1650.49       100.63 o
   3  10   1       1389.57       1250.57        90.03 o
   4  10   1       3716.97       3412.28       137.48 o
   5  10   1        649.18        613.48        59.64 o
   6  10   1        922.11       1104.58       125.31 o
   7  10   1       2709.94       2737.81       155.99 o
   8  10   1         18.69         13.42        35.24 o
   9  10   1        597.01        571.48       105.23 o
  10  10   1        462.55        474.13       100.20 o
  11  10   1        196.69        165.26       108.91 o
  12  10   1        235.70        234.51        55.99 o
  13  10   1        301.00        317.56        71.90 o
  14  10   1        257.75        248.39        59.20 o
  15  10   1         55.78         -2.82        26.44 o
  16  10   1        643.49        706.56       104.37 o
  17  10   1         84.03        129.55        29.97 o
   1  11   1         56.91         44.67        20.41 o
   2  11   1       1618.12       1682.16       105.56 o
   3  11   1       2426.76       2421.56       134.23 o
   4  11   1       1002.94       1042.52       106.81 o
   5  11   1         95.17        109.49        32.57 o
   6  11   1         37.61         56.23        22.74 o
   7  11   1         14.77        163.64        57.00 o
   8  11   1       1174.37       1287.39       139.61 o
   9  11   1         43.02        168.98        43.78 o
  10  11   1        267.04        296.30        87.88 o
  11  11   1         38.05         14.80        21.17 o
  12  11   1       1348.19       1295.53       140.35 o
  13  11   1        612.59        892.22       106.56 o
  14  11   1         16.59         96.67        34.44 o
  15  11   1        122.28        114.74        29.78 o
  16  11   1        219.91        420.34       129.53 o
   1  12   1        953.46       1108.97       104.11 o
   2  12   1        487.25        577.71        84.33 o
   3  12   1       3728.40       3559.33       167.75 o
   4  12   1        341.25        352.13        74.69 o
   5  12   1         16.66         91.36        22.80 o
   6  12   1        208.33        266.68        65.72 o
   7  12   1        684.30        781.29       126.27 o
   8  12   1        436.79        425.11        85.14 o
   9  12   1        328.40        373.80       142.32 o
  10  12   1         37.89        144.37        67.38 o
  11  12   1        875.09       1156.86       126.71 o
  12  12   1          0.59        115.99        71.45 o
  13  12   1        180.33        446.91       144.63 o
  14  12   1         17.93         19.72        53.93 o
   1  13   1        443.81        412.51        63.58 o
   2  13   1       2409.93       2463.95       165.33 o
   3  13   1        503.46        583.63       156.52 o
   4  13   1        628.71        488.34        99.02 o
   5  13   1        162.57        257.35        51.53 o
   6  13   1        125.57         71.60        95.84 o
   7  13   1        315.53        238.96        86.55 o
   8  13   1        613.20        942.73       100.12 o
   9  13   1         98.90        155.97        53.33 o
  10  13   1        187.70        172.10        33.31 o
  11  13   1        266.12        367.52       104.55 o
  12  13   1        910.06       1116.79       114.52 o
  13  13   1        249.59        163.86        50.53 o
   1  14   1        869.54        944.95       136.39 o
   2  14   1       1406.29       1453.05       178.05 o
   3  14   1        462.06        425.56        87.98 o
   4  14   1        870.02        863.50       128.33 o
   5  14   1        227.56        218.25        77.25 o
   6  14   1        103.98         64.51        28.50 o
   7  14   1        183.95        257.73        62.85 o
   8  14   1         52.03         39.50        62.73 o
   9  14   1         78.02         36.41        68.54 o
  10  14   1        165.92        135.69        47.23 o
  11  14   1        176.27         37.95        47.63 o
   1  15   1         75.63         23.78        31.62 o
   2  15   1        103.55        109.07        47.34 o
   3  15   1        966.43       1262.57       115.78 o
   4  15   1         68.35        117.33        55.76 o
   5  15   1         67.33         46.68        70.86 o
   6  15   1          4.57         42.98        29.27 o
   7  15   1        520.43        627.81       116.11 o
   8  15   1        295.28        255.00        43.99 o
   1  16   1        176.00        215.02        51.19 o
   2  16   1        291.51        101.07        60.41 o
   3  16   1          4.75        -37.30        47.05 o
   4  16   1        927.48        947.98       155.66 o
   0   0   2      26629.01      26153.61       279.58 o
   4   0   2      16897.27      16935.51       363.62 o
   6   0   2       9036.94       8691.97       276.49 o
   8   0   2       3343.23       3474.70       191.68 o
  10   0   2       1710.36       1586.34        64.47 o
  12   0   2        573.05        538.03        51.87 o
  14   0   2       3835.05       3626.25       141.53 o
  16   0   2       5620.61       5413.70       184.53 o
  18   0   2        135.90        254.55        69.70 o
  20   0   2       1217.97       1007.21        88.29 o
   0   1   2      18935.72      18801.04       409.51 o
   1   1   2      27281.36      28395.39       477.38 o
   2   1   2      17168.50      17595.60       172.88 o
   3   1   2       8925.79       8467.06        88.22 o
   4   1   2       5716.58       5759.97        97.99 o
   5   1   2       4897.75       5317.01       108.16 o
   6   1   2       4134.62       4493.99       111.45 o
   7   1   2      11637.91      12219.20       157.58 o
   8   1   2       5076.07       5110.23       106.89 o
   9   1   2      15644.06      15159.37       213.92 o
  10   1   2       1215.54       1132.78        39.87 o
  11   1   2       3385.89       3335.87        73.43 o
  12   1   2        518.17        459.16        32.27 o
  13   1   2         47.71         34.99        17.64 o
  14   1   2        672.02        616.42        44.16 o
  15   1   2       1297.02       1232.04        63.47 o
  16   1   2        327.65        372.30        41.40 o
  17   1   2        307.08        401.68        36.87 o
  18   1   2        420.22        543.58        38.02 o
  19   1   2       3116.60       3259.99       116.14 o
  20   1   2        277.59        258.40        40.08 o
  21   1   2        129.14        179.26        33.69 o
   0   2   2      44709.68      44812.17       533.42 o
   1   2   2        525.83        502.24        27.35 o
   2   2   2       7340.61       6927.81        80.16 o
   3   2   2      14248.44      14308.55       190.15 o
   4   2   2       2269.60       2372.47        60.20 o
   5   2   2      13619.01      13284.48       148.39 o
   6   2   2       6510.38       6724.77       101.98 o
   7   2   2       2956.61       2967.05        67.99 o
   8   2   2         48.15         40.59        12.26 o
   9   2   2        311.95        293.75        24.39 o
  10   2   2       7223.66       7287.14       102.19 o
  11   2   2        163.57        208.23        29.19 o
  12   2   2       1918.70       1929.47        70.84 o
  13   2   2       3222.82       3213.60        86.72 o
  14   2   2        328.28        240.37        35.00 o
  15   2   2       3165.55       3109.52       102.93 o
  16   2   2       1055.36       1073.85        68.19 o
  17   2   2        147.97        148.99        29.83 o
  18   2   2         89.97         87.48        35.68 o
  19   2   2        150.27         36.01        32.53 o
  20   2   2        983.11        975.82        77.83 o
  21   2   2        401.49        296.24        41.82 o
   0   3   2       1904.94       2190.23        96.40 o
   1   3   2       5796.41       5780.80        97.50 o
   2   3   2       8206.71       7799.57        95.69 o
   3   3   2       6219.03       6253.32        78.20 o
   4   3   2        307.54        405.08        30.14 o
   5   3   2       2140.22       2160.07        69.91 o
   6   3   2       9581.11      10260.55       155.78 o
   7   3   2       8604.32       8839.89       147.73 o
   8   3   2       2657.67       2632.12        83.68 o
   9   3   2        170.33        193.77        27.96 o
  10   3   2       9365.89       9447.53       165.41 o
  11   3   2        791.48        771.58        70.45 o
  12   3   2        774.01        831.73        73.45 o
  13   3   2       1172.78       1160.06        87.31 o
  14   3   2       1803.27       1736.63        97.28 o
  15   3   2        222.45        330.15        58.47 o
  16   3   2        433.33        456.12        70.02 o
  17   3   2        467.05        523.20        86.38 o
  18   3   2        445.96        561.46        90.70 o
  19   3   2        149.11        184.72        29.44 o
  20   3   2        903.93       1045.69        83.71 o
  21   3   2        133.83        307.86        37.17 o
   0   4   2       9982.49      10157.93       237.39 o
   1   4   2       3157.91       3672.63        97.91 o
   2   4   2        534.82        670.12        33.20 o
   3   4   2       6891.59       7035.42       101.82 o
   4   4   2       2492.52       2503.68        55.44 o
   5   4   2      43860.93      44350.21       328.34 o
   6   4   2        614.17        612.49        23.69 o
   7   4   2       2649.26       2621.33        89.66 o
   8   4   2        588.53        590.46        50.19 o
   9   4   2       6216.56       6136.98       143.48 o
  10   4   2        516.56        591.88        52.01 o
  11   4   2       5513.00       5399.04       139.54 o
  12   4   2       1330.45       1189.77        88.77 o
  13   4   2        103.38        133.10        52.41 o
  14   4   2       1314.29       1382.19       115.87 o
  15   4   2         48.79         15.61        23.72 o
  16   4   2        142.69         82.08        47.19 o
  17   4   2        122.40        141.01        35.49 o
  19   4   2        409.76        635.70        75.51 o
  20   4   2        174.07        324.97        67.96 o
  21   4   2        609.24        685.41        88.29 o
   0   5   2       6421.19       6149.65       203.71 o
   1   5   2      11811.21      12003.77       320.80 o
   2   5   2       5029.44       5269.64       110.10 o
   3   5   2        754.33        787.06        40.19 o
   4   5   2      14544.08      14967.74       169.61 o
   5   5   2        382.16        452.77        25.21 o
   6   5   2       4874.81       4483.45        82.94 o
   7   5   2       1674.14       1793.17        48.40 o
   8   5   2       2730.37       2690.42        60.34 o
   9   5   2       2249.65       2078.02        91.09 o
  10   5   2       2150.11       1915.19        87.64 o
  11   5   2       1198.27       1083.02        70.30 o
  12   5   2        509.19        528.94        89.94 o
  13   5   2        332.54        406.60        81.63 o
  14   5   2       2102.64       2095.17       144.54 o
  15   5   2       1027.89       1040.69       111.41 o
  16   5   2        652.42        830.27        94.33 o
  17   5   2         63.33         43.22        30.45 o
  18   5   2        494.26        459.06       110.36 o
  19   5   2        294.94        311.68        91.19 o
  20   5   2        246.85        243.28        67.38 o
   0   6   2      32875.10      32991.39       537.46 o
   1   6   2      10266.08       9998.75       184.11 o
   2   6   2       1142.79       1239.95        73.78 o
   3   6   2       1266.70       1386.39        61.62 o
   4   6   2        808.91        997.10        47.83 o
   5   6   2       1296.56       1397.07        52.52 o
   6   6   2       1736.10       1680.68        57.94 o
   7   6   2       2764.83       2604.06        67.90 o
   8   6   2        120.57         82.60        17.04 o
   9   6   2       1276.66       1225.09        81.39 o
  10   6   2       3444.30       3280.31       146.23 o
  11   6   2       3365.93       3291.64       185.67 o
  12   6   2        506.26        451.23        93.63 o
  13   6   2        234.52        255.72        63.45 o
  14   6   2        252.65        182.17       101.09 o
  15   6   2       1336.58       1227.90       123.30 o
  16   6   2       1765.04       1937.06       140.24 o
  17   6   2        903.72        935.23       104.04 o
  18   6   2        162.99        199.10        30.76 o
  19   6   2        735.84        721.73       128.37 o
  20   6   2        424.26        537.88        74.35 o
   0   7   2        681.22        638.73        72.66 o
   1   7   2        917.25        856.06        63.72 o
   2   7   2         90.16         90.72        24.42 o
   3   7   2       1963.92       1777.45        75.28 o
   4   7   2        475.18        485.86        43.21 o
   5   7   2       4494.40       4674.73       107.38 o
   6   7   2       1759.32       1746.88        73.03 o
   7   7   2       5456.43       5052.80       117.93 o
   8   7   2         16.24        -12.92        21.35 o
   9   7   2       1511.65       1500.87       106.08 o
  10   7   2        258.40        180.42        36.23 o
  11   7   2       1246.11       1091.27       137.69 o
  12   7   2        145.11        193.61        68.77 o
  13   7   2       1625.06       1695.64       154.13 o
  14   7   2        971.05       1255.62       129.46 o
  15   7   2       2640.99       2836.82       178.94 o
  16   7   2        110.97        164.44        52.97 o
  17   7   2        556.28        619.61        92.41 o
  18   7   2         10.98        -14.58        21.73 o
  19   7   2        861.74        747.94        97.66 o
   0   8   2      16623.96      17232.62       457.48 o
   1   8   2        216.39        289.32        42.66 o
   2   8   2        399.24        473.21        52.63 o
   3   8   2        545.85        671.10        56.87 o
   4   8   2       1792.61       1667.84        76.49 o
   5   8   2       1306.04       1174.29        77.36 o
   6   8   2       1168.78       1071.30        66.75 o
   7   8   2       1312.87       1150.42       118.85 o
   8   8   2       2133.08       2085.09       131.06 o
   9   8   2        232.59        217.19        50.05 o
  10   8   2       3910.95       4217.99       219.62 o
  11   8   2       2290.30       2012.70       155.45 o
  12   8   2        168.28        148.78        56.75 o
  13   8   2        723.43        752.21       125.37 o
  14   8   2        255.82        156.14        48.20 o
  15   8   2        400.58        410.48        91.36 o
  16   8   2        229.31        232.16        57.44 o
  17   8   2         92.10         59.31        62.42 o
  18   8   2        480.91        330.14        53.41 o
  19   8   2        176.74        213.82        43.83 o
   0   9   2       3025.40       2842.71       156.16 o
   1   9   2       3822.02       3613.01       124.24 o
   2   9   2         90.64         73.50        14.92 o
   3   9   2       1300.57       1269.62        85.74 o
   4   9   2       1845.84       2026.80       102.00 o
   5   9   2        193.00        291.62        48.41 o
   6   9   2       2664.05       2961.04       157.54 o
   7   9   2       6176.57       6323.55       231.48 o
   8   9   2        435.07        388.21        71.18 o
   9   9   2       9682.72      10261.43       352.69 o
  10   9   2        497.96        446.93        93.13 o
  11   9   2       2167.68       2447.37       172.55 o
  12   9   2        340.90        358.77        80.11 o
  13   9   2        635.07        653.91       105.60 o
  14   9   2        553.80        598.48       104.95 o
  15   9   2        397.23        549.91       101.00 o
  16   9   2        116.11        132.44        90.61 o
  17   9   2        129.11        103.27        25.77 o
  18   9   2         21.96         19.45        26.03 o
   0  10   2        249.10        345.88        67.48 o
   1  10   2        475.67        472.24        63.20 o
   2  10   2         73.53        129.50        25.57 o
   3  10   2        304.05        286.19        66.65 o
   4  10   2       1533.85       1744.67       102.40 o
   5  10   2       1967.60       2086.00       140.36 o
   6  10   2       1226.81       1253.50       134.61 o
   7  10   2        368.42        415.94        79.31 o
   8  10   2        175.16         91.40        42.37 o
   9  10   2        885.11       1062.98       145.53 o
  10  10   2       1881.38       2030.67       166.41 o
  11  10   2       1832.73       1991.30       188.63 o
  12  10   2        918.45        776.34       127.63 o
  13  10   2        102.23        175.24        41.82 o
  14  10   2         98.43         74.05        33.59 o
  15  10   2         44.41         62.21        28.08 o
  16  10   2       1200.91       1467.68       156.25 o
  17  10   2         74.66        108.44        41.25 o
   0  11   2       2221.97       2116.96       187.84 o
   1  11   2       1127.99       1166.54       105.03 o
   2  11   2        664.64        715.72        79.89 o
   3  11   2         15.75         13.75        19.82 o
   4  11   2       2903.28       3474.11       178.74 o
   5  11   2        937.01        853.64       104.71 o
   6  11   2        668.13        671.74        96.17 o
   7  11   2          8.01         15.94        17.90 o
   8  11   2         48.99         51.79        53.78 o
   9  11   2       1498.71       1778.99       170.42 o
  10  11   2        502.40        500.29        96.26 o
  11  11   2        696.41        811.30       128.60 o
  12  11   2        242.64        273.79        85.34 o
  13  11   2        210.28        273.89        53.05 o
  14  11   2        573.19        523.00       118.89 o
  15  11   2        242.44        294.40        62.82 o
  16  11   2        335.76        192.44        27.62 o
   0  12   2          2.07         63.08        42.40 o
   1  12   2        774.92        688.99        90.96 o
   2  12   2        178.18        164.20        40.00 o
   3  12   2        809.71        699.39       118.40 o
   4  12   2       1010.00       1183.40       136.53 o
   5  12   2       5534.86       5854.50       241.94 o
   6  12   2        162.34        214.45        46.28 o
   7  12   2        324.87        413.27        97.28 o
   8  12   2        238.22        285.87        64.76 o
   9  12   2        194.99        193.11        42.69 o
  10  12   2         40.83         39.46        55.03 o
  11  12   2         65.65        171.00        43.16 o
  12  12   2         30.12         92.12        32.79 o
  13  12   2        219.09        245.35        45.35 o
  14  12   2        106.70        187.32        50.45 o
   0  13   2       1892.79       2119.01       195.67 o
   1  13   2        359.73        295.75        49.40 o
   2  13   2        847.03       1006.06       144.51 o
   3  13   2        133.12         23.50        32.65 o
   4  13   2        919.70        948.27       196.40 o
   5  13   2         42.68         11.19        22.27 o
   6  13   2        116.83         93.50        31.89 o
   7  13   2         13.73         21.57        74.35 o
   8  13   2       1359.25       1466.48       145.97 o
   9  13   2        405.04        598.58        70.39 o
  10  13   2       1157.85       1251.55       184.46 o
  11  13   2        474.76        707.98        89.11 o
  12  13   2        611.18        769.84        86.08 o
  13  13   2         13.03         -9.32        54.22 o
   0  14   2        582.73        576.07        68.98 o
   1  14   2        498.61        486.97        85.99 o
   2  14   2          6.67        -20.85        20.85 o
   3  14   2        371.18        349.31        53.13 o
   4  14   2       1382.59       1441.21       137.35 o
   5  14   2       1223.66       1636.38       252.09 o
   6  14   2        276.26        341.80        75.00 o
   7  14   2        161.37        271.84        79.00 o
   8  14   2        235.75        193.54        60.41 o
   9  14   2        177.11        301.47        72.29 o
  10  14   2        255.21        302.63       109.20 o
  11  14   2        212.27        351.07        67.31 o
   0  15   2        152.79        189.36        56.92 o
   1  15   2       1126.55       1381.03       225.54 o
   2  15   2        110.20         54.35        51.81 o
   3  15   2        179.57        221.21        44.79 o
   4  15   2         80.76        202.83        38.66 o
   5  15   2         27.98         80.39        67.38 o
   6  15   2        364.71        300.09       328.77 o
   7  15   2         75.27        180.94        41.24 o
   8  15   2         33.60        122.42        35.00 o
   0  16   2        503.87        674.96       103.39 o
   1  16   2        285.99        415.89        95.26 o
   2  16   2         13.60        126.05        92.36 o
   3  16   2        326.95        322.96        97.58 o
   4  16   2        297.17        164.96        48.79 o
   2   0   3      25678.10      24593.05       442.61 o
   4   0   3       8394.89       9018.41       285.78 o
   6   0   3      21771.47      21844.93       485.60 o
   8   0   3        538.24        766.73        87.13 o
  10   0   3       5443.23       5341.57       262.55 o
  12   0   3       2427.48       2270.90        84.08 o
  14   0   3        659.85        690.68        64.81 o
  16   0   3       1325.04       1659.77       128.37 o
  18   0   3       2059.66       2058.24       105.89 o
  20   0   3        482.09        408.92        41.82 o
   1   1   3       2962.55       2455.82       118.90 o
   2   1   3      18432.98      18883.40       191.91 o
   3   1   3       8857.10       8314.98       113.86 o
   4   1   3       8268.31       8562.63       109.13 o
   5   1   3       2650.59       2760.09        86.76 o
   6   1   3       2000.22       2175.12        89.04 o
   7   1   3       9256.81       9355.44       205.77 o
   8   1   3       4757.69       4572.81       150.74 o
   9   1   3        383.27        378.39        30.96 o
  10   1   3        422.49        427.13        36.91 o
  11   1   3        522.48        629.68        44.06 o
  12   1   3        782.70        661.46        32.14 o
  13   1   3       7639.33       7590.26       115.98 o
  14   1   3        896.33        967.56        45.49 o
  15   1   3         47.25         41.95        16.40 o
  16   1   3        346.73        406.73        35.48 o
  17   1   3       1582.62       1502.30        65.84 o
  18   1   3        541.49        564.17        83.42 o
  19   1   3          1.42         70.27        12.57 o
  20   1   3         43.24         36.01        12.78 o
  21   1   3        194.89        156.83        34.85 o
   1   2   3      29054.73      28761.17       334.31 o
   2   2   3        301.05        227.89        38.18 o
   3   2   3       1228.48       1349.48        69.38 o
   4   2   3      19137.61      20192.44       231.88 o
   5   2   3       4628.40       4891.34       113.88 o
   6   2   3       6565.06       6254.34       112.63 o
   7   2   3       3488.65       3306.93        69.54 o
   8   2   3        586.68        686.09        33.58 o
   9   2   3       1470.77       1442.48        45.27 o
  10   2   3       1213.58       1244.65        40.28 o
  11   2   3       1692.52       1548.85        44.46 o
  12   2   3       2858.50       2808.90        77.41 o
  13   2   3        462.98        424.38        41.82 o
  14   2   3       1087.02       1032.43        54.76 o
  15   2   3        261.07        199.76        37.92 o
  16   2   3        292.59        363.80        37.86 o
  17   2   3        511.33        609.75        72.08 o
  18   2   3        137.40        122.29        26.24 o
  19   2   3        235.36        187.61        38.14 o
  20   2   3        130.96        123.26        22.07 o
  21   2   3        571.59        633.14        61.57 o
   1   3   3       1389.05       1374.37        63.41 o
   2   3   3       5772.37       5394.94        90.80 o
   3   3   3        599.23        756.20        33.83 o
   4   3   3        799.97        788.91        45.22 o
   5   3   3       2032.84       2020.75        61.74 o
   6   3   3       1376.53       1379.68        58.89 o
   7   3   3        262.06        353.27        36.53 o
   8   3   3      14121.43      13829.88       189.43 o
   9   3   3        829.39        844.80        52.35 o
  10   3   3         26.71         13.30        15.09 o
  11   3   3        725.32        732.10        53.90 o
  12   3   3       2540.51       2699.89        91.00 o
  13   3   3       1008.78       1010.68        82.29 o
  14   3   3        565.62        611.73       105.03 o
  15   3   3        253.59        291.80        50.48 o
  16   3   3        359.90        346.82        70.90 o
  17   3   3        229.28        238.93        58.61 o
  18   3   3       1052.80       1129.43       107.08 o
  19   3   3         54.69         38.05        19.17 o
  20   3   3        424.25        427.66       101.65 o
  21   3   3         80.03         29.04        37.17 o
   1   4   3       6249.50       5968.24       127.56 o
   2   4   3       2858.75       2815.91        65.44 o
   3   4   3      21329.95      21297.88       237.50 o
   4   4   3       2982.01       3170.89        58.34 o
   5   4   3       1942.21       1954.78        68.17 o
   6   4   3        214.54        215.93        33.77 o
   7   4   3      11841.80      11674.76       192.69 o
   8   4   3        744.83        766.53        54.27 o
   9   4   3       5385.97       5477.64       135.24 o
  10   4   3        911.00        840.86        58.97 o
  11   4   3       3791.17       3628.11       116.40 o
  12   4   3        148.47        105.57        22.15 o
  13   4   3         71.30         96.82        44.75 o
  14   4   3        328.73        357.07        72.44 o
  15   4   3        463.10        398.52        79.39 o
  16   4   3          0.16        -10.82        18.79 o
  17   4   3       1691.44       2135.37       150.96 o
  18   4   3        200.57        140.56        40.66 o
  19   4   3        327.60        376.78       113.85 o
  20   4   3        192.90        261.97        84.22 o
  21   4   3        523.07        663.77        72.03 o
   1   5   3       1754.22       1882.96        79.50 o
   2   5   3       6304.79       6387.16       121.47 o
   3   5   3       2248.59       2325.86        65.66 o
   4   5   3       1025.21        946.70        42.90 o
   5   5   3        730.51        821.49        31.02 o
   6   5   3          6.59          1.92        10.48 o
   7   5   3       2321.67       2341.03        93.74 o
   8   5   3       4916.53       4779.99       137.14 o
   9   5   3        400.69        507.85        50.62 o
  10   5   3        568.38        553.21        53.43 o
  11   5   3        879.93        757.37        63.67 o
  12   5   3       2656.43       2495.84       118.67 o
  13   5   3        914.11        900.57       117.30 o
  14   5   3        363.45        206.74        57.93 o
  15   5   3        215.44        205.46        51.67 o
  16   5   3       2071.68       2072.13       153.52 o
  17   5   3        347.65        265.67        45.68 o
  18   5   3       1179.01       1396.48       198.65 o
  19   5   3         43.23         49.95        34.85 o
  20   5   3        635.94        632.95       123.72 o
   1   6   3       4879.75       5152.34       141.60 o
   2   6   3        728.04        603.10        46.76 o
   3   6   3       3126.66       2925.95        88.50 o
   4   6   3       3613.71       3597.99        87.63 o
   5   6   3       3175.03       3262.08        78.66 o
   6   6   3       3140.07       3020.79        65.00 o
   7   6   3       4132.78       3673.84       127.61 o
   8   6   3        945.95        782.43        65.88 o
   9   6   3       1068.30       1062.29        81.50 o
  10   6   3        447.14        484.81        76.12 o
  11   6   3        334.80        398.08        68.28 o
  12   6   3       2937.78       2917.93       174.55 o
  13   6   3        912.54        814.91       115.10 o
  14   6   3        210.99        195.04        55.86 o
  15   6   3        393.30        299.63        67.53 o
  16   6   3        825.20        848.55       119.42 o
  17   6   3        426.24        521.51       104.50 o
  18   6   3        215.34        109.20        59.25 o
  19   6   3        152.54        262.55        66.22 o
  20   6   3         35.70         24.46        46.47 o
   1   7   3        870.73        910.82        57.76 o
   2   7   3       2446.56       2391.56        87.72 o
   3   7   3       7022.86       6811.87       147.92 o
   4   7   3         37.32         39.16        11.32 o
   5   7   3         18.07         20.86        13.95 o
   6   7   3        301.64        289.06        30.18 o
   7   7   3       6954.79       7231.87       225.43 o
   8   7   3       4717.79       4323.74       176.95 o
   9   7   3       1279.61       1073.08       102.71 o
  10   7   3        298.93        270.91        58.22 o
  11   7   3        350.68        249.47        78.98 o
  12   7   3        238.93        303.92        78.27 o
  13   7   3       5717.91       5603.94       334.84 o
  14   7   3        181.44        240.38        67.38 o
  15   7   3        153.09        142.59        49.22 o
  16   7   3         12.44         12.55        36.74 o
  17   7   3       1024.81       1090.37       117.33 o
  18   7   3        138.08        127.60        30.90 o
  19   7   3        170.87        334.57        48.79 o
   1   8   3        459.82        499.76        59.98 o
   2   8   3       4976.70       5047.63       163.29 o
   3   8   3        479.74        449.55        51.59 o
   4   8   3       3699.70       3680.44       112.91 o
   5   8   3        250.65        177.22        36.19 o
   6   8   3       7278.86       7191.34       233.56 o
   7   8   3       1260.94       1421.09       123.34 o
   8   8   3       2928.68       2830.64       151.62 o
   9   8   3       1555.61       1421.19       116.20 o
  10   8   3        463.26        437.15        90.19 o
  11   8   3        276.23        344.23        87.36 o
  12   8   3       1982.59       1885.27       158.65 o
  13   8   3         91.45         24.38        31.29 o
  14   8   3        207.75        109.20        63.89 o
  15   8   3         27.87         22.56        39.86 o
  16   8   3       1566.07       1757.78       144.63 o
  17   8   3         60.82         63.95        26.84 o
  18   8   3        162.77        191.88        30.27 o
  19   8   3        209.88        331.09        82.48 o
   1   9   3        793.43        926.20        75.19 o
   2   9   3       1695.80       1559.60        98.07 o
   3   9   3       6763.42       6921.41       186.86 o
   4   9   3       1107.67       1151.23        77.92 o
   5   9   3         25.97          5.46        17.81 o
   6   9   3        415.43        488.85        83.82 o
   7   9   3       2350.89       2348.04       145.29 o
   8   9   3        545.34        638.51        92.06 o
   9   9   3        583.61        570.11        87.51 o
  10   9   3         68.26         87.01        56.38 o
  11   9   3          5.23         53.79        29.42 o
  12   9   3        402.02        523.02       103.23 o
  13   9   3       1699.29       1959.79       177.51 o
  14   9   3         18.79         63.08        26.52 o
  15   9   3        405.70        533.19        92.31 o
  16   9   3         41.38         28.98        40.24 o
  17   9   3        380.47        335.06        61.78 o
  18   9   3         71.92         54.48        52.05 o
   1  10   3        681.06        792.79        83.79 o
   2  10   3         95.03        108.33        41.87 o
   3  10   3        294.50        401.79        57.74 o
   4  10   3       1984.12       1862.01       105.33 o
   5  10   3        299.40        281.13        60.70 o
   6  10   3       5631.35       5637.20       227.91 o
   7  10   3       1541.30       1664.76       144.26 o
   8  10   3       1191.74       1351.99       115.59 o
   9  10   3         47.32         61.44        29.96 o
  10  10   3        145.76        161.10        39.73 o
  11  10   3        253.72        285.59        74.71 o
  12  10   3       1445.72       1437.54       151.74 o
  13  10   3        101.04         77.96        37.76 o
  14  10   3        673.02        743.73       119.21 o
  15  10   3         49.49         23.76        24.36 o
  16  10   3        348.09        157.04       120.24 o
  17  10   3        161.89        178.80        25.11 o
   1  11   3         38.59         26.15        21.56 o
   2  11   3       1363.91       1503.32        94.04 o
   3  11   3        867.74        860.71        73.84 o
   4  11   3        195.89        212.56        52.85 o
   5  11   3        520.06        437.16        77.11 o
   6  11   3        867.36        911.41       116.29 o
   7  11   3        168.88        116.70        28.52 o
   8  11   3       2857.08       3059.55       198.11 o
   9  11   3        372.10        470.62       103.50 o
  10  11   3         10.10         52.07        25.03 o
  11  11   3        329.76        154.48        59.70 o
  12  11   3        829.04       1191.03       130.36 o
  13  11   3        418.80        464.76        79.28 o
  14  11   3        329.18        418.87        61.90 o
  15  11   3         48.79        106.04        52.28 o
  16  11   3        207.95        227.70        52.28 o
   1  12   3       1061.65        996.38        96.82 o
   2  12   3        168.70        127.54        21.17 o
   3  12   3        542.40        651.54       114.37 o
   4  12   3        208.54        198.49        38.57 o
   5  12   3        510.43        540.20        82.77 o
   6  12   3        197.17        191.41        42.10 o
   7  12   3       1866.54       2101.10       168.23 o
   8  12   3        119.37        141.39        41.83 o
   9  12   3        855.45       1174.01       127.00 o
  10  12   3          4.76         62.45       139.41 o
  11  12   3        181.30        329.12        94.66 o
  12  12   3         37.71        217.78        49.17 o
  13  12   3         91.57        168.98        46.40 o
  14  12   3         35.91         -3.69        27.21 o
   1  13   3         76.25         74.52        27.34 o
   2  13   3       2722.20       2774.86       185.47 o
   3  13   3        498.50        569.45       101.32 o
   4  13   3         88.73         62.96        29.06 o
   5  13   3         79.41         98.14        25.36 o
   6  13   3         38.55         18.56        40.66 o
   7  13   3        294.93        284.78        48.78 o
   8  13   3       1356.09       1716.79       141.59 o
   9  13   3        155.41        159.07        34.85 o
  10  13   3        368.04        183.69        70.86 o
  11  13   3         22.77         70.46        43.63 o
  12  13   3        380.19        533.31        72.86 o
   1  14   3        347.11        347.61        60.19 o
   2  14   3        374.75        396.59       109.17 o
   3  14   3        900.30       1113.31       123.75 o
   4  14   3        207.49        254.80        43.56 o
   5  14   3        402.73        221.59        39.39 o
   6  14   3        286.06        291.03        79.72 o
   7  14   3        276.25        343.13        86.89 o
   8  14   3         73.43        -23.70        44.15 o
   9  14   3        187.94        154.00        33.73 o
  10  14   3         80.89         73.76        85.39 o
  11  14   3        244.31        360.13       119.66 o
   1  15   3          4.72         31.37        39.43 o
   2  15   3         93.78         40.91        30.06 o
   3  15   3        918.96        985.75       123.70 o
   4  15   3         89.06        163.18        39.33 o
   5  15   3         51.98         33.69        23.73 o
   6  15   3         34.06        318.31        72.03 o
   7  15   3        443.83        493.11        95.93 o
   8  15   3        323.26        108.03        47.05 o
   1  16   3        112.57        225.59        45.18 o
   2  16   3         27.39         54.60        48.79 o
   3  16   3         17.05         39.53        49.79 o
   0   0   4     104424.52     109646.34      1457.95 o
   2   0   4      30953.79      32504.02       340.40 o
   4   0   4        850.01        844.94        87.13 o
   6   0   4       1245.01        956.09       105.72 o
   8   0   4      11128.36      11111.82       370.59 o
  10   0   4      17667.46      17691.79       498.38 o
  12   0   4        245.85        271.16        40.08 o
  14   0   4       1732.57       1538.88        75.30 o
  16   0   4        948.83       1045.66        62.19 o
  18   0   4       1072.53       1023.09        69.83 o
  20   0   4       1694.91       1799.50       103.39 o
   0   1   4      33874.27      33511.96       477.61 o
   1   1   4       2993.99       3006.57        74.41 o
   2   1   4      68927.34      70548.84       586.75 o
   3   1   4       6340.09       6060.11       113.02 o
   4   1   4       2320.34       2645.60        71.51 o
   5   1   4       3491.06       3168.71        93.73 o
   6   1   4       3577.83       3239.00       128.20 o
   7   1   4       6683.57       6686.95       186.01 o
   8   1   4       1413.57       1352.84        72.10 o
   9   1   4       2144.70       2387.97        99.92 o
  10   1   4        386.58        478.25        52.39 o
  11   1   4       2283.44       2244.97        75.45 o
  12   1   4        336.01        335.52        46.70 o
  13   1   4       4698.23       4864.55        77.62 o
  14   1   4        929.26        892.27        54.94 o
  15   1   4        572.08        654.35        36.07 o
  16   1   4        401.88        454.50        31.34 o
  17   1   4        794.50        839.22        46.41 o
  18   1   4        221.79        183.97        19.70 o
  19   1   4       1061.17       1146.50        53.27 o
  20   1   4         54.42         65.06        31.37 o
  21   1   4        289.18        313.66        32.53 o
   0   2   4      14189.33      16896.01       519.29 o
   1   2   4       2419.28       2699.38       102.88 o
   2   2   4       1544.78       1799.43        84.39 o
   3   2   4       1317.32       1224.25        53.84 o
   4   2   4       5385.77       5579.35       129.11 o
   5   2   4      10283.01      10253.50       145.33 o
   6   2   4       9913.96      10101.81       178.20 o
   7   2   4       1800.67       1769.75        68.45 o
   8   2   4       1652.03       1685.28        62.24 o
   9   2   4       3919.29       3764.43        74.95 o
  10   2   4       7230.48       6974.41       119.48 o
  11   2   4       6648.05       6438.01       139.78 o
  12   2   4       2314.12       2128.73        62.34 o
  13   2   4        511.52        515.36        37.76 o
  14   2   4         84.17        120.14        29.30 o
  15   2   4        786.26        710.38        86.81 o
  16   2   4       1380.63       1358.31        94.04 o
  17   2   4        306.31        330.51        48.53 o
  18   2   4          2.23          3.49        40.66 o
  19   2   4        601.38        568.69       147.54 o
  20   2   4        474.59        373.11        47.63 o
  21   2   4        161.97        201.99        42.40 o
   0   3   4      14550.16      14506.36       534.39 o
   1   3   4       7381.89       7381.67       186.72 o
   2   3   4        765.00        793.06        67.36 o
   3   3   4       1813.56       1937.20        93.54 o
   4   3   4      20074.42      20721.12       245.66 o
   5   3   4       1539.13       1407.11        46.56 o
   6   3   4      17235.96      17016.17       242.94 o
   7   3   4       1678.81       1722.34        66.68 o
   8   3   4         81.11        101.73        24.00 o
   9   3   4       4349.49       4240.47       104.82 o
  10   3   4       2019.45       1916.10        72.33 o
  11   3   4       2233.73       2362.62        81.39 o
  12   3   4       1571.42       1569.57        69.08 o
  13   3   4          6.71         15.96        26.63 o
  14   3   4       1714.51       1714.93        99.43 o
  15   3   4        239.19        197.52        46.82 o
  16   3   4        991.67       1056.27        94.33 o
  17   3   4         26.81         85.96        22.12 o
  18   3   4        623.87        668.87        75.60 o
  19   3   4        112.38         61.57        46.47 o
  20   3   4        417.04        451.99        89.45 o
  21   3   4        142.56        170.87        21.27 o
   0   4   4       3610.32       3554.40       142.81 o
   1   4   4       4832.89       4434.41       149.84 o
   2   4   4       2931.34       2864.12        72.18 o
   3   4   4        113.00        124.07        18.24 o
   4   4   4         18.09         -5.79        14.64 o
   5   4   4      13260.23      13279.74       185.08 o
   6   4   4       1168.89       1180.53        35.73 o
   7   4   4       3591.83       3864.69       110.87 o
   8   4   4       2863.44       2654.10        93.63 o
   9   4   4       4944.48       4714.59       125.32 o
  10   4   4       3005.64       2919.44       101.08 o
  11   4   4       1010.34       1002.85        68.42 o
  12   4   4       4679.94       4639.81       132.16 o
  13   4   4        327.59        392.59        42.13 o
  14   4   4       1457.83       1241.88        89.37 o
  15   4   4       1688.75       1893.33       128.16 o
  16   4   4        630.31        567.97        81.60 o
  17   4   4         25.85         57.23        24.56 o
  18   4   4         42.65         60.41        25.56 o
  19   4   4        756.42        731.23        82.63 o
  20   4   4        169.17        115.01        34.85 o
  21   4   4        854.50        882.90       111.52 o
   0   5   4      11948.81      12376.87       297.84 o
   1   5   4       3310.65       3385.02       107.85 o
   2   5   4       6982.49       6922.76       127.79 o
   3   5   4        962.39        933.74        43.03 o
   4   5   4       2599.69       2403.12        62.96 o
   5   5   4       2654.48       2652.79        44.88 o
   6   5   4        429.38        349.30        33.87 o
   7   5   4       1598.15       1536.06        77.51 o
   8   5   4        394.21        381.48        44.58 o
   9   5   4        677.85        596.92        54.55 o
  10   5   4       5624.84       5392.85       150.23 o
  11   5   4        821.71        864.92        67.43 o
  12   5   4       2315.47       2152.74       105.03 o
  13   5   4       1085.82       1001.44       122.05 o
  14   5   4        709.28        816.62       110.70 o
  15   5   4        242.56        249.48        55.85 o
  16   5   4        808.81        802.99       110.10 o
  17   5   4        518.52        592.22       109.58 o
  18   5   4       1015.99       1328.94       114.05 o
  19   5   4        120.49        221.89        52.28 o
  20   5   4       1047.25       1150.68       118.81 o
   0   6   4       4168.61       4165.26       184.34 o
   1   6   4       2378.46       2519.63       101.48 o
   2   6   4       1140.17       1099.90        57.45 o
   3   6   4       3185.57       3177.07        87.03 o
   4   6   4       6690.84       6612.17       120.44 o
   5   6   4       1148.77        958.42        40.18 o
   6   6   4        530.57        401.87        35.24 o
   7   6   4        115.54         51.17        16.36 o
   8   6   4        460.88        428.98        43.45 o
   9   6   4        246.14        210.12        49.00 o
  10   6   4       1450.93       1322.47       107.65 o
  11   6   4        331.80        368.19        67.25 o
  12   6   4       1189.71       1208.49       128.98 o
  13   6   4        695.69        863.89       121.11 o
  14   6   4       1062.90       1137.09       119.25 o
  15   6   4       2679.46       2901.08       222.40 o
  16   6   4       1382.20       1608.70       135.29 o
  17   6   4         33.68         36.19        19.20 o
  18   6   4         50.11         81.61        40.66 o
  19   6   4        201.66        128.51       136.50 o
  20   6   4        137.25         40.60        58.67 o
   0   7   4       4423.14       4111.29       163.34 o
   1   7   4       7457.19       7654.24       188.08 o
   2   7   4         90.16         97.25        23.92 o
   3   7   4       1128.23       1091.67        61.93 o
   4   7   4        811.06        839.64        52.91 o
   5   7   4         40.48         40.57        16.49 o
   6   7   4       1853.47       1614.27        96.23 o
   7   7   4        341.90        224.36        59.20 o
   8   7   4         74.35         52.52        36.90 o
   9   7   4       2324.83       2539.23       142.44 o
  10   7   4        161.42        179.17        53.13 o
  11   7   4        481.87        303.20        65.79 o
  12   7   4         22.30        -14.04        31.46 o
  13   7   4        276.31        314.59        75.65 o
  14   7   4        787.23        898.17       105.36 o
  15   7   4       1440.88       1235.88       130.91 o
  16   7   4         10.85         58.31        23.55 o
  17   7   4         69.92        110.72        26.10 o
  18   7   4          0.49         53.54        38.86 o
  19   7   4       1351.16       1608.27       166.13 o
   0   8   4      14491.36      14639.54       340.50 o
   1   8   4        112.09        103.28        20.87 o
   2   8   4       3001.80       2957.87       104.39 o
   3   8   4        284.39        261.12        39.21 o
   4   8   4       3219.86       3300.98       109.01 o
   5   8   4       1427.24       1455.85        74.77 o
   6   8   4       4333.50       4441.35       186.11 o
   7   8   4        577.97        710.35        97.23 o
   8   8   4        710.80        638.70        93.16 o
   9   8   4        736.09        827.38       106.25 o
  10   8   4       1839.21       1936.56       129.39 o
  11   8   4        732.73        974.82       136.22 o
  12   8   4        583.23        427.30        89.70 o
  13   8   4       1244.27       1417.26       144.75 o
  14   8   4        839.78       1013.98       139.91 o
  15   8   4         32.80         85.60        28.42 o
  16   8   4       1291.27       1463.91       135.54 o
  17   8   4         75.14        130.26        69.86 o
  18   8   4          9.16        -13.80        32.34 o
   0   9   4       3590.51       3492.35       173.35 o
   1   9   4       3926.60       3942.62       142.04 o
   2   9   4        669.32        615.31        56.37 o
   3   9   4       1210.26       1263.46        81.84 o
   4   9   4       1050.80        880.69        70.73 o
   5   9   4       4161.02       4005.67       185.52 o
   6   9   4         61.02         52.10        37.46 o
   7   9   4        621.46        586.54        96.21 o
   8   9   4        962.82       1048.58       121.51 o
   9   9   4       4279.75       4157.28       192.37 o
  10   9   4       1654.51       1757.00       167.33 o
  11   9   4       2532.45       2661.72       190.65 o
  12   9   4        191.68        186.57        60.33 o
  13   9   4        330.93        341.69       109.59 o
  14   9   4         88.89        131.71        51.58 o
  15   9   4        744.21        990.25       138.11 o
  16   9   4        155.35        118.60        34.85 o
  17   9   4        160.54        131.07        59.10 o
  18   9   4        252.47        286.94        82.48 o
   0  10   4       8694.38       8507.81       287.04 o
   1  10   4       1243.32       1152.60        87.79 o
   2  10   4        991.06        803.86       104.02 o
   3  10   4        190.73        187.02        39.25 o
   4  10   4        759.81        883.82       115.40 o
   5  10   4       6064.38       6112.77       236.69 o
   6  10   4        228.51        188.91        52.70 o
   7  10   4       1103.33       1341.50       129.23 o
   8  10   4       1139.79       1362.84       127.06 o
   9  10   4        534.90        460.97        97.39 o
  10  10   4       2714.95       2860.39       190.50 o
  11  10   4        343.06        549.11       102.86 o
  12  10   4        213.40        333.87        76.02 o
  13  10   4        298.59        346.74        79.28 o
  14  10   4        238.33        325.29        66.79 o
  15  10   4       1243.74       1214.24       135.21 o
  16  10   4         73.50        145.63        25.92 o
  17  10   4         97.74        219.56        51.12 o
   0  11   4        213.37        252.04        70.91 o
   1  11   4        629.62        516.29        77.48 o
   2  11   4        291.11        289.72        60.87 o
   3  11   4       4511.57       4601.75       205.41 o
   4  11   4        963.07       1282.67       124.23 o
   5  11   4        503.16        639.74        98.80 o
   6  11   4       1905.10       1955.03       139.67 o
   7  11   4       1556.64       1708.84       127.57 o
   8  11   4         32.71         68.84        29.18 o
   9  11   4         70.17         49.87        30.28 o
  10  11   4       1408.45       1480.41       148.04 o
  11  11   4        121.29        101.78        48.36 o
  12  11   4        172.53        139.02        36.33 o
  13  11   4         90.91        169.30        39.97 o
  14  11   4       1575.94       1702.69       155.62 o
  15  11   4         26.61        137.07        51.75 o
   0  12   4        270.35        232.72        78.14 o
   1  12   4        623.79        623.27        85.96 o
   2  12   4        607.58        432.05        90.55 o
   3  12   4        430.14        401.53        86.60 o
   4  12   4        593.39        534.92        83.44 o
   5  12   4       1041.40       1334.70       128.79 o
   6  12   4        283.41        212.10        55.50 o
   7  12   4        101.91        113.31        25.81 o
   8  12   4          6.07         20.05        26.52 o
   9  12   4       1309.73       1502.09       154.92 o
  10  12   4        588.67        899.77       155.12 o
  11  12   4       1140.34       1451.77       147.66 o
  12  12   4         46.89        153.97        35.71 o
  13  12   4         17.16          3.25        92.94 o
  14  12   4        168.81        164.22        55.76 o
   0  13   4        580.33        459.68       139.41 o
   1  13   4        189.17        159.67        38.51 o
   2  13   4        688.28        738.77       122.05 o
   3  13   4         67.78         40.87        40.48 o
   4  13   4       1665.65       1902.90       180.92 o
   5  13   4         46.27        -10.36        31.74 o
   6  13   4       1418.88       1393.19       155.46 o
   7  13   4         25.70        107.38        47.63 o
   8  13   4        163.44        205.50        32.94 o
   9  13   4         29.30         87.35        30.91 o
  10  13   4        127.80        -29.03        29.03 o
  11  13   4        122.50         67.67        74.35 o
  12  13   4        268.37         93.54        51.13 o
   0  14   4       1857.14       2071.34       446.10 o
   1  14   4        388.71        457.78       108.99 o
   2  14   4        205.52        187.09        37.25 o
   3  14   4        311.49        321.36        76.71 o
   4  14   4        360.82        270.73        51.22 o
   5  14   4        551.39        750.77        73.73 o
   6  14   4         62.65         86.20        85.97 o
   7  14   4         34.87        123.95        37.05 o
   8  14   4        157.49        214.71        41.05 o
   9  14   4        592.19        814.72       162.76 o
  10  14   4        322.21        344.51       121.98 o
   0  15   4         47.43         -3.49        59.25 o
   1  15   4         80.87         -2.42        40.66 o
   2  15   4        375.57        318.13        68.01 o
   3  15   4       1244.67       1235.96       120.55 o
   4  15   4         90.65         93.39        97.00 o
   5  15   4        870.66        911.79       165.54 o
   6  15   4        178.69        147.06        33.03 o
   7  15   4        594.54        772.48        91.46 o
   0  16   4       1566.71       2055.08       262.55 o
   1  16   4        130.12        176.49       124.30 o
   2   0   5       6209.21       6298.85       150.57 o
   4   0   5      11408.84      11018.57       301.47 o
   6   0   5      20042.65      20522.30       433.19 o
   8   0   5        760.05        818.77        87.09 o
  10   0   5        443.32        390.34        85.97 o
  12   0   5      11856.02      12493.74       363.45 o
  14   0   5       2371.75       2197.74       135.05 o
  16   0   5       1879.71       1803.34       111.09 o
  18   0   5        148.23        226.68        46.47 o
  20   0   5        232.67        230.02        20.91 o
   1   1   5       2518.74       2813.18        73.16 o
   2   1   5       4756.29       5046.24       102.71 o
   3   1   5      17393.69      18255.07       271.00 o
   4   1   5       2049.40       2089.47        73.32 o
   5   1   5       7626.38       7881.87       141.80 o
   6   1   5       1225.91       1242.56        58.83 o
   7   1   5       5347.93       5345.45       115.01 o
   8   1   5        647.09        582.62        55.14 o
   9   1   5       2252.28       2165.78        99.51 o
  10   1   5        201.53        157.29        31.50 o
  11   1   5         45.48         58.28        14.86 o
  12   1   5        493.94        461.03        91.51 o
  13   1   5       9037.98       8951.48       191.14 o
  14   1   5        246.77        179.99        39.09 o
  15   1   5       1164.17       1147.53        37.38 o
  16   1   5       1273.18       1182.92        62.70 o
  17   1   5        772.95        850.56        34.85 o
  18   1   5        742.06        829.99        35.47 o
  19   1   5        127.45        224.93        62.73 o
  20   1   5        159.26        146.38        30.20 o
  21   1   5        507.56        535.55        42.98 o
   1   2   5      19684.98      20841.13       316.77 o
   2   2   5       9731.04       9341.54       202.94 o
   3   2   5        331.58        298.40        35.80 o
   4   2   5      15624.96      15068.25       208.36 o
   5   2   5         21.59         17.55         9.26 o
   6   2   5        883.02        822.86        68.41 o
   7   2   5       9752.90       9546.11       167.68 o
   8   2   5        657.79        804.17        54.06 o
   9   2   5       1963.10       1888.19        73.51 o
  10   2   5        292.50        287.62        34.07 o
  11   2   5        871.05        881.99        42.70 o
  12   2   5       2295.32       2292.64        61.75 o
  13   2   5        129.09        158.65        19.25 o
  14   2   5        222.03        240.66        20.30 o
  15   2   5        312.01        293.56        54.08 o
  16   2   5        271.08        408.31        65.83 o
  17   2   5        317.74        412.19        73.06 o
  18   2   5        358.99        327.21        44.53 o
  19   2   5         33.36         75.51        16.26 o
  20   2   5        152.11         82.48        42.98 o
  21   2   5        642.20        658.68        60.41 o
   1   3   5       2613.78       2602.11       118.67 o
   2   3   5       9440.34       8882.94       250.10 o
   3   3   5      14007.76      14712.67       277.31 o
   4   3   5       4044.78       4339.24       114.17 o
   5   3   5       6223.77       6355.99       129.92 o
   6   3   5        677.43        734.63        35.61 o
   7   3   5       1402.80       1236.53        74.77 o
   8   3   5      10198.50       9868.37       188.65 o
   9   3   5       1854.21       1832.89        72.05 o
  10   3   5        107.53        129.69        27.84 o
  11   3   5        312.29        304.35        39.20 o
  12   3   5       1606.06       1610.37        69.49 o
  13   3   5        641.13        626.31        48.85 o
  14   3   5        635.51        559.47        43.07 o
  15   3   5        220.37        123.80        25.11 o
  16   3   5        337.55        438.57        89.45 o
  17   3   5        280.36        267.71        58.57 o
  18   3   5       1641.33       1887.77       129.37 o
  19   3   5         26.45         90.61        17.59 o
  20   3   5        444.40        535.70        42.34 o
  21   3   5        339.47        273.00        53.44 o
   1   4   5       8237.11       8320.38       215.54 o
   2   4   5       3724.49       3977.53        96.13 o
   3   4   5       3112.92       2939.03        78.46 o
   4   4   5         61.29         69.11        13.67 o
   5   4   5          8.25          3.83        13.92 o
   6   4   5       1779.55       1774.64        56.17 o
   7   4   5       8987.42       8506.42       169.47 o
   8   4   5          7.15         12.96        15.96 o
   9   4   5       1490.62       1474.69        73.24 o
  10   4   5        510.01        473.24        47.78 o
  11   4   5       5684.09       5590.36       142.88 o
  12   4   5        324.23        357.40        41.96 o
  13   4   5        976.37        895.21        64.50 o
  14   4   5        169.20        167.96        31.18 o
  15   4   5       1044.60       1011.14       104.08 o
  16   4   5        259.22        191.14       115.59 o
  17   4   5       1106.19       1155.65       164.96 o
  18   4   5        135.42        180.43        39.02 o
  19   4   5        136.60        148.70        33.69 o
  20   4   5         26.31         16.11        72.03 o
   1   5   5        523.98        541.82        55.82 o
   2   5   5       4888.81       4731.08       107.44 o
   3   5   5       3898.53       3843.13        86.67 o
   4   5   5        868.07        749.48        36.97 o
   5   5   5       2333.65       2357.20        43.85 o
   6   5   5        191.35        153.66        15.47 o
   7   5   5       1811.40       1682.36        42.37 o
   8   5   5       2641.83       2582.25       103.66 o
   9   5   5       1368.85       1369.14        77.11 o
  10   5   5        176.17        149.46        32.66 o
  11   5   5        442.79        395.15        42.34 o
  12   5   5       2852.73       2729.60       140.94 o
  13   5   5        105.19         75.55        32.90 o
  14   5   5       1648.20       1672.61       126.27 o
  15   5   5         84.35         51.78        34.55 o
  16   5   5        631.80        568.22        88.85 o
  17   5   5         16.07        127.79        46.47 o
  18   5   5       2081.27       2213.52       160.74 o
  19   5   5         50.42         43.11        45.89 o
  20   5   5         79.33         59.54        23.63 o
   1   6   5       9552.64       9490.77       199.81 o
   2   6   5       3872.79       3806.94       103.94 o
   3   6   5       2586.54       2505.87        77.37 o
   4   6   5       2522.35       2477.69        72.75 o
   5   6   5         46.36         45.15        10.63 o
   6   6   5        822.71        779.39        51.24 o
   7   6   5       1248.45        990.36        74.26 o
   8   6   5        698.55        693.18        88.04 o
   9   6   5        152.35         66.49        37.14 o
  10   6   5        116.98         61.99        39.45 o
  11   6   5        604.37        659.76        91.58 o
  12   6   5       2276.10       2187.21       128.66 o
  13   6   5        619.99        649.13       101.26 o
  14   6   5         36.34         77.58        38.09 o
  15   6   5        250.11        225.84        54.08 o
  16   6   5        631.02        871.47       120.68 o
  17   6   5       1457.00       1409.69       104.18 o
  18   6   5        489.15        465.35       151.02 o
  19   6   5        270.35        238.05        39.35 o
   1   7   5       1471.66       1317.83        81.36 o
   2   7   5       2186.01       2285.26        87.32 o
   3   7   5      14986.87      14942.33       225.55 o
   4   7   5        141.96        107.80        18.63 o
   5   7   5        675.58        525.24        36.82 o
   6   7   5       1218.00       1193.56       118.63 o
   7   7   5        731.90        586.49        86.74 o
   8   7   5        737.97        864.45       107.92 o
   9   7   5        762.18        645.53        92.65 o
  10   7   5        437.75        347.27        65.71 o
  11   7   5        209.71        124.68        36.48 o
  12   7   5         61.74        -12.45        29.43 o
  13   7   5       3116.08       2985.77       256.61 o
  14   7   5        507.31        585.35        99.58 o
  15   7   5        270.43        231.83        57.38 o
  16   7   5        321.79        330.05        62.40 o
  17   7   5       1073.85       1290.66       112.28 o
  18   7   5        116.30        200.79        29.57 o
  19   7   5        295.48        393.14       116.75 o
   1   8   5        147.49        205.20        44.00 o
   2   8   5       4180.09       4188.52       126.37 o
   3   8   5        920.93        996.44        65.91 o
   4   8   5       6622.42       6926.39       170.68 o
   5   8   5       1342.13       1222.72       115.98 o
   6   8   5       3789.94       3692.20       173.34 o
   7   8   5         59.44          8.89        27.80 o
   8   8   5        211.58        107.63        41.23 o
   9   8   5          9.12         19.54        22.08 o
  10   8   5        470.17        482.19        79.35 o
  11   8   5         10.21         -6.09        27.45 o
  12   8   5       1287.41       1597.06       156.29 o
  13   8   5         18.60         79.63        53.27 o
  14   8   5       1001.20       1135.83       127.62 o
  15   8   5         11.76         55.31        25.94 o
  16   8   5        572.06        720.05        84.90 o
  17   8   5        191.61        181.07        37.80 o
  18   8   5        383.19        279.17        38.34 o
   1   9   5        331.46        255.46        48.22 o
   2   9   5       1297.38       1235.19        72.07 o
   3   9   5       3061.79       3128.13       124.35 o
   4   9   5        872.83       1064.21       120.79 o
   5   9   5        114.14        117.60        54.66 o
   6   9   5         54.88         73.49        41.31 o
   7   9   5       3078.25       2907.69       161.96 o
   8   9   5        517.15        641.57        95.23 o
   9   9   5        603.35        695.54        99.12 o
  10   9   5        141.95        154.17        34.42 o
  11   9   5       1240.63       1367.00       146.73 o
  12   9   5         85.12         35.83        38.11 o
  13   9   5       2342.80       2708.22       182.50 o
  14   9   5         12.19         79.86        30.87 o
  15   9   5        542.81        589.77        92.12 o
  16   9   5        176.30         90.12        30.58 o
  17   9   5         55.49         92.90        38.32 o
   1  10   5       1243.60       1300.30        86.45 o
   2  10   5        767.77        748.53        79.69 o
   3  10   5        496.13        578.13        90.45 o
   4  10   5       1283.98       1363.00       115.73 o
   5  10   5       3259.58       3111.15       169.06 o
   6  10   5       3431.86       3470.47       180.96 o
   7  10   5       1018.21       1185.90       119.42 o
   8  10   5       3253.25       3178.10       171.80 o
   9  10   5       1590.91       1740.49       133.58 o
  10  10   5        358.25        180.37        96.18 o
  11  10   5       1077.10       1238.15       137.03 o
  12  10   5        320.62        393.63       102.91 o
  13  10   5        175.80        240.69       104.00 o
  14  10   5        113.82         92.65        62.50 o
  15  10   5        134.62        168.93        34.98 o
  16  10   5        106.69         79.74        40.99 o
   1  11   5         22.16          5.33        23.11 o
   2  11   5       1665.68       1758.97       162.17 o
   3  11   5       1058.70       1045.14       109.63 o
   4  11   5        139.49         82.50        41.75 o
   5  11   5        321.57        427.07        77.86 o
   6  11   5        326.98        338.41        67.62 o
   7  11   5        165.02        298.92        57.34 o
   8  11   5       3345.09       3366.08       183.05 o
   9  11   5        193.41        262.73        56.72 o
  10  11   5         49.64         71.12        49.23 o
  11  11   5        135.05         87.19        27.80 o
  12  11   5        863.71        865.49       131.06 o
  13  11   5        241.80        395.00        79.37 o
  14  11   5        162.43        163.99        44.79 o
  15  11   5         30.70         76.27       120.82 o
   1  12   5        566.23        736.82       121.12 o
   2  12   5         47.01         53.85        40.98 o
   3  12   5        594.75        465.25       100.50 o
   4  12   5         86.82         72.41        20.73 o
   5  12   5         41.79         60.41        38.57 o
   6  12   5         22.07         27.07        19.51 o
   7  12   5       1402.71       1581.27       122.12 o
   8  12   5         21.11        146.53        37.96 o
   9  12   5        980.04       1047.35       148.29 o
  10  12   5         78.55        123.65        28.36 o
  11  12   5        832.93        884.37       138.57 o
  12  12   5        174.46         66.96        56.48 o
  13  12   5        627.79        898.51       129.09 o
  14  12   5        369.58        400.09        67.93 o
   1  13   5        108.11         61.03        37.91 o
   2  13   5       1166.59       1338.59       141.76 o
   3  13   5        196.20        154.05       101.42 o
   4  13   5         18.40         27.85        29.02 o
   5  13   5         94.30         71.86        32.62 o
   6  13   5       1033.52       1002.00       139.84 o
   7  13   5        201.10        413.12        45.06 o
   8  13   5       1912.65       2014.37       163.68 o
   9  13   5         37.30         88.06        50.88 o
  10  13   5        103.16         38.83        55.76 o
  11  13   5         18.40          8.35        31.51 o
  12  13   5        459.51        519.81       144.05 o
   1  14   5        217.39         96.60        38.34 o
   2  14   5        472.30        212.67       108.18 o
   3  14   5        769.40        752.83       117.85 o
   4  14   5        163.28        204.44        38.78 o
   5  14   5        239.48        370.36        86.01 o
   6  14   5        861.06        843.95       154.59 o
   7  14   5        490.14        532.11       104.19 o
   8  14   5        149.81        114.08        54.60 o
   9  14   5         55.05        227.70        91.78 o
  10  14   5        144.20         71.11        63.66 o
   1  15   5        178.20        302.69       123.72 o
   2  15   5        318.35        362.49        67.55 o
   3  15   5       1202.62       1578.21       180.96 o
   4  15   5        342.80        278.21        46.42 o
   5  15   5        181.86        239.31        46.47 o
   6  15   5         77.70        136.49        33.11 o
   7  15   5        645.56        253.92        73.77 o
   0   0   6       7316.73       7762.59       356.65 o
   2   0   6       5093.83       5532.96       154.40 o
   4   0   6       1357.26       1117.92        71.41 o
   6   0   6      11818.16      11590.16       342.69 o
   8   0   6       1353.94       1478.20       131.22 o
  10   0   6       7962.48       8380.31       300.41 o
  12   0   6        615.29        475.14       185.87 o
  14   0   6       3374.92       3404.99       361.29 o
  16   0   6       3509.58       3861.50       120.65 o
  18   0   6        119.54         99.50        59.25 o
  20   0   6        508.06        507.91        26.92 o
   0   1   6        606.27        493.78        78.43 o
   1   1   6       7587.71       7310.74       145.66 o
   2   1   6        683.65        832.68        43.74 o
   3   1   6       3022.89       3396.74        94.00 o
   4   1   6      12828.22      13492.37       211.80 o
   5   1   6       5417.25       5433.67       129.53 o
   6   1   6       1804.70       1931.37        76.37 o
   7   1   6          0.69         -7.03         8.58 o
   8   1   6        213.67        139.75        22.74 o
   9   1   6      10991.67      10677.87       243.14 o
  10   1   6       1377.23       1426.47        87.66 o
  11   1   6       4630.60       4787.15       342.13 o
  12   1   6       3444.31       3320.39       207.80 o
  13   1   6        507.69        396.15       159.16 o
  14   1   6          5.42         -6.13        21.71 o
  15   1   6       1570.46       1365.11        85.12 o
  16   1   6        110.27        114.49        33.74 o
  17   1   6        212.05        194.52        28.30 o
  18   1   6        179.59        243.87        48.72 o
  19   1   6       1486.44       1737.25        79.97 o
  20   1   6        289.25        389.67        83.64 o
  21   1   6        206.60        276.53        26.72 o
   0   2   6       3719.39       3856.90       278.81 o
   1   2   6       2850.87       2677.16        99.99 o
   2   2   6         41.04         23.62        14.59 o
   3   2   6      29703.72      29191.96       907.39 o
   4   2   6       7467.57       7282.36       154.79 o
   5   2   6       5436.52       5560.79       131.68 o
   6   2   6       6071.18       6052.45       134.25 o
   7   2   6       1296.22       1071.42        55.49 o
   8   2   6        906.36        821.64        43.64 o
   9   2   6       1112.22        977.04        39.63 o
  10   2   6       4778.54       4645.74       129.22 o
  11   2   6        195.08        195.32        39.50 o
  12   2   6       2338.16       2171.22        94.10 o
  13   2   6       1030.79       1042.93        46.15 o
  14   2   6       1472.35       1448.42        49.31 o
  15   2   6       1247.12       1185.95        91.00 o
  16   2   6        393.91        369.71        72.74 o
  17   2   6         23.63         20.81        21.11 o
  18   2   6        194.46        141.82        27.52 o
  19   2   6        206.31        205.88        59.83 o
  20   2   6        356.37        489.16        83.64 o
  21   2   6         21.42         28.77        14.78 o
   0   3   6      17203.91      18518.93       667.99 o
   1   3   6       2341.63       2630.76       178.25 o
   2   3   6       3218.28       3293.11       136.95 o
   3   3   6       4364.79       4588.21       132.29 o
   4   3   6       9310.39       9218.28       183.92 o
   5   3   6       3080.03       2959.37        97.56 o
   6   3   6        517.80        413.57        43.09 o
   7   3   6       6558.11       6894.04       120.57 o
   8   3   6       1735.55       1693.10        91.60 o
   9   3   6       1197.41       1233.38        74.55 o
  10   3   6       6828.67       6674.17       160.42 o
  11   3   6       1214.90       1073.84        61.42 o
  12   3   6       2091.33       2076.08        78.94 o
  13   3   6       7042.86       6902.47       142.80 o
  14   3   6        254.10        260.48        28.60 o
  15   3   6       1739.46       1689.33        84.51 o
  16   3   6       1084.62        927.52       182.39 o
  17   3   6        827.21        791.50        87.86 o
  18   3   6        229.58        207.76        72.61 o
  19   3   6        109.30         91.72        33.11 o
  20   3   6        629.91        514.43        61.68 o
   0   4   6       8524.44       8366.69       483.27 o
   1   4   6      17705.94      16496.09       480.95 o
   2   4   6        501.98        558.36        62.02 o
   3   4   6       7129.40       6610.29       208.02 o
   4   4   6       3603.28       3700.47       153.04 o
   5   4   6       3992.50       4031.05        76.00 o
   6   4   6       1060.08       1099.73        55.40 o
   7   4   6        143.53         98.71        31.57 o
   8   4   6        214.00        296.68        42.74 o
   9   4   6       3392.67       3375.18       111.81 o
  10   4   6       1802.70       1650.98        81.47 o
  11   4   6       1488.39       1765.11        81.75 o
  12   4   6         64.92         47.04        30.03 o
  13   4   6       1128.89       1011.55        64.97 o
  14   4   6        664.46        608.10        49.65 o
  15   4   6       2878.52       2897.51       158.18 o
  16   4   6         12.76         58.60        27.20 o
  17   4   6        120.76         56.48        25.87 o
  18   4   6        160.79         85.16        29.42 o
  19   4   6        424.37        469.17        46.93 o
  20   4   6        367.09        337.41        40.14 o
   0   5   6       8907.88       9229.12       268.70 o
   1   5   6        899.40        946.71        88.82 o
   2   5   6       4294.15       4328.71       126.71 o
   3   5   6       1787.79       2081.76        74.85 o
   4   5   6       1509.82       1480.90        59.39 o
   5   5   6        392.11        286.67        26.32 o
   6   5   6       4721.44       4446.22       102.30 o
   7   5   6        421.53        421.86        21.63 o
   8   5   6        639.97        688.26        60.41 o
   9   5   6        417.57        430.43        44.98 o
  10   5   6       1039.76        792.42        63.08 o
  11   5   6         14.24        -18.96        30.90 o
  12   5   6         71.66         29.54        28.27 o
  13   5   6        340.84        297.64        53.69 o
  14   5   6       4941.65       5108.17       224.78 o
  15   5   6        363.57        293.24        62.84 o
  16   5   6        904.18        926.08       104.73 o
  17   5   6        128.92        100.44        32.00 o
  18   5   6        266.97        207.95        68.54 o
  19   5   6        228.20        204.88        38.92 o
  20   5   6        206.27        118.50        30.20 o
   0   6   6       6809.21       6921.78       206.28 o
   1   6   6       4970.47       5180.23       150.26 o
   2   6   6       1707.06       1802.40        74.10 o
   3   6   6       2108.13       2026.85        71.36 o
   4   6   6        703.00        701.66        39.93 o
   5   6   6       4346.01       4444.84        91.53 o
   6   6   6        901.69        945.52        62.70 o
   7   6   6       1307.83       1184.00       107.68 o
   8   6   6          1.71        -19.79        19.79 o
   9   6   6       1990.25       1942.33       124.37 o
  10   6   6       1952.11       1759.45       123.36 o
  11   6   6        653.94        751.77        97.65 o
  12   6   6        781.73        710.80        90.07 o
  13   6   6        126.07         93.75        49.10 o
  14   6   6        596.10        622.31       101.53 o
  15   6   6       1089.24       1147.78       117.80 o
  16   6   6        689.47        857.21        99.49 o
  17   6   6        213.37        189.36        46.47 o
  18   6   6         42.37         92.07        24.60 o
  19   6   6        174.69        250.51        74.93 o
   0   7   6       1171.34       1069.22       109.59 o
   1   7   6       4452.94       4413.18       147.51 o
   2   7   6       2568.12       2528.79        92.54 o
   3   7   6       1851.43       1823.31        79.03 o
   4   7   6       1881.91       2029.71        78.56 o
   5   7   6       2150.93       2196.83        97.50 o
   6   7   6       1138.70       1321.64       118.13 o
   7   7   6       2272.17       2422.22       140.78 o
   8   7   6        298.56        208.67        54.23 o
   9   7   6         38.71         50.87        33.58 o
  10   7   6       1030.66        939.90       111.07 o
  11   7   6        823.52        780.42       101.00 o
  12   7   6        387.95        456.76        75.98 o
  13   7   6       1767.20       1911.65       155.32 o
  14   7   6        892.59       1002.06       115.42 o
  15   7   6       2035.70       2335.92       161.96 o
  16   7   6        435.91        444.51        72.96 o
  17   7   6       1950.93       2241.71       144.34 o
  18   7   6        166.38        286.02        33.49 o
  19   7   6        567.75        356.61        57.18 o
   0   8   6      20106.00      19854.94       483.18 o
   1   8   6       2430.71       2470.76       117.51 o
   2   8   6        988.81       1167.30        68.62 o
   3   8   6        737.58        707.28        53.35 o
   4   8   6       1740.50       1433.06        79.41 o
   5   8   6        938.38        924.66       110.42 o
   6   8   6       2295.56       1958.76       139.95 o
   7   8   6        896.38        813.19       107.67 o
   8   8   6        246.02        245.39        63.81 o
   9   8   6        172.76        138.23        46.31 o
  10   8   6       2798.50       3260.18       170.63 o
  11   8   6       1396.80       1454.78       119.03 o
  12   8   6         32.38         48.07        33.51 o
  13   8   6        179.47         67.13        43.75 o
  14   8   6        868.96        847.93       121.98 o
  15   8   6         21.67         39.98        25.40 o
  16   8   6        797.91        728.45       127.61 o
  17   8   6         19.96         84.27        61.73 o
  18   8   6         50.11         60.95        26.13 o
   0   9   6       1875.31       1832.97       128.87 o
   1   9   6       4005.34       3923.89       153.50 o
   2   9   6        432.67        527.55        57.52 o
   3   9   6        688.34        742.53        64.92 o
   4   9   6       1082.86       1235.53       120.71 o
   5   9   6       2495.96       2395.72       154.83 o
   6   9   6       2473.42       2590.06       156.59 o
   7   9   6       2300.26       2438.01       153.55 o
   8   9   6        104.50        109.98        39.07 o
   9   9   6        926.11       1029.72       121.19 o
  10   9   6       1238.34       1061.97       121.04 o
  11   9   6        635.15        735.22       140.16 o
  12   9   6         61.75         77.56        24.03 o
  13   9   6        380.79        272.84        70.61 o
  14   9   6        854.80        979.29       138.46 o
  15   9   6        345.88        411.64        78.85 o
  16   9   6        205.52        286.98        70.91 o
  17   9   6        279.84        231.75        40.63 o
   0  10   6        337.09        228.97        59.67 o
   1  10   6        370.75        311.16        48.62 o
   2  10   6       1086.65       1120.89        83.02 o
   3  10   6       1157.68       1283.32       138.82 o
   4  10   6       1033.95       1289.00       113.17 o
   5  10   6       1799.99       1854.39       140.05 o
   6  10   6        762.48       1153.66       117.44 o
   7  10   6        505.82        489.01        88.37 o
   8  10   6         13.06         19.72        23.81 o
   9  10   6       1925.77       2104.63       143.40 o
  10  10   6       2314.15       2496.64       178.60 o
  11  10   6        227.54        275.47        73.27 o
  12  10   6        475.41        505.11        89.62 o
  13  10   6          7.08         56.52        60.61 o
  14  10   6        126.88        168.10        38.66 o
  15  10   6        179.41        236.58        55.64 o
  16  10   6        465.02        723.06       126.07 o
   0  11   6        774.93        766.77       131.08 o
   1  11   6        548.31        541.76        72.66 o
   2  11   6        793.91        785.01       103.55 o
   3  11   6        104.42        122.24        33.70 o
   4  11   6       1680.25       1949.03       135.26 o
   5  11   6        168.61         31.45        46.28 o
   6  11   6       1549.53       1714.07       143.70 o
   7  11   6         76.73        120.15        61.20 o
   8  11   6        357.66        304.35        53.18 o
   9  11   6        886.11        876.86       173.93 o
  10  11   6       2021.48       2203.84       165.86 o
  11  11   6        453.10        660.26       111.12 o
  12  11   6        108.33        186.73        44.56 o
  13  11   6        312.03        264.70        62.15 o
  14  11   6        775.26        815.51        90.45 o
  15  11   6        151.71        291.01        69.12 o
   0  12   6        197.05        133.00        64.48 o
   1  12   6        490.37        503.87        90.41 o
   2  12   6        183.18        152.18        51.48 o
   3  12   6        758.07        646.56       110.41 o
   4  12   6         32.19         97.03        30.05 o
   5  12   6       3527.70       3964.40       201.56 o
   6  12   6        121.17        135.20        40.58 o
   7  12   6          1.45         36.96        26.83 o
   8  12   6        762.95       1093.94       114.13 o
   9  12   6        490.59        606.29       105.89 o
  10  12   6        136.15        178.46        60.35 o
  11  12   6        160.22        159.32        78.55 o
  12  12   6          8.82         62.47        32.80 o
  13  12   6        241.39        283.40        86.08 o
   0  13   6       1198.85       1937.74       418.22 o
   1  13   6        474.06        517.40       129.38 o
   2  13   6       1340.38       1382.76       164.64 o
   3  13   6        228.85        206.34        56.00 o
   4  13   6        374.91        312.87       128.06 o
   5  13   6          4.81        -23.37        23.37 o
   6  13   6        329.37        223.57        47.61 o
   7  13   6        204.95        182.70        58.67 o
   8  13   6        232.32        221.84        85.99 o
   9  13   6        132.04         88.78        48.13 o
  10  13   6       1252.57       1421.65       125.60 o
  11  13   6        164.27        127.88        62.45 o
  12  13   6        295.17        295.08        91.78 o
   0  14   6        623.81        472.82       184.71 o
   1  14   6        343.57        231.18        75.51 o
   2  14   6         44.35         40.61        41.29 o
   3  14   6        102.26        127.23        25.16 o
   4  14   6        724.82        775.07       120.53 o
   5  14   6       1280.94       1281.84       132.89 o
   6  14   6        297.03        497.33        67.37 o
   7  14   6        177.27        207.66        51.12 o
   8  14   6        187.58        140.57        75.51 o
   9  14   6        835.71        680.88       135.77 o
   0  15   6        545.04        342.71       109.20 o
   1  15   6        900.32       1039.04       134.60 o
   2  15   6         35.52        128.15        38.51 o
   3  15   6        271.88        235.10        46.28 o
   4  15   6         18.41         -5.75        71.48 o
   5  15   6        394.67        385.33        77.03 o
   6  15   6        258.69        249.76        42.40 o
   2   0   7       1882.28       1754.81        93.21 o
   4   0   7       1671.91       1720.76        92.28 o
   6   0   7       4498.35       4415.79       146.45 o
   8   0   7       3325.14       2713.71       181.94 o
  10   0   7        809.95        840.15       104.21 o
  12   0   7       4016.20       4637.57       441.45 o
  14   0   7        572.47        509.99       161.48 o
  16   0   7       2651.85       2700.24       178.08 o
  18   0   7        458.50        510.55        45.31 o
  20   0   7        155.37        347.35        47.63 o
   1   1   7       1065.04       1304.35        68.99 o
   2   1   7       5109.77       5118.42       114.14 o
   3   1   7      14518.60      14848.88       198.19 o
   4   1   7         74.68         74.75        21.63 o
   5   1   7       1778.06       1915.38        79.06 o
   6   1   7       2106.81       2126.01        87.72 o
   7   1   7       5155.68       4758.99       142.31 o
   8   1   7        744.10        691.70        60.35 o
   9   1   7       1753.30       1591.12        71.43 o
  10   1   7        836.85        824.79        50.92 o
  11   1   7        804.83        754.07        59.71 o
  12   1   7        876.57        837.86        57.90 o
  13   1   7       7739.05       7827.52       175.53 o
  14   1   7        262.77        263.68        26.79 o
  15   1   7        680.75        623.26        33.36 o
  16   1   7        159.49        171.32        13.07 o
  17   1   7       1163.19       1297.56        81.37 o
  18   1   7        229.91        227.67        41.26 o
  19   1   7         41.82         85.97        24.80 o
  20   1   7        155.93        188.23        40.08 o
   1   2   7         39.70         53.32        23.71 o
   2   2   7       9599.76       9418.86       178.42 o
   3   2   7        296.66        355.90        56.39 o
   4   2   7      10485.57      10834.56       207.45 o
   5   2   7       2171.75       2389.68        93.55 o
   6   2   7      14270.50      14065.54       231.76 o
   7   2   7      10974.67      10978.42       199.56 o
   8   2   7        912.43        872.90        53.11 o
   9   2   7       2018.41       1901.17        71.00 o
  10   2   7        258.39        221.02        43.88 o
  11   2   7       1324.85       1436.21        87.57 o
  12   2   7       2345.94       2142.93        91.53 o
  13   2   7        455.72        457.30        37.37 o
  14   2   7       1122.08       1015.17        49.14 o
  15   2   7        153.70        167.78        13.57 o
  16   2   7        848.61        777.15        92.56 o
  17   2   7        618.24        657.28        69.16 o
  18   2   7        193.99        168.83        58.41 o
  19   2   7        100.05        151.02        37.17 o
  20   2   7        233.85        251.11        40.66 o
   1   3   7       3582.10       3623.67       218.07 o
   2   3   7       4408.68       4387.08       141.07 o
   3   3   7       2850.46       3028.13       136.80 o
   4   3   7       1576.82       1448.27        76.55 o
   5   3   7        160.00        182.14        32.96 o
   6   3   7       2169.52       2381.70        91.48 o
   7   3   7       1259.06       1343.02        81.16 o
   8   3   7       6124.24       6147.40       119.62 o
   9   3   7         53.20         51.27        22.52 o
  10   3   7        243.56        267.69        48.63 o
  11   3   7       2405.50       2385.96       103.04 o
  12   3   7       1335.66       1288.95        69.32 o
  13   3   7        966.64       1038.87        59.67 o
  14   3   7        755.21        762.06        50.34 o
  15   3   7         28.12         22.02        43.93 o
  16   3   7         95.39         66.54        36.34 o
  17   3   7        257.87        243.17        56.27 o
  18   3   7       1040.15        988.81        97.57 o
  19   3   7         43.30        127.79        41.82 o
  20   3   7        166.29        255.13        28.88 o
   1   4   7       1568.28       1336.19       178.21 o
   2   4   7       3213.17       3019.00       148.89 o
   3   4   7      10715.29      10351.42       272.38 o
   4   4   7        822.40        894.18        64.57 o
   5   4   7       4415.36       4821.44       142.59 o
   6   4   7       1863.06       2108.43        88.03 o
   7   4   7       5097.82       5266.09       128.73 o
   8   4   7         31.43         38.67        20.62 o
   9   4   7       1834.26       1785.80        95.57 o
  10   4   7          6.95        -13.24        13.24 o
  11   4   7       2756.89       2622.46       101.58 o
  12   4   7        385.61        403.75        42.56 o
  13   4   7        575.98        587.61        50.22 o
  14   4   7        213.89        205.26        49.97 o
  15   4   7         20.16         -2.62        59.25 o
  16   4   7         11.23         24.14        67.38 o
  17   4   7        668.14        749.51        95.06 o
  18   4   7         40.03         21.95        22.65 o
  19   4   7        161.05        133.14        28.46 o
  20   4   7          0.79         43.07        25.56 o
   1   5   7        109.44         95.41        44.63 o
   2   5   7      10020.10       9465.45       196.95 o
   3   5   7        338.53        378.13        36.78 o
   4   5   7       2226.66       2237.93        76.89 o
   5   5   7        125.31        139.99        15.31 o
   6   5   7       1016.39        804.71        53.59 o
   7   5   7         15.93         29.82        11.86 o
   8   5   7       2718.18       2830.09       112.27 o
   9   5   7        326.57        309.55        53.45 o
  10   5   7        400.71        416.81        76.95 o
  11   5   7        357.20        384.09        67.94 o
  12   5   7       1625.61       1610.58       117.03 o
  13   5   7        634.04        551.12        79.17 o
  14   5   7        711.95        614.60       105.43 o
  15   5   7        100.91         88.94        43.42 o
  16   5   7        903.96        916.58       104.52 o
  17   5   7         16.92          4.01        19.75 o
  18   5   7       1123.94       1064.68       130.11 o
  19   5   7         12.06         43.67        26.72 o
   1   6   7       5794.29       5927.09       217.16 o
   2   6   7       2458.90       2242.95        92.55 o
   3   6   7       3462.27       3245.18        99.36 o
   4   6   7        667.10        772.47        50.53 o
   5   6   7        855.04        850.21        45.03 o
   6   6   7       2480.43       2535.89       136.86 o
   7   6   7        198.17        223.26        59.61 o
   8   6   7        868.90        933.95       108.22 o
   9   6   7        863.17        815.76       100.85 o
  10   6   7       1412.20       1341.83       125.16 o
  11   6   7        424.84        391.85        73.65 o
  12   6   7       2451.98       2433.64       139.47 o
  13   6   7        765.15        646.04        88.02 o
  14   6   7       1389.20       1351.00       139.36 o
  15   6   7        116.69        143.75        41.57 o
  16   6   7        112.81        113.46        27.28 o
  17   6   7        679.06        825.98       129.50 o
  18   6   7        323.36        330.47        62.74 o
  19   6   7        260.19        124.30        45.31 o
   1   7   7       1781.50       1773.96        99.02 o
   2   7   7        579.07        591.69        58.75 o
   3   7   7       4034.83       4025.09       117.36 o
   4   7   7        927.36        899.70        55.93 o
   5   7   7         47.23         12.89        27.75 o
   6   7   7       1620.63       1604.97       121.48 o
   7   7   7       1081.14       1234.42       117.13 o
   8   7   7        816.85        948.76       110.35 o
   9   7   7       1749.16       1655.19       130.31 o
  10   7   7          2.25         10.09        23.54 o
  11   7   7       1052.81       1199.44       115.37 o
  12   7   7        449.42        475.37        70.65 o
  13   7   7       1627.42       2047.43       160.25 o
  14   7   7        351.98        348.45        76.38 o
  15   7   7        213.33        229.76        53.18 o
  16   7   7        131.43         79.04        31.87 o
  17   7   7        668.51        626.02        69.90 o
  18   7   7        233.00        310.18        89.45 o
   1   8   7        455.43        515.96        70.02 o
   2   8   7       4170.56       4039.87       126.44 o
   3   8   7        424.45        474.05        52.48 o
   4   8   7       5993.91       5925.27       219.05 o
   5   8   7        400.28        483.32        80.28 o
   6   8   7        972.57       1226.85       116.98 o
   7   8   7        228.35        229.74        61.15 o
   8   8   7        456.76        251.21        63.38 o
   9   8   7        206.77        203.32        48.17 o
  10   8   7        553.71        574.40        86.40 o
  11   8   7         47.31         69.70        25.89 o
  12   8   7       2261.40       2549.51       173.72 o
  13   8   7        177.15        187.74        44.02 o
  14   8   7        159.94        209.71        53.54 o
  15   8   7        127.73        218.50        49.08 o
  16   8   7        788.17        927.03        97.30 o
  17   8   7         40.37        117.72        53.21 o
  18   8   7       1468.58       1602.84       346.77 o
   1   9   7        235.24        148.87        35.38 o
   2   9   7       1693.71       1818.24        97.41 o
   3   9   7       4385.81       4360.30       195.69 o
   4   9   7         24.43         19.46        30.43 o
   5   9   7       1597.10       1691.66       137.55 o
   6   9   7       1716.93       2009.86       145.19 o
   7   9   7       2703.71       2807.54       162.01 o
   8   9   7        389.87        485.20        84.81 o
   9   9   7        596.78        573.26        86.96 o
  10   9   7        561.79        507.84        83.00 o
  11   9   7        684.75        863.18       131.10 o
  12   9   7        186.43        271.45        66.17 o
  13   9   7       2194.90       2413.08       173.14 o
  14   9   7         43.47         32.92        30.33 o
  15   9   7        111.46         72.02        63.53 o
  16   9   7        224.51        289.75        47.02 o
  17   9   7        512.28        301.31        89.45 o
   1  10   7        306.60        275.12        64.51 o
   2  10   7        532.85        483.62        83.69 o
   3  10   7       1315.58       1286.82       109.11 o
   4  10   7       1947.15       2146.25       145.29 o
   5  10   7        840.15        857.98       109.74 o
   6  10   7       1833.61       1670.19       126.58 o
   7  10   7       1458.75       1508.39       127.12 o
   8  10   7        557.73        648.80       117.54 o
   9  10   7        339.46        509.19        80.80 o
  10  10   7         45.31        108.44        24.93 o
  11  10   7        831.78        776.84       122.85 o
  12  10   7        538.27        501.05        92.17 o
  13  10   7        428.12        396.59        71.81 o
  14  10   7         33.43        111.25        29.21 o
  15  10   7        301.59        287.02        76.65 o
  16  10   7        287.90        362.85        63.77 o
   1  11   7        165.45         89.67        46.33 o
   2  11   7       1841.65       2089.59       144.80 o
   3  11   7        476.48        610.13        91.99 o
   4  11   7        653.94        608.04        92.04 o
   5  11   7        511.86        598.09        90.01 o
   6  11   7        575.82        530.60        82.34 o
   7  11   7        266.56        319.76        52.28 o
   8  11   7       1899.44       2078.71       146.61 o
   9  11   7          0.90         57.16        28.81 o
  10  11   7        226.35        268.94        60.10 o
  11  11   7         47.40         71.47        46.95 o
  12  11   7        844.30       1067.27       120.03 o
  13  11   7        355.86        473.37        93.24 o
  14  11   7         17.04         68.24        34.57 o
   1  12   7       1559.36       1451.40       203.82 o
   2  12   7         89.82         26.29        29.75 o
   3  12   7       1272.05       1438.46       144.78 o
   4  12   7        190.80        148.06        74.93 o
   5  12   7        259.97        421.86        55.82 o
   6  12   7        196.66        225.05        52.32 o
   7  12   7        703.25       1029.94       125.70 o
   8  12   7         46.40         56.30        22.83 o
   9  12   7       1272.57       1440.88       125.60 o
  10  12   7        212.46        233.33        63.02 o
  11  12   7        878.70        935.34       192.81 o
  12  12   7          5.64         86.24        33.34 o
  13  12   7        117.80        127.32        49.18 o
   1  13   7        175.15        171.90        69.95 o
   2  13   7       1842.93       1744.63       161.11 o
   3  13   7        400.97        554.49        99.49 o
   4  13   7         75.80         94.47        98.76 o
   5  13   7        154.55        123.03        33.32 o
   6  13   7        917.18        824.47       120.77 o
   7  13   7         45.51         77.29        24.29 o
   8  13   7       1055.73       1333.80       107.49 o
   9  13   7        113.20         70.42        45.70 o
  10  13   7         25.40        149.71        53.70 o
  11  13   7        205.14        121.83        52.77 o
   1  14   7        606.65        802.36       171.31 o
   2  14   7        505.98        618.15       119.71 o
   3  14   7        337.36        243.37        63.51 o
   4  14   7         99.87         64.81        27.87 o
   5  14   7         99.06        148.41        32.04 o
   6  14   7        358.57        348.07        72.33 o
   7  14   7        391.13        297.91        77.81 o
   8  14   7        373.12        397.91        90.15 o
   9  14   7        121.66        189.75        44.73 o
   1  15   7        268.37        276.45        57.50 o
   2  15   7        554.76        326.44        90.61 o
   3  15   7        309.51        614.55       137.08 o
   4  15   7        422.44        458.12       264.87 o
   5  15   7         54.06        175.08        42.42 o
   0   0   8      25179.38      23678.12       738.85 o
   2   0   8        816.61        880.33        73.05 o
   4   0   8      11235.43      10537.25       247.68 o
   6   0   8       8421.74       8146.96       279.39 o
   8   0   8       2711.90       2553.72       119.05 o
  10   0   8      13405.44      13280.84       273.79 o
  12   0   8       1055.11       1026.96       252.09 o
  14   0   8       4104.28       3846.45       419.38 o
  16   0   8        898.81        930.96        68.97 o
  18   0   8        112.75        203.18        71.45 o
  20   0   8        871.91        956.09       126.63 o
   0   1   8       3892.17       3729.16       203.94 o
   1   1   8       4011.96       4046.52       149.76 o
   2   1   8       1158.82       1188.14        59.07 o
   3   1   8       3024.65       3171.92        95.73 o
   4   1   8         95.50        112.27        20.48 o
   5   1   8       5417.74       5294.33       123.00 o
   6   1   8       4904.30       4930.65       118.58 o
   7   1   8        528.36        475.99        46.75 o
   8   1   8         80.45         37.15        21.03 o
   9   1   8       3724.60       3499.24       112.76 o
  10   1   8       1897.59       1806.31        81.88 o
  11   1   8        878.45        787.98        65.15 o
  12   1   8       3165.01       3086.54       116.16 o
  13   1   8         94.92        188.17        34.98 o
  14   1   8       1867.09       1827.86       186.08 o
  15   1   8       2182.36       2057.76       130.42 o
  16   1   8        406.84        397.56        36.05 o
  17   1   8        979.31       1025.50        64.47 o
  18   1   8          1.12        -12.89        17.44 o
  19   1   8        809.67        916.38        63.86 o
  20   1   8         99.19        132.44        39.50 o
   0   2   8       2599.45       2460.79       169.38 o
   1   2   8       6646.22       6580.54       195.31 o
   2   2   8       5731.45       5568.15       148.38 o
   3   2   8       1725.62       1859.24        74.48 o
   4   2   8       2519.91       2350.52       100.79 o
   5   2   8       4532.32       4871.46       145.33 o
   6   2   8        335.63        500.72        49.92 o
   7   2   8       1010.68       1008.89        63.77 o
   8   2   8        466.41        501.47        43.76 o
   9   2   8        654.22        782.52        53.93 o
  10   2   8       1147.83        982.16        90.76 o
  11   2   8       6899.85       6831.65       211.20 o
  12   2   8        638.33        606.17        84.39 o
  13   2   8        875.32        940.06        69.61 o
  14   2   8        660.73        672.80        44.08 o
  15   2   8        700.34        627.63        38.60 o
  16   2   8        155.71        235.74        27.06 o
  17   2   8       1002.65        812.49        82.80 o
  18   2   8         29.50         36.41        14.08 o
  19   2   8        365.28        413.10        40.09 o
  20   2   8         75.93        110.36        42.98 o
   0   3   8       1419.54       1304.61       239.31 o
   1   3   8       2846.35       2554.94       148.16 o
   2   3   8       2235.55       2192.64       104.82 o
   3   3   8       1115.48       1114.84        93.01 o
   4   3   8       1371.74       1423.36        81.81 o
   5   3   8       3816.75       3639.06       127.21 o
   6   3   8       4128.62       3848.34       127.72 o
   7   3   8       1929.89       1828.54        84.39 o
   8   3   8        388.83        457.36        50.64 o
   9   3   8       1504.00       1444.54        97.18 o
  10   3   8       2394.54       1952.83       109.82 o
  11   3   8          2.44          7.85        28.69 o
  12   3   8       1075.20       1064.30        72.80 o
  13   3   8        559.34        500.65        41.31 o
  14   3   8       3838.95       4023.98       120.31 o
  15   3   8        691.98        644.64        71.26 o
  16   3   8        240.93        266.83        65.97 o
  17   3   8         30.45         49.69        22.39 o
  18   3   8        151.27        178.22        35.92 o
  19   3   8         83.48        131.18        37.22 o
  20   3   8        208.08        271.84        36.01 o
   0   4   8       2993.00       2611.54       295.08 o
   1   4   8       5799.36       5074.71       288.98 o
   2   4   8       2199.54       2269.24       203.21 o
   3   4   8       3330.18       2870.99       148.51 o
   4   4   8       2913.78       2950.50       121.30 o
   5   4   8       7786.58       7498.90       191.20 o
   6   4   8        103.18         71.00        16.54 o
   7   4   8         20.97         45.57        10.99 o
   8   4   8       1282.25       1225.09        95.13 o
   9   4   8        710.94        727.76        69.45 o
  10   4   8       1156.93       1099.19        81.44 o
  11   4   8       2499.64       2379.52       115.10 o
  12   4   8        157.04        132.96        40.88 o
  13   4   8        399.49        297.99        65.23 o
  14   4   8        281.37        289.89        52.77 o
  15   4   8       1114.86       1473.65       122.68 o
  16   4   8        368.70        329.47       126.05 o
  17   4   8        423.78        303.63        65.94 o
  18   4   8        133.45        157.99        48.79 o
  19   4   8        403.77        340.80        57.80 o
   0   5   8       1377.26       1430.07       284.62 o
   1   5   8        759.78        642.41       143.13 o
   2   5   8       4132.59       4020.32       275.39 o
   3   5   8        626.40        462.41        48.51 o
   4   5   8       3148.16       3324.48       165.54 o
   5   5   8         18.67          3.99         8.02 o
   6   5   8       1949.11       1694.38        90.48 o
   7   5   8        392.59        346.67        83.42 o
   8   5   8       2150.92       2119.73       160.84 o
   9   5   8       1041.58       1038.61       115.25 o
  10   5   8       5948.49       5645.51       207.58 o
  11   5   8         63.96         23.86        29.51 o
  12   5   8       2603.59       2437.61       138.52 o
  13   5   8        516.36        533.38        75.21 o
  14   5   8       1021.05       1122.66       103.68 o
  15   5   8         60.39         98.04        25.44 o
  16   5   8        643.19        671.15       159.74 o
  17   5   8        398.13        425.48        82.04 o
  18   5   8        662.74        627.67       183.55 o
  19   5   8         93.65        120.50        22.30 o
   0   6   8       8646.27       8042.50       282.89 o
   1   6   8       4645.70       4389.63       192.53 o
   2   6   8       4439.35       4554.35       147.79 o
   3   6   8        189.95        224.30        58.02 o
   4   6   8       1493.86       1354.58        75.89 o
   5   6   8       6494.50       6384.17       150.30 o
   6   6   8       2905.85       2977.52       119.86 o
   7   6   8       2055.97       1955.79       129.51 o
   8   6   8        669.54        576.65        91.40 o
   9   6   8        698.55        672.67        93.94 o
  10   6   8       1363.22       1514.11       120.78 o
  11   6   8       1223.48       1225.51       112.86 o
  12   6   8       1192.17       1206.47       113.31 o
  13   6   8        305.91        334.49        62.78 o
  14   6   8        967.99       1004.78       113.59 o
  15   6   8       1559.20       1757.69       153.36 o
  16   6   8       1184.64       1048.44       176.58 o
  17   6   8          2.52         31.37        37.17 o
  18   6   8         45.15        126.68        65.06 o
  19   6   8        110.82        110.83        31.37 o
   0   7   8       1085.36        897.47        93.97 o
   1   7   8       8748.97       8275.19       211.47 o
   2   7   8         16.27         -3.47        13.32 o
   3   7   8       2344.07       2463.15        94.05 o
   4   7   8        188.52        154.99        23.82 o
   5   7   8       3050.88       2686.79       147.98 o
   6   7   8        828.48        887.49       109.37 o
   7   7   8       1190.54       1225.76       128.91 o
   8   7   8        214.68        115.49        41.67 o
   9   7   8       4504.43       4956.01       206.98 o
  10   7   8        770.78        925.17       112.74 o
  11   7   8        318.07        430.55        75.87 o
  12   7   8         30.06         10.02        22.13 o
  13   7   8        123.59        152.67        80.94 o
  14   7   8        353.73        268.08        63.94 o
  15   7   8       2247.51       2130.53       150.60 o
  16   7   8         40.36         68.78        24.01 o
  17   7   8         42.36        108.18        30.30 o
  18   7   8         12.85         49.86        38.34 o
   0   8   8       3866.85       4429.03       328.77 o
   1   8   8        514.08        502.50        70.09 o
   2   8   8       1789.67       1738.43        85.74 o
   3   8   8       2846.47       2595.21       100.37 o
   4   8   8       2944.03       3328.00       166.93 o
   5   8   8         33.22         23.63        27.22 o
   6   8   8       2298.99       2671.57       159.83 o
   7   8   8        337.97        290.14        62.85 o
   8   8   8       1210.29       1066.79       123.12 o
   9   8   8        715.69        698.28        96.49 o
  10   8   8       2843.33       2797.10       159.04 o
  11   8   8          6.84         44.27        21.95 o
  12   8   8       1008.68       1000.40       120.91 o
  13   8   8        172.75        111.40        38.31 o
  14   8   8        397.74        511.51        94.11 o
  15   8   8        140.27        223.49        52.76 o
  16   8   8        543.92        725.61        84.27 o
  17   8   8        204.36        236.79        45.91 o
   0   9   8       1885.78       2128.59       170.98 o
   1   9   8        598.13        822.03        91.68 o
   2   9   8       1167.80       1247.93        81.91 o
   3   9   8        202.98        227.66        57.40 o
   4   9   8        436.36        433.73        77.27 o
   5   9   8        319.20        379.36        71.62 o
   6   9   8        739.47        861.45       113.92 o
   7   9   8        369.27        471.79        79.62 o
   8   9   8        129.74        191.86        43.82 o
   9   9   8       3044.31       3014.15       168.20 o
  10   9   8        311.50        401.77        71.14 o
  11   9   8        703.60        741.15        97.05 o
  12   9   8        584.13        830.27       104.25 o
  13   9   8        151.93        199.28        61.19 o
  14   9   8        311.30        500.74        84.08 o
  15   9   8        247.21        160.45        34.80 o
  16   9   8         19.95         18.12        94.10 o
   0  10   8       5665.13       5384.60       361.73 o
   1  10   8        578.79        547.34        80.41 o
   2  10   8        461.45        461.05        78.72 o
   3  10   8        126.67        217.21        49.19 o
   4  10   8        545.90        655.50       100.15 o
   5  10   8       2345.12       2717.88       159.29 o
   6  10   8        544.56        562.37        89.50 o
   7  10   8        390.74        620.97        90.00 o
   8  10   8        473.33        548.39        83.17 o
   9  10   8        523.48        562.46        66.06 o
  10  10   8       1994.68       2323.26       151.64 o
  11  10   8        250.07        212.70        51.45 o
  12  10   8         12.26         67.60        55.76 o
  13  10   8        160.95        167.93        54.37 o
  14  10   8        168.60        114.90        60.49 o
  15  10   8         41.55        134.80        45.38 o
   0  11   8       1769.94       1610.93       158.49 o
   1  11   8       1203.90       1237.59       130.17 o
   2  11   8        291.50        218.38        58.48 o
   3  11   8       1794.06       2205.51       153.56 o
   4  11   8       1339.80       1699.08       132.16 o
   5  11   8        514.21        658.43        95.13 o
   6  11   8       2461.36       2372.55       150.83 o
   7  11   8        441.62        485.71        94.57 o
   8  11   8        193.92        209.24        40.54 o
   9  11   8         44.24        115.00        28.14 o
  10  11   8        831.96        785.40       120.61 o
  11  11   8        144.60         38.79        80.94 o
  12  11   8         85.37         69.31        47.46 o
  13  11   8        343.75        392.63        76.13 o
  14  11   8        253.91        420.99        84.72 o
   0  12   8        221.20        189.36       117.33 o
   1  12   8       2293.99       2113.96       186.52 o
   2  12   8         13.09          0.39        37.61 o
   3  12   8        271.35        163.61       102.09 o
   4  12   8        212.12        245.37        38.45 o
   5  12   8       1561.04       1794.55       139.16 o
   6  12   8        193.12        157.29        79.14 o
   7  12   8         94.47         97.57        26.16 o
   8  12   8          5.08         36.52        25.75 o
   9  12   8        299.57        286.51        61.57 o
  10  12   8        132.40        115.90        71.95 o
  11  12   8        955.41        991.99       119.08 o
  12  12   8         83.70        141.13        69.68 o
   0  13   8        900.25        922.40       296.24 o
   1  13   8        305.72        278.80       152.18 o
   2  13   8        182.18        129.22        57.67 o
   3  13   8          4.99        -22.78        22.78 o
   4  13   8        674.23        977.84       138.73 o
   5  13   8        186.72          3.61        28.01 o
   6  13   8        549.55        522.92        88.68 o
   7  13   8         49.62        125.46        27.00 o
   8  13   8        174.83        280.55        79.00 o
   9  13   8         61.40        -10.51        82.95 o
  10  13   8        701.55        493.27       113.66 o
  11  13   8        124.13         23.23        49.95 o
   0  14   8        944.25       1097.82       303.21 o
   1  14   8        385.20        467.50        89.10 o
   2  14   8         23.21        164.92        44.98 o
   3  14   8         26.28         27.48        45.31 o
   4  14   8        214.14          0.38        39.61 o
   5  14   8        258.64        221.82        70.86 o
   6  14   8        200.83        192.30        51.58 o
   7  14   8         97.06         55.07       178.90 o
   8  14   8          5.72         75.88       113.27 o
   0  15   8        202.76        332.25        69.70 o
   1  15   8        512.91        540.44       297.98 o
   2  15   8        200.25        243.58       139.99 o
   3  15   8        285.90        436.81        83.64 o
   4  15   8         45.16        115.20        60.99 o
   2   0   9      21127.69      21184.40       390.88 o
   4   0   9       3727.53       3618.19       152.28 o
   6   0   9       8132.70       8122.89       271.25 o
   8   0   9       1156.08       1035.02        85.95 o
  10   0   9       2543.54       2482.35       122.17 o
  12   0   9        900.24       1028.51        87.78 o
  14   0   9       2142.15       2073.67       299.72 o
  16   0   9       1123.12       1141.97       296.24 o
  18   0   9        457.90        461.51        44.01 o
  20   0   9          7.14         -6.97        25.56 o
   1   1   9       3794.25       3507.68       148.32 o
   2   1   9        847.61        784.62        63.06 o
   3   1   9       5039.33       4912.91       126.71 o
   4   1   9       2162.80       2265.57        85.63 o
   5   1   9       2729.58       2750.84       102.82 o
   6   1   9        331.22        351.88        41.95 o
   7   1   9       1703.94       1701.64        72.83 o
   8   1   9        465.96        473.93        42.25 o
   9   1   9       1555.37       1351.82        76.43 o
  10   1   9       1135.45       1058.53        80.67 o
  11   1   9       2376.33       2193.59       118.72 o
  12   1   9        557.81        551.46        59.30 o
  13   1   9       1361.93       1579.76        96.62 o
  14   1   9       1196.30       1068.73        78.48 o
  15   1   9         79.36         84.29        33.94 o
  16   1   9        673.50        633.30        53.14 o
  17   1   9        384.56        348.05        45.94 o
  18   1   9        195.80        203.95        25.90 o
  19   1   9        372.90        390.19        40.56 o
  20   1   9         24.74        155.13        17.86 o
   1   2   9       1908.51       1841.78       109.69 o
   2   2   9        820.06        655.95        56.13 o
   3   2   9      11192.18      11129.10       197.06 o
   4   2   9        132.17        154.07        31.33 o
   5   2   9       1676.48       1528.51        72.00 o
   6   2   9       1995.52       2141.13        94.12 o
   7   2   9       2365.64       2487.67       107.18 o
   8   2   9        716.70        638.55        57.35 o
   9   2   9         83.71         89.37        34.21 o
  10   2   9        318.11        352.42        46.04 o
  11   2   9         27.35         17.04        12.91 o
  12   2   9       1001.14       1032.96        74.54 o
  13   2   9       2054.27       1960.02       106.44 o
  14   2   9        508.67        444.69       106.78 o
  15   2   9        104.06         95.57        28.17 o
  16   2   9        174.65        156.49        30.89 o
  17   2   9        486.54        501.06        54.98 o
  18   2   9        246.33        243.75        39.48 o
  19   2   9        270.94        356.04        43.67 o
  20   2   9         14.41         46.54        45.31 o
   1   3   9       1220.34       1243.95        99.60 o
   2   3   9       1018.04        897.12        99.61 o
   3   3   9       3680.22       3816.87       142.39 o
   4   3   9        162.41        159.71        27.54 o
   5   3   9        640.16        671.14        62.58 o
   6   3   9       8708.06       8615.41       208.07 o
   7   3   9       3181.78       3085.07       118.50 o
   8   3   9       8523.49       8565.66       218.66 o
   9   3   9         85.74         80.29        29.67 o
  10   3   9        178.80        189.31        47.66 o
  11   3   9         19.55         33.62        12.70 o
  12   3   9       1157.89       1121.09       177.61 o
  13   3   9        435.96        450.08        78.53 o
  14   3   9        387.54        307.44        72.39 o
  15   3   9          2.13         44.87        20.13 o
  16   3   9        457.07        324.61        45.51 o
  17   3   9         73.34        156.49        43.84 o
  18   3   9        572.90        442.28        49.94 o
  19   3   9        167.56        163.93        24.88 o
   1   4   9       1516.36       2048.21       269.52 o
   2   4   9        111.17         86.73        40.30 o
   3   4   9       3919.08       3662.49       173.00 o
   4   4   9        453.20        474.66        52.67 o
   5   4   9        696.12        697.50        59.62 o
   6   4   9        590.31        485.15        46.61 o
   7   4   9       4045.35       4088.19       148.26 o
   8   4   9        220.97        148.24        73.34 o
   9   4   9       2961.72       3028.02       244.76 o
  10   4   9        473.07        459.14       116.12 o
  11   4   9       1989.50       2023.81       166.70 o
  12   4   9        487.04        389.72        65.49 o
  13   4   9       1836.49       1822.60       121.66 o
  14   4   9         33.71         81.95        40.08 o
  15   4   9        266.95        171.66        49.08 o
  16   4   9        140.21        147.54        40.20 o
  17   4   9       1373.55       1346.93       129.48 o
  18   4   9        131.56         59.21        22.99 o
  19   4   9         57.54        155.67        30.20 o
   1   5   9       1375.79       1455.95       212.30 o
   2   5   9       1963.78       1940.82       223.29 o
   3   5   9        362.54        392.46       117.93 o
   4   5   9       1410.95       1372.48       125.04 o
   5   5   9        385.13        401.06        77.83 o
   6   5   9        559.44        593.59        69.22 o
   7   5   9        353.33        315.88        80.13 o
   8   5   9       4743.97       4760.71       237.61 o
   9   5   9       1984.92       2000.78       156.63 o
  10   5   9        627.93        767.94        96.97 o
  11   5   9       2121.37       1987.87       125.66 o
  12   5   9       2599.50       2751.61       149.92 o
  13   5   9         18.84          4.31        24.15 o
  14   5   9        246.41        170.24        30.07 o
  15   5   9         43.61        120.32        37.66 o
  16   5   9        165.48         77.84        42.98 o
  17   5   9        220.74        250.46        53.30 o
  18   5   9        556.73        569.52        70.83 o
  19   5   9         57.81         61.48        24.98 o
   1   6   9       1361.36       1361.16       127.78 o
   2   6   9       4508.10       4473.39       151.58 o
   3   6   9       2560.01       2388.70       111.25 o
   4   6   9       1141.45       1360.89        82.08 o
   5   6   9        988.86        951.22        88.96 o
   6   6   9        987.82        882.06       103.10 o
   7   6   9       2490.27       2599.52       147.63 o
   8   6   9       2242.95       1958.06       134.23 o
   9   6   9       2372.03       2272.19       138.47 o
  10   6   9        191.46        203.36        51.76 o
  11   6   9        624.76        565.61        85.06 o
  12   6   9        499.34        510.39        70.94 o
  13   6   9       1271.82       1356.68       119.27 o
  14   6   9        104.22         63.22        49.45 o
  15   6   9         36.38         64.90        24.53 o
  16   6   9        765.91        909.02       114.52 o
  17   6   9        140.26        102.07        25.32 o
  18   6   9         51.55         75.75        22.89 o
   1   7   9       2350.13       2042.72       156.01 o
   2   7   9       1840.61       1990.04        99.34 o
   3   7   9       5603.38       5749.69       147.74 o
   4   7   9        762.24        839.58       104.36 o
   5   7   9         76.65         94.31        39.34 o
   6   7   9        183.32        211.35        56.13 o
   7   7   9       3707.31       3841.91       182.25 o
   8   7   9        180.17        141.74        52.99 o
   9   7   9        795.32        772.93        99.54 o
  10   7   9         88.64        137.03        36.23 o
  11   7   9        477.82        415.61        70.14 o
  12   7   9        381.39        378.01        62.34 o
  13   7   9       2098.22       2300.16       144.85 o
  14   7   9          7.73         15.64        23.15 o
  15   7   9        104.28        205.67        43.48 o
  16   7   9        333.40        242.57        56.31 o
  17   7   9        339.83        326.21        58.23 o
  18   7   9        318.64        206.79        91.78 o
   1   8   9         77.22         71.61        29.68 o
   2   8   9       3067.83       3151.69       115.77 o
   3   8   9        279.35        343.14        80.16 o
   4   8   9       1621.89       1703.84       132.76 o
   5   8   9        474.89        494.33        86.02 o
   6   8   9       3796.30       3951.48       188.64 o
   7   8   9         54.54         34.83        26.57 o
   8   8   9       1097.64       1332.29       140.07 o
   9   8   9         52.67         50.54        30.70 o
  10   8   9        218.03        231.76        48.55 o
  11   8   9         92.07         93.99        36.35 o
  12   8   9        555.93        763.68        99.29 o
  13   8   9        131.30         82.18        35.10 o
  14   8   9       1111.19       1198.36       128.08 o
  15   8   9         91.13        141.52        34.06 o
  16   8   9        880.03        816.11       113.47 o
  17   8   9         33.22         11.42       100.49 o
   1   9   9       1905.85       1540.94       100.46 o
   2   9   9        569.32        600.05        90.60 o
   3   9   9       1528.03       1825.76       132.91 o
   4   9   9        232.94        151.75        50.81 o
   5   9   9        373.84        354.34        69.54 o
   6   9   9        169.37        186.34        48.30 o
   7   9   9       2752.41       2787.39       163.67 o
   8   9   9        357.00        266.07        58.19 o
   9   9   9         41.29         78.50        27.78 o
  10   9   9        235.03        132.04        33.03 o
  11   9   9        744.88        783.04       103.40 o
  12   9   9         94.28        147.46        44.13 o
  13   9   9        698.73        842.70       130.41 o
  14   9   9         66.68        159.40        34.39 o
  15   9   9        383.83        292.69        54.86 o
  16   9   9         64.62        199.11        42.07 o
   1  10   9        632.20        634.45        93.64 o
   2  10   9       2779.67       2873.33       165.50 o
   3  10   9        441.32        491.54        78.15 o
   4  10   9        776.61        941.39       116.76 o
   5  10   9        114.18        103.34        42.93 o
   6  10   9       1567.81       2107.45       152.47 o
   7  10   9        171.18        290.62        72.34 o
   8  10   9        320.05        435.55        88.89 o
   9  10   9        505.19        544.06        81.91 o
  10  10   9        150.64        177.22        38.05 o
  11  10   9        504.52        725.20       121.19 o
  12  10   9        807.66       1044.41       142.11 o
  13  10   9        121.61         73.10        28.60 o
  14  10   9         10.29         25.25        32.51 o
  15  10   9         28.59        159.64        33.72 o
   1  11   9         69.06         73.85        43.38 o
   2  11   9       2521.88       2673.59       185.60 o
   3  11   9       1386.93       1546.38       123.62 o
   4  11   9        358.02        244.01        58.69 o
   5  11   9        186.89        169.06        69.08 o
   6  11   9          5.42         30.91        17.00 o
   7  11   9        748.67        957.19       120.02 o
   8  11   9        766.92       1054.66       109.06 o
   9  11   9        163.77        223.35        73.11 o
  10  11   9         48.26        144.56        37.44 o
  11  11   9        215.31        122.86        28.00 o
  12  11   9        310.39        378.35        69.47 o
  13  11   9        206.95        258.79        64.41 o
   1  12   9       1402.47       1468.54       271.92 o
   2  12   9          0.49         -4.72        32.00 o
   3  12   9        786.58        740.23       124.58 o
   4  12   9          0.32         42.51        44.25 o
   5  12   9        296.15        287.96        46.82 o
   6  12   9         20.97         57.46        43.95 o
   7  12   9        897.70       1138.81       110.74 o
   8  12   9         82.70         81.46        25.64 o
   9  12   9        762.82        647.92        94.79 o
  10  12   9         75.63         64.78        57.02 o
  11  12   9        198.86        170.64        49.44 o
  12  12   9        196.69        222.93        46.88 o
   1  13   9        125.77         18.99        66.80 o
   2  13   9        790.52        666.46       131.72 o
   3  13   9        231.59        204.59       165.69 o
   4  13   9        305.93        142.98        50.91 o
   5  13   9        189.37        153.14        55.26 o
   6  13   9         23.50        -24.34        72.03 o
   7  13   9         67.17        177.15        35.21 o
   8  13   9        438.46        579.59        49.92 o
   9  13   9         19.41         82.09        43.45 o
  10  13   9         30.96         44.94        28.07 o
   1  14   9        226.46        315.99        87.13 o
   2  14   9        267.30        141.51        51.08 o
   3  14   9         81.13         43.94        34.47 o
   4  14   9        160.37        176.15        48.13 o
   5  14   9         16.49         88.77        79.57 o
   6  14   9         21.52         98.72        29.06 o
   7  14   9        403.12        380.33        83.64 o
   1  15   9        218.67        259.06        70.86 o
   0   0  10      18632.29      18079.80       715.62 o
   2   0  10       6075.36       5765.58       285.28 o
   4   0  10       1980.82       1770.20       109.26 o
   6   0  10        650.14        719.99        75.61 o
   8   0  10        870.84        728.16        73.51 o
  10   0  10        607.29        508.35       101.76 o
  12   0  10       2066.21       1660.09       354.32 o
  14   0  10        682.50        802.75       243.96 o
  16   0  10       1580.89       1748.38       254.42 o
  18   0  10        573.60        491.87        45.35 o
   0   1  10       1654.18       1356.56       140.88 o
   1   1  10       5665.52       5780.58       201.03 o
   2   1  10        951.82        982.35        94.88 o
   3   1  10        595.77        517.67        43.82 o
   4   1  10        778.47        702.24        53.18 o
   5   1  10       1834.05       1678.90        77.21 o
   6   1  10       1307.68       1223.68        65.27 o
   7   1  10        982.90        952.14        58.78 o
   8   1  10       1126.72       1090.79        62.66 o
   9   1  10       2375.04       2379.42       123.75 o
  10   1  10        170.38         92.41        31.57 o
  11   1  10        611.59        537.46        91.73 o
  12   1  10        513.14        395.56       109.79 o
  13   1  10         32.79         10.25        44.73 o
  14   1  10       1094.65        994.43       261.39 o
  15   1  10       2141.96       1795.27       267.74 o
  16   1  10        178.15        177.39        82.48 o
  17   1  10        189.42        233.47        38.10 o
  18   1  10        146.05        157.11        30.14 o
  19   1  10       1146.68       1273.50        69.39 o
   0   2  10       9866.97      10008.44       382.58 o
   1   2  10       1506.44       1644.34       110.15 o
   2   2  10         85.17         29.13        28.67 o
   3   2  10       2205.26       2251.49       104.31 o
   4   2  10       4351.45       4139.61       123.79 o
   5   2  10       3349.72       3211.28       108.06 o
   6   2  10       1449.01       1483.98        74.79 o
   7   2  10        394.93        421.45        45.20 o
   8   2  10       1356.61       1243.14        75.18 o
   9   2  10       4479.55       4060.93       181.79 o
  10   2  10       2804.78       3095.04       208.64 o
  11   2  10        763.82        714.81       165.54 o
  12   2  10          7.68         29.48        37.14 o
  13   2  10       1438.06       1497.89       232.04 o
  14   2  10        154.05         50.88        45.31 o
  15   2  10       1751.49       2045.05       210.78 o
  16   2  10        967.30        873.58       103.46 o
  17   2  10        122.08        151.17        34.41 o
  18   2  10          8.17         12.70        31.23 o
  19   2  10         39.04         76.63        27.10 o
   0   3  10       1212.55       1408.70       159.91 o
   1   3  10       2291.27       2228.46       132.18 o
   2   3  10       5615.70       5637.50       207.31 o
   3   3  10       2783.49       2634.34       114.63 o
   4   3  10       5970.51       5754.69       214.94 o
   5   3  10       3438.33       3495.48       140.55 o
   6   3  10       2106.40       2062.78       117.85 o
   7   3  10        657.63        691.03        81.20 o
   8   3  10       1017.22       1132.14       187.22 o
   9   3  10          8.66         37.90        34.63 o
  10   3  10       3161.02       3162.91       253.64 o
  11   3  10        691.83        667.51       142.89 o
  12   3  10        320.12         96.42        70.86 o
  13   3  10        386.66        404.28       155.67 o
  14   3  10       2923.70       3096.07       247.73 o
  15   3  10         43.45        108.80        20.96 o
  16   3  10         47.41         34.43        19.66 o
  17   3  10        131.22        199.25        33.73 o
  18   3  10         13.12          6.58        45.64 o
  19   3  10        165.38        160.51        39.93 o
   0   4  10        118.74         62.04        39.62 o
   1   4  10       2106.45       2120.92       155.41 o
   2   4  10       2946.61       2840.42       177.08 o
   3   4  10        408.10        370.41        72.09 o
   4   4  10        286.46        205.91        50.26 o
   5   4  10       6321.85       6506.24       252.11 o
   6   4  10        693.96        638.17        80.40 o
   7   4  10        434.95        354.60        73.42 o
   8   4  10         95.45        -13.94        68.54 o
   9   4  10       1571.62       1711.61       245.94 o
  10   4  10        371.47        378.04       103.80 o
  11   4  10       3835.09       3921.41       285.96 o
  12   4  10        760.95        654.92       107.17 o
  13   4  10        189.24        136.57        32.21 o
  14   4  10        227.87        233.88        57.18 o
  15   4  10        368.99        472.44        68.32 o
  16   4  10        421.60        603.13       106.93 o
  17   4  10        393.66        277.50        62.73 o
  18   4  10        129.92         73.80        50.24 o
  19   4  10        624.11        803.88       110.94 o
   0   5  10       7790.80       6807.66       539.04 o
   1   5  10        284.30        224.58       102.44 o
   2   5  10       1531.61       1426.74       140.35 o
   3   5  10        707.21        599.94       105.30 o
   4   5  10       4798.22       4671.24       222.48 o
   5   5  10       1399.09       1265.23       124.29 o
   6   5  10       4525.94       4743.42       209.59 o
   7   5  10       1114.29       1046.11       187.39 o
   8   5  10         51.34         -1.64        44.70 o
   9   5  10       1548.82       1764.72       171.72 o
  10   5  10       4248.21       3661.83       215.72 o
  11   5  10         68.76        115.04        36.92 o
  12   5  10       1335.46       1074.40       107.27 o
  13   5  10         75.59         67.33        24.50 o
  14   5  10        820.15       1029.10        99.71 o
  15   5  10        302.64        304.77        43.54 o
  16   5  10        225.27        177.04        59.25 o
  17   5  10         63.34        147.54        53.44 o
  18   5  10        401.32        297.11        56.01 o
   0   6  10       6525.19       6617.14       562.27 o
   1   6  10       2342.05       2528.89       245.28 o
   2   6  10         83.47         62.18        92.94 o
   3   6  10       2623.40       2542.46       142.15 o
   4   6  10       2071.39       2028.57        92.92 o
   5   6  10       3836.25       3597.02       164.43 o
   6   6  10       1736.54       1765.62       164.44 o
   7   6  10       2306.16       2453.29       180.53 o
   8   6  10        456.35        394.45        91.60 o
   9   6  10        474.99        576.95        91.14 o
  10   6  10       3112.75       3247.80       170.03 o
  11   6  10        350.57        373.13        68.55 o
  12   6  10        452.78        345.99        61.41 o
  13   6  10        402.56        342.10        57.03 o
  14   6  10        392.02        307.50        78.41 o
  15   6  10        189.67        207.73        51.62 o
  16   6  10       1167.87       1139.03       131.11 o
  17   6  10        630.24        633.29       155.09 o
  18   6  10        114.88        314.35        38.23 o
   0   7  10       3952.49       3732.97       214.43 o
   1   7  10       1417.11       1275.82       129.06 o
   2   7  10        815.45        972.61        85.73 o
   3   7  10       5119.06       4973.20       167.83 o
   4   7  10       1076.05       1181.40       150.89 o
   5   7  10       1667.56       1613.95       137.45 o
   6   7  10        770.36        652.95        94.68 o
   7   7  10       1219.38       1490.93       162.82 o
   8   7  10        489.03        376.10        77.13 o
   9   7  10       3610.50       3443.03       176.93 o
  10   7  10       1523.12       1664.46       141.74 o
  11   7  10       1725.27       1592.51       139.93 o
  12   7  10        239.83        281.26        45.84 o
  13   7  10        357.26        547.55        70.52 o
  14   7  10        746.67        849.02       121.89 o
  15   7  10        161.97        185.41        41.85 o
  16   7  10         61.06        -36.01        36.01 o
  17   7  10        299.24        131.27        59.25 o
   0   8  10       3921.23       3969.13       190.69 o
   1   8  10        309.84        245.82        45.68 o
   2   8  10        192.56        165.28        30.10 o
   3   8  10        265.60        335.11        70.90 o
   4   8  10        968.81        994.02       120.00 o
   5   8  10        832.12        847.78       111.94 o
   6   8  10       3731.48       3856.10       188.40 o
   7   8  10        516.10        372.09        68.41 o
   8   8  10        585.00        485.97        87.67 o
   9   8  10         45.08         35.50        30.47 o
  10   8  10       4218.65       4455.73       208.09 o
  11   8  10        154.62        196.86        38.68 o
  12   8  10        128.13        189.11        37.39 o
  13   8  10        129.86        164.78        38.74 o
  14   8  10        716.79        815.25       117.62 o
  15   8  10        267.47        152.18        37.80 o
  16   8  10        111.75        251.14        88.87 o
   0   9  10        290.31        279.97        54.33 o
   1   9  10       2580.85       2506.61       116.90 o
   2   9  10        547.38        537.33        82.77 o
   3   9  10        979.42       1175.07       117.05 o
   4   9  10       1422.87       1782.68       136.38 o
   5   9  10       1659.84       1642.10       133.17 o
   6   9  10        254.44        343.73        67.06 o
   7   9  10        977.37       1215.59       137.42 o
   8   9  10        112.55        106.83        32.93 o
   9   9  10       2283.44       2645.10       166.16 o
  10   9  10        498.57        424.45       133.85 o
  11   9  10        645.57        673.55        91.56 o
  12   9  10        169.89        206.11        42.76 o
  13   9  10        195.84        313.58        63.92 o
  14   9  10        104.47        116.21        56.40 o
  15   9  10        558.40        466.93       177.45 o
   0  10  10       2201.65       2303.53       174.97 o
   1  10  10        147.01        145.77        50.81 o
   2  10  10        472.70        613.60        94.68 o
   3  10  10        268.80        357.27        69.58 o
   4  10  10       1044.64       1022.17       109.29 o
   5  10  10       1124.24       1261.59       123.64 o
   6  10  10        718.40       1076.23       111.41 o
   7  10  10         69.80        109.35        50.47 o
   8  10  10        107.33         88.59        50.97 o
   9  10  10        536.63        664.45        89.25 o
  10  10  10       1015.91       1060.10       112.68 o
  11  10  10        706.33        813.74       142.53 o
  12  10  10        153.18        185.87        52.57 o
  13  10  10         39.86         69.12        87.76 o
  14  10  10        186.09        198.95        86.73 o
   0  11  10         29.33         62.73        87.13 o
   1  11  10        251.22        183.74        41.24 o
   2  11  10        135.37         89.99        31.27 o
   3  11  10         57.53         88.10        31.80 o
   4  11  10       2044.43       2195.99       152.30 o
   5  11  10       1357.45       1340.14       115.27 o
   6  11  10        840.72       1056.71       189.18 o
   7  11  10         21.94         67.83        38.73 o
   8  11  10        176.19        335.91        74.79 o
   9  11  10         36.95        155.48        31.55 o
  10  11  10        820.79        854.55        81.29 o
[truncated: 91,890 more chars]
